# Supplementary material for: Patterned progression of gut microbiota associated with necrotizing enterocolitis and late onset sepsis in preterm infants: a prospective study in a Chinese neonatal intensive care unit
Source: PeerJ. 2019 Jul 22;7:e7310. doi: 10.7717/peerj.7310 (PMC6657676; doi:10.7717/peerj.7310)
Supplement: Dataset S1 — Differences in the sobs and shannon indices over time were analyzed by a two-way repeated measures ANOVA, with time interval (EPP, EPO, LPO, ED, MD, LD, PD) as a within-subject factor and group (NEC, LOS, control) as a between-subject factor. [file peerj-07-7310-s005.xlsx]

## Sheet: matrix1_alpha
	time	sobs	shannon	simpson	ace	chao
1	control1-early disease	33	0.365138	0.813101	100.765	48.1111
2	control1-early post partum	195	3.17429	0.079098	219.093	217.944
3	control1-early pre-onset	120.5	1.65809	0.527655	142.262	141.917
4	control1-late pre-onset	23.5	0.551528	0.706269	65.1547	36
5	control10-early disease	49	1.86998	0.194491	93.0326	64
6	control10-early post partum	163	1.91323	0.363379	211.551	197.44
7	control10-early pre-onset	72	0.868205	0.577947	145.443	101.077
8	control10-late pre-onset	54	1.63322	0.256391	140.325	77.75
9	control11-early disease	30	1.07262	0.417021	44.5524	34.6667
10	control11-early post partum	187	2.77828	0.138793	211.774	211
11	control11-early pre-onset	45	0.515752	0.770726	68.9821	69.4286
12	control11-late pre-onset	26	0.463656	0.782223	36.7546	48.5
13	control12-early disease	70	1.69088	0.303009	86.2445	83.9091
14	control12-early post partum	209	2.99913	0.135726	235.057	225.5
15	control12-early pre-onset	109	1.34008	0.547566	158.44	143.946
16	control12-late pre-onset	54	1.40567	0.430502	60.3004	59.1429
17	control13-early disease	58	1.72332	0.262617	97.8968	77.4286
18	control13-early post partum	111.5	1.45093	0.402046	144.616	151.401
19	control13-early pre-onset	103	1.28238	0.504713	161.652	137.338
20	control13-late pre-onset	57	1.3527	0.447406	123.678	81.4286
21	control14-early disease	49	1.0561	0.547478	89.9748	87.25
22	control14-early post partum	181	3.04951	0.113745	199.168	199.9
23	control14-early pre-onset	57	0.347442	0.879867	159.311	100.875
24	control14-late pre-onset	36	1.03913	0.43066	252.834	106
25	control15-early disease	25.6667	0.571535	0.689175	44.4098	38.4167
26	control15-early post partum	183	3.02391	0.136196	198.809	199.667
27	control15-early pre-onset	168	1.99539	0.296823	208.34	201.913
28	control15-late pre-onset	18	0.318218	0.850385	28.9712	23.6
29	control16-early disease	40	1.06844	0.561572	43.9743	42.25
30	control16-early post partum	200.5	3.21961	0.080564	223.928	226.946
31	control16-early pre-onset	133.5	2.04665	0.247197	181.694	182.333
32	control16-late pre-onset	44.5	1.21934	0.452237	78.1618	61.2976
33	control17-early disease	43	1.59641	0.288924	72.8762	58.6
34	control17-early post partum	184	2.86014	0.162134	201.532	207.625
35	control17-early pre-onset	65	0.923024	0.596149	130.622	101.111
36	control17-late pre-onset	46	1.60678	0.265893	127.077	73.1429
37	control2-early disease	81	0.507628	0.80467	111.854	108.083
38	control2-early post partum	184	2.88035	0.157367	197.991	201.25
39	control2-early pre-onset	188	2.822	0.136171	203.896	205.182
40	control2-late pre-onset	185	2.79893	0.137434	205.603	204.375
41	control3-early disease	31	0.812926	0.524743	56.5203	47.5
42	control3-early post partum	208.5	3.15529	0.103875	229.375	226.229
43	control3-early pre-onset	194.5	3.24957	0.073524	216.708	219.25
44	control3-late pre-onset	56	0.41701	0.846052	70.5174	69.9091
45	control4-early disease	52.5	1.08621	0.51989	79.8408	71.6667
46	control4-early post partum	209	3.16316	0.110339	226.596	228.895
47	control4-early pre-onset	91	0.766875	0.715024	134.942	139.343
48	control4-late pre-onset	29	0.802747	0.629916	56.073	47.3333
49	control5-early disease	57	1.00776	0.481984	162.172	158.5
50	control5-early post partum	205	3.19516	0.083954	223.582	229.8
51	control5-early pre-onset	152	2.6341	0.128201	178.733	173.378
52	control5-late pre-onset	80	1.30962	0.377408	147.737	115.429
53	control6-early disease	48	1.30443	0.380881	207.721	106.875
54	control6-early post partum	201	3.02129	0.131568	226.606	224.05
55	control6-early pre-onset	215.5	3.07852	0.119476	244.889	249.188
56	control6-late pre-onset	52.5	1.03929	0.431464	73.853	75.0556
57	control7-early disease	43.5	0.615417	0.737513	63.3463	61.9375
58	control7-early post partum	199.5	2.92779	0.147178	221.607	217.1
59	control7-early pre-onset	134.5	1.92397	0.305188	188.421	182.106
60	control7-late pre-onset	68	1.00092	0.500147	151.506	130.806
61	control8-early disease	30	1.04574	0.477315	91.963	43
62	control8-early post partum	196	3.09894	0.120599	205.325	204.261
63	control8-early pre-onset	188	3.03926	0.129717	205.765	209.938
64	control8-late pre-onset	18	0.738993	0.646023	25.92	21.75
65	control9-early disease	35	0.469488	0.807087	46.7627	44.1667
66	control9-early post partum	124	0.807178	0.751341	156.896	151.789
67	control9-early pre-onset	94	0.621595	0.759542	126.356	115.75
68	control9-late pre-onset	190	2.87642	0.136247	205.614	204.286
69	LOS1-early disease	37	0.343211	0.845465	77.9583	53.9444
70	LOS1-early post partum	183.5	3.12835	0.0840915	202.709	200.238
71	LOS1-early pre-onset	185	3.06518	0.092087	208.517	204.84
72	LOS1-late pre-onset	73.5	0.822196	0.652367	92.0211	82.7333
73	LOS2-early disease	56	0.539878	0.76979	103.672	75.4588
74	LOS2-early post partum	177	3.17108	0.078088	196.397	194.182
75	LOS2-early pre-onset	203	3.1477	0.090713	232.301	233.273
76	LOS2-late pre-onset	15	0.36779	0.813688	41.0936	43
77	LOS3-early disease	35	0.557306	0.712707	102.189	57.8333
78	LOS3-early post partum	127	1.89104	0.396379	170.436	160.194
79	LOS3-early pre-onset	106	1.84001	0.306717	147.468	129.517
80	LOS3-late pre-onset	42.5	0.649409	0.740633	61.4177	58.4545
81	NEC1-early disease	58.6667	0.566656	0.725933	103.949	88.2798
82	NEC1-early post partum	191	3.15172	0.108972	206.371	204.636
83	NEC1-early pre-onset	28	0.467931	0.786398	40.2449	41.75
84	NEC1-late pre-onset	17	0.492361	0.766331	32.2572	22
85	NEC2-early disease	76	0.204495	0.948095	142.31	112.25
86	NEC2-early post partum	184	3.08923	0.085687	253.457	229.15
87	NEC2-early pre-onset	195	3.07541	0.107892	225.915	230.221
88	NEC2-late pre-onset	129.5	1.70813	0.513948	153.2	147.428
89	NEC3-early disease	42	0.798844	0.614097	119.078	73.6875
90	NEC3-early post partum	193	3.14204	0.080324	225.137	217.667
91	NEC3-early pre-onset	139	1.97809	0.367605	189.008	168.322
92	NEC3-late pre-onset	62.6667	0.952321	0.554474	98.4501	73.3222
93	NEC4-early disease	30	0.765498	0.685923	34.8672	35
94	NEC4-early post partum	203	3.18151	0.085709	222.031	218.536
95	NEC4-early pre-onset	38.5	0.874966	0.575406	113.344	67.5833
96	NEC4-late pre-onset	51	1.11588	0.476439	70.0884	66.1111

## Sheet: sobs
	Control1	Control2	Control3	Control4	Control5	Control6	Control7	Control8	Control9	Control10	Control11	Control12	Control13	Control14	Control15	Control16	Control17	LOS1	LOS2	LOS3	NEC1	NEC2	NEC3	NEC4
early post partum	195	184	208.5	209	205	201	199.5	196	124	163	187	209	111.5	181	183	200.5	184	183.5	177	127	191	184	193	203
early pre-onset	120.5	188	194.5	91	152	215.5	134.5	188	94	72	45	109	103	57	168	133.5	65	185	203	106	28	195	139	38.5
late pre-onset	23.5	185	56	29	80	52.5	68	18	190	54	26	54	57	36	18	44.5	46	73.5	15	42.5	17	129.5	62.6667	51
early disease	33	81	31	52.5	57	48	43.5	30	35	49	30	70	58	49	25.6667	40	43	37	56	35	58.6667	76	42	30
Table Analyzed	NECvsLOSvscontrol_sobs
Two-way RM ANOVA	Matching: Stacked
Alpha	0.05
Source of Variation	% of total variation	P value	P value summary	Significant?
Interaction	2.258	0.3463	ns	No
Time	38.35	<0.0001	****	Yes
Disease	0.01	0.9904	ns	No
Subjects (matching)	10.85	0.0853	ns	No
ANOVA table	SS	DF	MS	F (DFn, DFd)	P value
Interaction	9896	6	1649	F (6, 63) = 1.147	P=0.3463
Time	168046	3	56015	F (3, 63) = 38.94	P<0.0001
Disease	43.84	2	21.92	F (2, 21) = 0.009678	P=0.9904
Subjects (matching)	47565	21	2265	F (21, 63) = 1.575	P=0.0853
Residual	90624	63	1438
Number of missing values	0
Source of Variation	DF	Sum of Squares	Mean Square					Within each row, compare columns (simple effects within rows)
Interaction	6	9896	1649
Time	3	168046	56015					Number of families	1
Disease	2	43.84	21.92					Number of comparisons per family	12
Subjects (matching)	21	47565	2265					Alpha	0.05
Residual (Error)	63	90624	1438
Total	95	438226						Sidak's multiple comparisons test	Mean Diff.	95.00% CI of diff.	Significant?	Summary	Adjusted P Value
								early post partum
Does Time have the same effect at all values of Disease?								Control vs. LOS	22.26	-52.36 to 96.88	No	ns	0.997
Interaction accounts for 2.26% of the total variance.								Control vs. NEC	-7.985	-74.2 to 58.23	No	ns	>0.9999
F = 1.15. DFn=6 DFd=63								LOS vs. NEC	-30.25	-121.3 to 60.76	No	ns	0.9921
The P value = 0.3463
If there is no interaction overall, there is a 35% chance of randomly observing so much								early pre-onset
interaction in an experiment of this size. The interaction is considered not significant.								Control vs. LOS	-39.34	-114 to 35.28	No	ns	0.799
								Control vs. NEC	25.2	-41.02 to 91.42	No	ns	0.9759
								LOS vs. NEC	64.54	-26.47 to 155.6	No	ns	0.3892
Does Disease affect the result? (Are the curves different?)
Disease accounts for <0.1% of the total variance (after adjusting for matching).								late pre-onset
F = 0.01. DFn=2 DFd=21								Control vs. LOS	17.36	-57.26 to 91.98	No	ns	0.9997
The P value = 0.9904								Control vs. NEC	-4.012	-70.23 to 62.21	No	ns	>0.9999
If Disease has no effect overall, there is a 99% chance of randomly observing an								LOS vs. NEC	-21.38	-112.4 to 69.63	No	ns	0.9997
effect this big (or bigger) in an experiment of this size. The effect is considered not significant.
								early disease
								Control vs. LOS	2.961	-71.66 to 77.58	No	ns	>0.9999
Does Time affect the result? (Are the curves horizontal?)								Control vs. NEC	-6.039	-72.26 to 60.18	No	ns	>0.9999
Time accounts for 38.35% of the total variance (after adjusting for matching).								LOS vs. NEC	-9	-100 to 82.01	No	ns	>0.9999
F = 38.94. DFn=3 DFd=63
The P value is <0.0001
If Time has no effect overall, there is a less than 0.01% chance of randomly observing an								Test details	Mean 1	Mean 2	Mean Diff.	SE of diff.	N1	N2	t	DF
effect this big (or bigger) in an experiment of this size. The effect is considered extremely significant.
								early post partum
								Control vs. LOS	184.8	162.5	22.26	25.4	17	3	0.8766	84
Was the matching effective?								Control vs. NEC	184.8	192.8	-7.985	22.54	17	4	0.3543	84
F = 1.57. DFn=21 DFd=63								LOS vs. NEC	162.5	192.8	-30.25	30.98	3	4	0.9765	84
The P value = 0.0853
If matching were not effective overall, there is a 8.5% chance of randomly observing an								early pre-onset
effect this big (or bigger) in an experiment of this size. The effect is considered not quite significant.								Control vs. LOS	125.3	164.7	-39.34	25.4	17	3	1.549	84
								Control vs. NEC	125.3	100.1	25.2	22.54	17	4	1.118	84
								LOS vs. NEC	164.7	100.1	64.54	30.98	3	4	2.083	84
								late pre-onset
								Control vs. LOS	61.03	43.67	17.36	25.4	17	3	0.6836	84
								Control vs. NEC	61.03	65.04	-4.012	22.54	17	4	0.178	84
								LOS vs. NEC	43.67	65.04	-21.38	30.98	3	4	0.69	84
								early disease
								Control vs. LOS	45.63	42.67	2.961	25.4	17	3	0.1166	84
								Control vs. NEC	45.63	51.67	-6.039	22.54	17	4	0.2679	84
								LOS vs. NEC	42.67	51.67	-9	30.98	3	4	0.2905	84

## Sheet: shannon
	Control1	Control2	Control3	Control4	Control5	Control6	Control7	Control8	Control9	Control10	Control11	Control12	Control13	Control14	Control15	Control16	Control17	LOS1	LOS2	LOS3	NEC1	NEC2	NEC3	NEC4
early post partum	3.17429	2.88035	3.15529	3.16316	3.19516	3.02129	2.92779	3.09894	0.807178	1.91323	2.77828	2.99913	1.45093	3.04951	3.02391	3.21961	2.86014	3.12835	3.17108	1.89104	3.15172	3.08923	3.14204	3.18151
early pre-onset	1.65809	2.822	3.24957	0.766875	2.6341	3.07852	1.92397	3.03926	0.621595	0.868205	0.515752	1.34008	1.28238	0.347442	1.99539	2.04665	0.923024	3.06518	3.1477	1.84001	0.467931	3.07541	1.97809	0.874966
late pre-onset	0.551528	2.79893	0.41701	0.802747	1.30962	1.03929	1.00092	0.738993	2.87642	1.63322	0.463656	1.40567	1.3527	1.03913	0.318218	1.21934	1.60678	0.822196	0.36779	0.649409	0.492361	1.70813	0.952321	1.11588
early disease	0.365138	0.507628	0.812926	1.08621	1.00776	1.30443	0.615417	1.04574	0.469488	1.86998	1.07262	1.69088	1.72332	1.0561	0.571535	1.06844	1.59641	0.343211	0.539878	0.557306	0.566656	0.204495	0.798844	0.765498
Table Analyzed	NECvsLOSvscontrol_shannon
Two-way RM ANOVA	Matching: Stacked
Alpha	0.05
Source of Variation	% of total variation	P value	P value summary	Significant?
Interaction	5.223	0.1449	ns	No
Time	41.29	<0.0001	****	Yes
Disease	0.1022	0.8872	ns	No
Subjects (matching)	8.915	0.6964	ns	No
ANOVA table	SS	DF	MS	F (DFn, DFd)	P value
Interaction	5.285	6	0.8809	F (6, 63) = 1.663	P=0.1449
Time	41.78	3	13.93	F (3, 63) = 26.29	P<0.0001
Disease	0.1034	2	0.05169	F (2, 21) = 0.1203	P=0.8872
Subjects (matching)	9.021	21	0.4296	F (21, 63) = 0.8109	P=0.6964
Residual	33.37	63	0.5297
Number of missing values	0
Source of Variation	DF	Sum of Squares	Mean Square						Within each row, compare columns (simple effects within rows)
Interaction	6	5.285	0.8809
Time	3	41.78	13.93						Number of families	1
Disease	2	0.1034	0.05169						Number of comparisons per family	12
Subjects (matching)	21	9.021	0.4296						Alpha	0.05
Residual (Error)	63	33.37	0.5297
Total	95	101.2							Sidak's multiple comparisons test	Mean Diff.	95.00% CI of diff.	Significant?	Summary	Adjusted P Value
									early post partum
Does Time have the same effect at all values of Disease?									Control vs. LOS	0.01797	-1.289 to 1.325	No	ns	>0.9999
Interaction accounts for 5.22% of the total variance.									Control vs. NEC	-0.393	-1.553 to 0.7668	No	ns	0.9906
F = 1.66. DFn=6 DFd=63									LOS vs. NEC	-0.411	-2.005 to 1.183	No	ns	0.9992
The P value = 0.1449
If there is no interaction overall, there is a 14% chance of randomly observing so much									early pre-onset
interaction in an experiment of this size. The interaction is considered not significant.									Control vs. LOS	-0.9718	-2.279 to 0.3352	No	ns	0.3208
									Control vs. NEC	0.1134	-1.046 to 1.273	No	ns	>0.9999
									LOS vs. NEC	1.085	-0.5088 to 2.679	No	ns	0.4509
Does Disease affect the result? (Are the curves different?)
Disease accounts for 0.10% of the total variance (after adjusting for matching).									late pre-onset
F = 0.12. DFn=2 DFd=21									Control vs. LOS	0.5971	-0.7098 to 1.904	No	ns	0.9117
The P value = 0.8872									Control vs. NEC	0.1431	-1.017 to 1.303	No	ns	>0.9999
If Disease has no effect overall, there is a 89% chance of randomly observing an									LOS vs. NEC	-0.454	-2.048 to 1.14	No	ns	0.998
effect this big (or bigger) in an experiment of this size. The effect is considered not significant.
									early disease
									Control vs. LOS	0.5707	-0.7363 to 1.878	No	ns	0.9344
Does Time affect the result? (Are the curves horizontal?)									Control vs. NEC	0.467	-0.6929 to 1.627	No	ns	0.963
Time accounts for 41.29% of the total variance (after adjusting for matching).									LOS vs. NEC	-0.1037	-1.698 to 1.49	No	ns	>0.9999
F = 26.29. DFn=3 DFd=63
The P value is <0.0001
If Time has no effect overall, there is a less than 0.01% chance of randomly observing an									Test details	Mean 1	Mean 2	Mean Diff.	SE of diff.	N1	N2	t	DF
effect this big (or bigger) in an experiment of this size. The effect is considered extremely significant.
									early post partum
									Control vs. LOS	2.748	2.73	0.01797	0.4449	17	3	0.0404	84
Was the matching effective?									Control vs. NEC	2.748	3.141	-0.393	0.3948	17	4	0.9955	84
F = 0.81. DFn=21 DFd=63									LOS vs. NEC	2.73	3.141	-0.411	0.5426	3	4	0.7574	84
The P value = 0.6964
If matching were not effective overall, there is a 70% chance of randomly observing an									early pre-onset
effect this big (or bigger) in an experiment of this size. The effect is considered not significant.									Control vs. LOS	1.713	2.684	-0.9718	0.4449	17	3	2.184	84
									Control vs. NEC	1.713	1.599	0.1134	0.3948	17	4	0.2873	84
									LOS vs. NEC	2.684	1.599	1.085	0.5426	3	4	2	84
									late pre-onset
									Control vs. LOS	1.21	0.6131	0.5971	0.4449	17	3	1.342	84
									Control vs. NEC	1.21	1.067	0.1431	0.3948	17	4	0.3624	84
									LOS vs. NEC	0.6131	1.067	-0.454	0.5426	3	4	0.8368	84
									early disease
									Control vs. LOS	1.051	0.4801	0.5707	0.4449	17	3	1.283	84
									Control vs. NEC	1.051	0.5839	0.467	0.3948	17	4	1.183	84
									LOS vs. NEC	0.4801	0.5839	-0.1037	0.5426	3	4	0.1912	84
