# Supplementary material for: Patterned progression of gut microbiota associated with necrotizing enterocolitis and late onset sepsis in preterm infants: a prospective study in a Chinese neonatal intensive care unit
Source: PeerJ. 2019 Jul 22;7:e7310. doi: 10.7717/peerj.7310 (PMC6657676; doi:10.7717/peerj.7310)
Supplement: Dataset S2 — Zero-Inflated Beta Regression Model with Random Effects (ZIBR) and Linear Mixed-effects Model (LME) were used to test the association between OTU relative abundance and clinical covariates (diseases-related time intervals) for longitudinal microbiome data. In the manuscript, only ZIBR results were reported. [file peerj-07-7310-s006.xlsx]

## Sheet: note
Info about ZIBR model: https://github.com/chvlyl/ZIBR
The following tests were performed:
CTL vs LOS vs NEC, ZIBR model
CTL vs LOS vs NEC, LME model
CTL vs LOS, ZIBR model
CTL vs LOS, LME model
CTL vs NEC, ZIBR model
CTL vs NEC, ZIBR model
p values showing the effect of treat (i.e. disease) were adjusted with FDR.
OTU data was converted to relative abundance, and filtered before modeling to reduce noise.
Filter threshold: OTUs that were present in more than 50% of the samples with average relative abundances higher than 0.05% in at least one group were kept.

## Sheet: filtered matrix_CTLvsLOSvsNEC
	OTU317	OTU57	OTU30	OTU738	OTU736	OTU128	OTU322	OTU25	OTU861	OTU1243	OTU1026	OTU1111	OTU46	OTU729	OTU384	OTU1028	OTU234	OTU730	OTU85	OTU48	OTU19	OTU1041	OTU525	OTU718	OTU1069	OTU870	OTU288	OTU444	OTU84	OTU714	OTU108	OTU325	OTU51	OTU1105	OTU734	OTU728	OTU731	OTU78	OTU228	OTU401	OTU724	OTU1184	OTU1113	OTU125	OTU1021	OTU274	OTU802	OTU752	OTU862
control1-early disease	0	0	0.000321497	0	0	0	0	0.00339358	7.14439e-05	7.14439e-05	0	0	0	3.57219e-05	0	0	7.14439e-05	3.57219e-05	0	0	3.57219e-05	0	0	0	7.14439e-05	0	3.57219e-05	0	0	3.57219e-05	0	0.000107166	0.000321497	0	0	3.57219e-05	0	0	0	0.000107166	3.57219e-05	0	3.57219e-05	3.57219e-05	0	0	0	7.14439e-05	0.0980567
control1-early post partum	0.00150032	0.00101808	0.177717	0.000321497	0.0107702	0.00428663	0.0007323	0.000446524	0.00142888	0.00101808	0.0091984	0.00182182	0.00955562	0.00810888	0.00017861	0.00126813	0.0229692	0.0116811	0.00196471	0.00275059	0.000142888	0.00169679	0.000607273	0.0032507	0.042777	0.00142888	0.0014646	0.000142888	0.000964492	0.00728728	0.000303636	0.055119	0.000357219	0.00117882	0.00721583	0.0127885	0.0109488	0.000107166	0.000267915	0.125848	0.00232193	7.14439e-05	0.00151818	0.00262556	0.000250054	0.0007323	0.000839466	0.0241123	0.00834107
control1-early pre-onset	0.000714439	0.000517968	0.0890369	0.000125027	0.00605487	0.00189326	0.00055369	0.000267915	0.494892	3.57219e-05	0.00539401	0.00196471	0.00532257	0.0036615	0.000214332	0.00055369	0.015164	0.00685861	0.00116096	0.000982353	5.35829e-05	0.00100021	0.000232193	0.000678717	0.0221655	0.000768022	0.000625134	0.00275059	0.000642995	0.00434022	0.00017861	0.0271487	5.35829e-05	0.000946631	0.00380439	0.00650139	0.00739444	8.93049e-05	0.000160749	0.0688183	0.00148246	8.93049e-05	0.000607273	0.00151818	0.000428663	0.000392941	0.000482246	0.011181	0.00175038
control1-late pre-onset	0	0	5.35829e-05	0	0	0	0	7.14439e-05	0.366739	0	0	0	0	1.7861e-05	0	0	1.7861e-05	0	0	7.14439e-05	0	0	1.7861e-05	0	0	0	0	0.0139851	0	0	0	1.7861e-05	0.000214332	0	0	0	0	0	0	5.35829e-05	1.7861e-05	1.7861e-05	0	0	0	0	0	7.14439e-05	0.0568157
control10-early disease	0	0	0.000714439	0	0	0	0	0.000321497	3.57219e-05	3.57219e-05	0	0	0	3.57219e-05	0	0	0	0	0	0.00307209	0.0022862	0	0	0.193899	0.000285776	0	0	0	0	0.115203	0	0.00017861	0.00328642	0.000250054	0	0	0	0	0	0	0.00864471	0	0	3.57219e-05	0	0	0	0	0.0114667
control10-early post partum	0.00139316	0.00125027	0.143638	0	0	0.00357219	0.000857327	3.57219e-05	3.57219e-05	0	0.0163964	0	0.0102879	0.00367936	0.00157177	0.00350075	0.000392941	0	0.000571551	0.0132886	0	0.00278631	0.00282203	0.000107166	0.0150032	0.00153604	0.00117882	0	0.00271487	0.00100021	3.57219e-05	0.0186111	0.000107166	0.00103594	3.57219e-05	0	0	0.0011431	0.00121455	0.00017861	0.582303	0	0.00092877	0.00425091	0.00242909	0.00128599	0.00189326	0.000107166	3.57219e-05
control10-early pre-onset	0	7.14439e-05	0.00250054	0	0	3.57219e-05	0	0.210188	0.00185754	0	0.000500107	0	0.000357219	0.000142888	7.14439e-05	3.57219e-05	3.57219e-05	0	0	0.0183968	0.0125384	3.57219e-05	0	3.57219e-05	0.000285776	3.57219e-05	0	0.000714439	0.000142888	7.14439e-05	0	0.000607273	0	3.57219e-05	0	0	0	3.57219e-05	3.57219e-05	0	0.730192	0.000142888	7.14439e-05	7.14439e-05	3.57219e-05	0	0	0	7.14439e-05
control10-late pre-onset	0	0	0.000642995	0	0	0	0	0.00132171	0.00017861	0	3.57219e-05	0	0	3.57219e-05	3.57219e-05	0	0	0	0	0.00778738	0.00200043	3.57219e-05	0	0.260056	3.57219e-05	0	0	0.000142888	0	0.0705151	0	7.14439e-05	0.00771594	0.00492963	0	0	0	0	0	0	0.349718	3.57219e-05	0	0	0	0	0	0	0.00150032
control11-early disease	0.000107166	0	0.000321497	0	0	0	0	0.00250054	0	7.14439e-05	3.57219e-05	0	3.57219e-05	0	0	0	0	0	0	0.0120026	0.000750161	0	0	0.000321497	0	0	0	0	0	0	0	7.14439e-05	0.00342931	0	0	0	0	0	0	0	0.0312567	0	3.57219e-05	3.57219e-05	0	0	0	0	0.0362578
control11-early post partum	0.00378653	0.00267915	0.259699	0	0	0.00539401	0.00128599	0.240659	0.00017861	0	0.0344717	0	0.017861	0.00653712	0.00300064	0.00364364	0.000642995	0	0.000500107	0.000392941	0	0.00482246	0.00335786	3.57219e-05	0.0286847	0.00289348	0.0014646	0	0.00592984	0.0011431	0.000142888	0.0377938	0.000142888	0.000857327	3.57219e-05	7.14439e-05	0	0.00117882	0.00221476	0.000285776	0.000607273	0	0.00217904	0.0078231	0.00389369	0.00214332	0.00335786	3.57219e-05	3.57219e-05
control11-early pre-onset	0	3.57219e-05	0.00103594	0	0	3.57219e-05	0	0.0422948	0	7.14439e-05	0.000107166	0	0	0	3.57219e-05	3.57219e-05	0	0	0	0.0047153	0	3.57219e-05	0	3.57219e-05	0.000107166	0	0	0	0	3.57219e-05	0	0.000142888	0.000642995	0	0	0	0	0	0	0	7.14439e-05	0	0	0	3.57219e-05	0	3.57219e-05	0	0.0735158
control11-late pre-onset	0	0	0.000214332	0	0	0	3.57219e-05	0.000250054	0	0.000107166	0	3.57219e-05	0	0	0	0	0	0	0	0.0356505	0	3.57219e-05	0	3.57219e-05	0	0	0	0	0	0	0	3.57219e-05	0.000750161	0.000107166	0	0	0	0	0	0	0.000214332	0	0	0	0	0	0	0	0.0808745
control12-early disease	0	3.57219e-05	0.000750161	0.000107166	0	3.57219e-05	0	0.0129671	0	0	0	0	3.57219e-05	0	0	3.57219e-05	0.000214332	0	0	0.00507252	0.00657284	0	0	0.0729085	0.00017861	0	3.57219e-05	0	0	0.000321497	0	0.000250054	0.000142888	0	0	0	0	0	0	0	0.0194327	0	0	0	0	0	0	7.14439e-05	0.0147532
control12-early post partum	0.00128599	0.00214332	0.333107	0	0.0014646	0.00843038	0.00250054	7.14439e-05	0.000678717	0.000142888	0.0214689	0.00250054	0.0139316	0.0123598	0.00132171	0.00539401	0.0561192	0.00335786	0.00389369	0.000357219	0	0.00482246	0.00210759	0.00017861	0.085947	0.00217904	0.00225048	7.14439e-05	0.0026077	0.0108237	0.00092877	0.0864114	3.57219e-05	0.00217904	0.000785883	0.0014646	3.57219e-05	0.000750161	0.00142888	0.00625134	0.00107166	7.14439e-05	0.00167893	0.00810888	0.00132171	0.00160749	0.00142888	0.00685861	0.000821605
control12-early pre-onset	0.000125027	0.000250054	0.0483854	0.000125027	0.000250054	0.00126813	0.000285776	0.275684	0.0112703	8.93049e-05	0.00310781	0.000946631	0.00160749	0.00169679	0.00017861	0.000642995	0.00871615	0.000446524	0.000392941	0.00139316	0.0150747	0.00092877	0.000107166	0.00221476	0.0100557	0.00037508	0.000339358	0.000250054	0.000250054	0.00555476	0.00017861	0.0134136	0.000196471	0.000267915	0.000142888	0.000214332	1.7861e-05	0.000214332	0.000214332	0.000821605	0.000517968	1.7861e-05	0.000500107	0.00117882	0.000142888	8.93049e-05	0.000250054	0.00100021	0.0504572
control12-late pre-onset	0	0	0.00121455	0.00175038	0	0	0	0.00378653	0	0	0	0	3.57219e-05	7.14439e-05	0	0	0.00017861	0	0	0.0217547	0.000464385	0	0	0.0430449	0.000321497	0	0	0	0	0	0	0.000142888	0.000500107	0	0	0	0	0	0	0	0.0108952	0	0	0	0	0	0	0	0.065907
control13-early disease	0	0	0.000464385	0	0	3.57219e-05	0	0.00017861	3.57219e-05	0	3.57219e-05	0	3.57219e-05	3.57219e-05	3.57219e-05	0	0.000142888	3.57219e-05	3.57219e-05	0.357469	0.00353647	7.14439e-05	0	0.0704079	7.14439e-05	3.57219e-05	3.57219e-05	0	0	0.000357219	0	0.000214332	7.14439e-05	0	0	0	0	0	0	0	0.0170394	0	0	0	0	0	0	0	0.0405801
control13-early post partum	5.35829e-05	7.14439e-05	0.0256662	5.35829e-05	0.000107166	0.000410802	0.000142888	0.000875188	0.388101	8.93049e-05	0.00103594	0.000214332	0.000642995	0.000696578	8.93049e-05	0.000428663	0.00189326	0.000107166	0.000250054	1.7861e-05	0	0.000446524	8.93049e-05	1.7861e-05	0.00496535	5.35829e-05	0.000160749	0.0791955	0.000125027	0.000839466	0.00037508	0.00491177	7.14439e-05	7.14439e-05	5.35829e-05	7.14439e-05	0	7.14439e-05	0.000107166	0.000285776	5.35829e-05	0.140423	0.000107166	0.00055369	3.57219e-05	1.7861e-05	5.35829e-05	0.000446524	8.93049e-05
control13-early pre-onset	0.000196471	1.7861e-05	0.0229692	3.57219e-05	7.14439e-05	0.000303636	5.35829e-05	0.128313	0.0798385	5.35829e-05	0.0010538	0.000607273	0.000857327	0.000946631	0.00017861	0.000464385	0.0037508	0.000321497	0.000160749	0.00262556	0.000428663	0.000392941	0.00017861	7.14439e-05	0.00442952	0.000232193	8.93049e-05	0.0144495	8.93049e-05	0.0114489	0.000250054	0.00676931	0.000160749	0.167018	3.57219e-05	0.000107166	0	3.57219e-05	5.35829e-05	0.000392941	8.93049e-05	5.35829e-05	3.57219e-05	0.000642995	0.000107166	3.57219e-05	8.93049e-05	0.000500107	0.0512253
control13-late pre-onset	0	3.57219e-05	0.000571551	0	0	0	3.57219e-05	0.0118597	7.14439e-05	0	0	0	0	0	0	3.57219e-05	3.57219e-05	0	0	0.118811	0.00257198	0	0	0.0292205	3.57219e-05	0	3.57219e-05	0	0	7.14439e-05	0	0.000214332	0.000464385	0	0	0	0	3.57219e-05	0	0	0.0419733	0	0	0	0	0	0	3.57219e-05	0.0749446
control14-early disease	0	0	0.000857327	0	0	0	3.57219e-05	0.000142888	3.57219e-05	0.0497607	0	0	3.57219e-05	3.57219e-05	0	0	0	0	0	0.000214332	0.000571551	3.57219e-05	0	0.068479	3.57219e-05	0	0	0	3.57219e-05	0.00957348	0	0.00017861	0.010538	0	0	0	0	0	0	0	0.0164678	0	0	0	0	0	0	0	0.00310781
control14-early post partum	0.00446524	0.00339358	0.294385	0	7.14439e-05	0.00650139	0.00189326	0.000142888	3.57219e-05	7.14439e-05	0.0402229	0	0.0250054	0.00925198	0.00542973	0.00503679	0.00110738	0	0.00182182	0.000250054	0	0.00689433	0.0052154	7.14439e-05	0.0876259	0.00417947	0.00221476	0	0.00793027	0.00207187	7.14439e-05	0.0480817	0.000285776	0.00217904	0.000107166	0	0	0.00460813	0.0032507	0.000214332	0.000535829	0	0.00214332	0.0112881	0.00682289	0.00450096	0.00425091	0.000285776	0.000250054
control14-early pre-onset	3.57219e-05	0	0.00250054	0	0	3.57219e-05	7.14439e-05	0.0183254	0.000142888	0	0.000392941	0	0.000285776	0	0	3.57219e-05	0	0	0	0.0119311	0.0224334	0	3.57219e-05	0	0.000392941	0	0	0	7.14439e-05	0.000571551	0	0.000357219	0	3.57219e-05	0	0	0	3.57219e-05	0	0	0.937487	3.57219e-05	0	0.00017861	0.000107166	0	3.57219e-05	0	3.57219e-05
control14-late pre-onset	0	0	0.000214332	0	0	3.57219e-05	0	0	3.57219e-05	0.0278988	3.57219e-05	0	0	3.57219e-05	0	0	0	0	0	3.57219e-05	0.000214332	0	3.57219e-05	0.0103236	3.57219e-05	0	0	0	0	0.00482246	0	0	0.00592984	3.57219e-05	0	0	0	0	3.57219e-05	0	0.00596556	0	0	0	0	0	0	0	0.0138958
control15-early disease	0	0	0.000238146	0	0	1.19073e-05	0	0.00681098	5.95366e-05	1.19073e-05	0	0	0	0	0	0	4.76293e-05	0	0	0.162166	0.00222667	0	1.19073e-05	0	7.14439e-05	0	0	1.19073e-05	0	7.14439e-05	0	8.33512e-05	0.000321497	0	0	1.19073e-05	2.38146e-05	0	0	0.00017861	0.000214332	0	0	0	0	0	0	4.76293e-05	0.0765283
control15-early post partum	0.0037508	0.00289348	0.340644	0	0	0.00642995	0.00310781	0	0.000214332	3.57219e-05	0.0411874	0	0.0248267	0.0107523	0.00557262	0.00542973	0.00189326	0	0.00221476	0.000535829	0	0.00696578	0.00589412	7.14439e-05	0.0316854	0.00332214	0.00603701	0	0.00743016	0.00221476	3.57219e-05	0.0450811	0.000142888	0.00250054	0.000142888	3.57219e-05	0.000428663	0.00482246	0.00300064	0.000357219	0.000464385	0.000107166	0.00221476	0.0099307	0.00546546	0.00400086	0.00425091	0.000428663	0.00171465
control15-early pre-onset	0.00110738	0.000750161	0.089412	0	0	0.00150032	0.000821605	0.182075	3.57219e-05	0	0.011181	0	0.007323	0.00342931	0.00139316	0.00135743	0.000714439	0	0.000642995	0.000107166	0.00200043	0.00200043	0.0017861	0.00017861	0.0103951	0.00107166	0.000750161	0	0.00264342	0.000607273	0	0.0128956	0.000392941	0.000893049	3.57219e-05	0	0	0.0011431	0.000964492	3.57219e-05	0.000107166	0.000464385	0.000821605	0.0029292	0.00203615	0.00121455	0.00135743	0.000107166	0.0382225
control15-late pre-onset	0	0	3.57219e-05	0	0	0	0	0.00896621	0	0	0	0	0	0	0	0	0	0	0	0	0.00017861	0	0	0	0	0	0	0	0	0	0	7.14439e-05	0.000500107	0	0	0	0	0	0	0	0	0	0	0	0	0	0	0	0.0701936
control16-early disease	0	0	8.93049e-05	0.000303636	0	0	0	0.000250054	0.000142888	0.0054476	0	0	0	0	0	0	0	1.7861e-05	0	0.0429914	0.00278631	0	0	0.0743374	3.57219e-05	0	0	5.35829e-05	0	0.00153604	0	3.57219e-05	0.000964492	0	0	0	0	0	0	3.57219e-05	0.00153604	0	0	0	1.7861e-05	0	0	0	0.000982353
control16-early post partum	0.00185754	0.00101808	0.182593	0.00135743	0.0121633	0.00455455	0.00151818	0.000571551	0.00210759	7.14439e-05	0.0104665	0.00428663	0.0106809	0.00839466	0.000267915	0.00130385	0.0312746	0.0125384	0.0025184	0.00671572	3.57219e-05	0.00194685	0.000803744	0.000303636	0.0412946	0.0014646	0.00116096	0.00017861	0.00162535	0.00826963	0.000946631	0.0551904	0.000142888	0.00289348	0.00712653	0.0136994	0.0135029	0.000410802	0.000250054	0.136654	0.00107166	0.000196471	0.00132171	0.00337572	0.000464385	0.000607273	0.000803744	0.0244338	0.00507252
control16-early pre-onset	0.000446524	0.000267915	0.0517254	0.000589412	0.00305423	0.00119669	0.000696578	0.000250054	0.00169679	0.0373473	0.00287562	0.000500107	0.00303636	0.00266128	0.000125027	0.000642995	0.00909123	0.0040723	0.0007323	0.000303636	3.57219e-05	0.000357219	0.000107166	0.0629421	0.012717	0.000410802	0.000321497	5.35829e-05	0.000339358	0.00696578	0.000267915	0.0165393	0.00760877	0.000428663	0.00216118	0.00403658	0.00342931	0.000125027	0.000125027	0.0357398	0.00055369	1.7861e-05	0.000535829	0.0010538	0.000142888	0.000107166	0.000214332	0.00721583	0.038151
control16-late pre-onset	0	0	0.000714439	0	0	1.7861e-05	1.7861e-05	0.000285776	0.00560834	0.0372401	5.35829e-05	0	1.7861e-05	1.7861e-05	0	0	0	0	0	0.0392584	0.000857327	1.7861e-05	0	0.137726	0.000107166	0	0	0.000303636	0	7.14439e-05	0	0.000232193	0.00734086	0	0	0	0	0	0	5.35829e-05	0.00125027	7.14439e-05	0	0	0	0	0	1.7861e-05	0.00453669
control17-early disease	3.57219e-05	0	0.000678717	0	0	3.57219e-05	0	0.00017861	3.57219e-05	0	3.57219e-05	0	0	0.000107166	0	7.14439e-05	0	0	0	0.0221476	0.000142888	0	0	0.274952	3.57219e-05	0	0	0	3.57219e-05	0.133779	0	0.00017861	0.0294706	0	0	0	0	0	0	0	0.0465457	0	0	0	0	0	0	0	0.0204687
control17-early post partum	0.00478674	0.00342931	0.375116	0	0	0.00400086	0.00275059	0.00250054	0.000893049	0	0.0375795	0	0.0231121	0.0099307	0.00592984	0.00289348	0.00200043	0	0.00189326	0.00017861	0.00171465	0.00775166	0.00660856	3.57219e-05	0.01311	0.00300064	0.00425091	0.000214332	0.00650139	0.00214332	3.57219e-05	0.0474745	3.57219e-05	0.0026077	3.57219e-05	0	0	0.00410802	0.00328642	0.000357219	0.000250054	0	0.00235765	0.0101093	0.00621562	0.00207187	0.00453669	0.000107166	0.000357219
control17-early pre-onset	3.57219e-05	0	0.00400086	0	0	0	0	0.098021	7.14439e-05	0	0.000607273	0	0.000321497	0	3.57219e-05	0	0	0	0	0.0834107	0.0078231	0	0.000107166	0	0.000107166	7.14439e-05	0	0	0.000214332	0.000464385	0	0.000535829	0	0	0	0	0	3.57219e-05	0	0	0.760663	0	0	3.57219e-05	7.14439e-05	0	0.000107166	0	0
control17-late pre-onset	0	0	0.000714439	0	0	3.57219e-05	0	0.00718011	0.0288633	0	7.14439e-05	0	3.57219e-05	7.14439e-05	0	3.57219e-05	0	0	0	0.188612	0.000642995	0	0	0	0	0	0	0.00757305	0	0.289026	0	3.57219e-05	0	0	0	0	0	0	0	0	0.378581	0	0	3.57219e-05	0	0	7.14439e-05	0	3.57219e-05
control2-early disease	0.000107166	0.000250054	0.00803744	0	0	0.000357219	0.000107166	0.00428663	7.14439e-05	7.14439e-05	0.00139316	0	0.000642995	0.000392941	0.000107166	0.00017861	3.57219e-05	0	7.14439e-05	0	0	0.000107166	0.000285776	0	0.00160749	0.000142888	0.000142888	0	0.000392941	7.14439e-05	0	0.00139316	0.000428663	3.57219e-05	0	0	0	0.00017861	3.57219e-05	3.57219e-05	0.000107166	3.57219e-05	7.14439e-05	0.000321497	0.000214332	0.000250054	7.14439e-05	0	0.0729085
control2-early post partum	0.00421519	0.00296492	0.368936	0	0	0.00425091	0.00239337	7.14439e-05	0.000357219	3.57219e-05	0.0421162	0	0.0255412	0.0100736	0.00464385	0.00246481	0.00310781	3.57219e-05	0.00271487	0.000285776	0	0.00753733	0.00607273	3.57219e-05	0.0193256	0.0032507	0.00492963	3.57219e-05	0.00889476	0.00242909	0.000107166	0.0475102	7.14439e-05	0.00214332	7.14439e-05	0.000107166	0.000107166	0.00746589	0.00346503	0.000142888	0.000714439	7.14439e-05	0.00264342	0.0109666	0.00614417	0.00282203	0.00421519	7.14439e-05	0
control2-early pre-onset	0.00339358	0.00264342	0.264664	3.57219e-05	3.57219e-05	0.00253626	0.00196471	0.230907	0.000321497	3.57219e-05	0.0335786	3.57219e-05	0.0203972	0.00839466	0.00353647	0.00160749	0.00207187	0	0.00142888	0.000392941	0	0.00596556	0.00500107	0	0.031471	0.00253626	0.00210759	0	0.00539401	0.00121455	7.14439e-05	0.0335072	7.14439e-05	0.00242909	0	7.14439e-05	0	0.00657284	0.00210759	0.00017861	7.14439e-05	0.000500107	0.00246481	0.00807316	0.00475102	0.00132171	0.00303636	0.00017861	3.57219e-05
control2-late pre-onset	0.00185754	0.0032507	0.301172	0	3.57219e-05	0.00364364	0.00192898	0.178145	0.0011431	3.57219e-05	0.032507	7.14439e-05	0.0212903	0.00857327	0.00332214	0.00235765	0.000893049	0	0.000464385	0.000107166	0	0.00546546	0.00517968	0	0.0541187	0.00200043	0.00457241	0.000142888	0.00400086	0.00160749	0.000250054	0.0367222	0	0.000500107	0.00017861	7.14439e-05	0	0.00150032	0.00250054	0.000214332	0.000142888	0.000107166	0.00192898	0.00871615	0.00321497	0.00285776	0.00332214	0.000285776	0.000107166
control3-early disease	0	0	0.00017861	0.000357219	0	0	0	0.0166107	0.000321497	0	0	0	0	0	0	0	3.57219e-05	0	0	0.0120383	0	0	0	0.000214332	0	0	0	0	0	0	0	7.14439e-05	3.57219e-05	0.654712	0	0	0	0	0	0	0.000250054	0	0	0	0	0	0	0	0.000357219
control3-early post partum	0.00264342	0.00100021	0.251572	0.000339358	0.00566193	0.0052154	0.00180396	0.000196471	0.00100021	0.000500107	0.0122526	0.00469744	0.0101629	0.0102522	0.000714439	0.00446524	0.0384904	0.00743016	0.00257198	0.00189326	0.000107166	0.00376866	0.00092877	0.000571551	0.0643352	0.00110738	0.00169679	7.14439e-05	0.00132171	0.00796599	0.00225048	0.0589233	0.000750161	0.0014646	0.00339358	0.00616203	0.00734086	0.000607273	0.000893049	0.0631743	0.00417947	0.000125027	0.000785883	0.0059477	0.00133957	0.00164321	0.00119669	0.0133243	0.00514396
control3-early pre-onset	0.00428663	0.000410802	0.161945	0.000142888	0.0132171	0.00482246	0.00092877	0.00108952	0.00396514	8.93049e-05	0.00809102	0.00421519	0.00707294	0.00714439	0.000196471	0.00141102	0.0461885	0.0129135	0.00207187	0.00183968	0.000107166	0.00164321	0.000500107	0.00200043	0.0398121	0.00100021	0.00125027	0.000446524	0.00117882	0.00803744	0.00117882	0.0502072	3.57219e-05	0.012717	0.00671572	0.0151818	0.0175395	0.000267915	8.93049e-05	0.120311	0.00232193	0.000160749	0.00103594	0.0029292	0.00144674	0.000535829	0.000642995	0.020808	0.00509038
control3-late pre-onset	0	0	0.000500107	3.57219e-05	0	0	0	0.0350432	0.0260056	0	0	3.57219e-05	0	3.57219e-05	0	0	0.000107166	0.000142888	0	0.000142888	0	0	0	0	7.14439e-05	3.57219e-05	7.14439e-05	0.0070015	0	3.57219e-05	0	0.000392941	0	0.918733	3.57219e-05	3.57219e-05	7.14439e-05	0	0	0.00092877	0	0	3.57219e-05	0	0	0	0	0.000214332	0.000714439
control4-early disease	1.7861e-05	0	0.0022862	0.0629242	3.57219e-05	8.93049e-05	1.7861e-05	1.7861e-05	0	0.0511002	0.000142888	1.7861e-05	0.000125027	0.000107166	0	1.7861e-05	0.000392941	1.7861e-05	0	0.00944845	0	3.57219e-05	0	0.000232193	0.000589412	0	7.14439e-05	0	3.57219e-05	3.57219e-05	1.7861e-05	0.000875188	0.00825177	0	1.7861e-05	3.57219e-05	0	0	0	0	0.000214332	0	1.7861e-05	7.14439e-05	1.7861e-05	0	1.7861e-05	5.35829e-05	0.0139673
control4-early post partum	0.00303636	0.0011431	0.28724	0.00135743	0.00203615	0.00510824	0.00128599	0.000107166	0.00978781	0	0.0137529	0.00296492	0.00907337	0.0176109	0.000714439	0.00396514	0.103415	0.00507252	0.00232193	0.000321497	0	0.00475102	0.00132171	0.000107166	0.062049	0.00171465	0.00232193	0.00100021	0.00464385	0.0185754	0.0017861	0.0790884	0	0.000964492	0.00217904	0.00414375	0.000142888	0.000750161	0.00210759	0.0139316	0.00346503	0.00100021	0.000714439	0.00678717	0.00271487	0.00107166	0.00107166	0.00996642	0.00121455
control4-early pre-onset	8.93049e-05	7.14439e-05	0.0393299	5.35829e-05	5.35829e-05	0.000714439	0.000107166	3.57219e-05	0.394174	8.93049e-05	0.00176824	3.57219e-05	0.000714439	0.00119669	0.000107166	0.000410802	0.0014646	0.000214332	0.000125027	5.35829e-05	0	0.000517968	0.000125027	0.00169679	0.00753733	5.35829e-05	0.000339358	0.0120026	0.000160749	0.00107166	1.7861e-05	0.00980567	0.000125027	5.35829e-05	7.14439e-05	0.000142888	0	3.57219e-05	5.35829e-05	0.000571551	0.00107166	0.00334	0.000107166	0.0007323	8.93049e-05	0.000232193	8.93049e-05	0.00107166	0.0461885
control4-late pre-onset	0	0	3.57219e-05	0.0971994	0	0	0	0.00378653	0	0.00167893	0	0	0	0	0	0	3.57219e-05	0	0	0.000250054	0	0	0	0.000107166	0	0	0	0	0	0	0	7.14439e-05	0.000535829	0	0	0	0	0	0	0	0	0	0	0	0	0	0	0	0.0823391
control5-early disease	0	0	0.00117882	0.0796956	0	0	3.57219e-05	0.000500107	0.000642995	0.000214332	0.000107166	0	0	0	0	3.57219e-05	0.000250054	3.57219e-05	0	0.000785883	0	0	0	0	0.000321497	0	3.57219e-05	0	0	0	3.57219e-05	0.000250054	0.000107166	0	0	0	0	0	3.57219e-05	3.57219e-05	3.57219e-05	7.14439e-05	0	0	0	3.57219e-05	0	3.57219e-05	0.0220047
control5-early post partum	0.00239337	0.00150032	0.188219	7.14439e-05	0.011824	0.00550118	0.00132171	0.000107166	0.000464385	0.00017861	0.0108237	0.00464385	0.00889476	0.00882332	0.000357219	0.00185754	0.0373651	0.0139316	0.00346503	0.00117882	3.57219e-05	0.00185754	0.000678717	0.0029292	0.0541545	0.00150032	0.00157177	0	0.00171465	0.00793027	0.000250054	0.0604058	7.14439e-05	0.00271487	0.00710867	0.0142888	0.0105737	0.000464385	0.000107166	0.140173	0.000571551	0.00017861	0.00157177	0.00421519	0.00103594	0.00132171	0.000857327	0.024791	0.00128599
control5-early pre-onset	0.00103594	0.000321497	0.107594	3.57219e-05	0.00592984	0.00257198	0.000768022	0.000571551	0.00269701	5.35829e-05	0.00566193	0.00207187	0.00430449	0.00469744	0.000142888	0.000910909	0.0160927	0.00651925	0.00141102	0.000857327	1.7861e-05	0.000964492	0.000196471	0.00200043	0.0262735	0.000714439	0.000785883	0.000428663	0.000464385	0.00357219	7.14439e-05	0.0326141	0	0.0197185	0.00355433	0.0061799	0.00564407	0.000214332	0.00017861	0.0646389	0.00112524	0.138047	0.000535829	0.00185754	0.000500107	0.000714439	0.00037508	0.0118597	0.000893049
control5-late pre-onset	0	3.57219e-05	0.00275059	0.271165	3.57219e-05	3.57219e-05	0	0.083125	0.0114667	0.000678717	7.14439e-05	3.57219e-05	3.57219e-05	0.000107166	0	3.57219e-05	0.000285776	3.57219e-05	7.14439e-05	0	3.57219e-05	7.14439e-05	3.57219e-05	0	0.000392941	0	3.57219e-05	0.00150032	0.000107166	0.000107166	0	0.000857327	0.00017861	7.14439e-05	0	0	0	3.57219e-05	0	3.57219e-05	0	7.14439e-05	7.14439e-05	0.000142888	0	0	0	3.57219e-05	0.0504037
control6-early disease	0	0	0.00110738	0.00346503	0	1.7861e-05	0	0.00162535	0	0.0424377	5.35829e-05	0	1.7861e-05	3.57219e-05	0	1.7861e-05	0.000107166	1.7861e-05	1.7861e-05	0.000750161	0.000160749	0	0	0.120829	0.000107166	0	0	0	3.57219e-05	7.14439e-05	0	0.000339358	0.00882332	0	1.7861e-05	1.7861e-05	0	0	0	1.7861e-05	0.0385976	0	1.7861e-05	1.7861e-05	0	0	1.7861e-05	1.7861e-05	0.0485818
control6-early post partum	0.00126813	0.00158963	0.326445	7.14439e-05	0.000982353	0.00871615	0.00294706	0.000107166	0.000482246	0	0.0190755	0.00225048	0.0136458	0.0122169	0.00153604	0.0052154	0.0421519	0.00337572	0.00294706	0.00526899	3.57219e-05	0.00582268	0.00182182	0.00141102	0.0781239	0.00225048	0.00221476	1.7861e-05	0.00237551	0.00935915	0.000714439	0.0863757	1.7861e-05	0.00151818	0.000875188	0.00121455	1.7861e-05	0.000660856	0.000910909	0.00605487	0.00148246	5.35829e-05	0.00150032	0.00832321	0.00137529	0.00153604	0.00157177	0.0061799	0.00133957
control6-early pre-onset	0.0014646	0.00180396	0.304905	0.000267915	0.00103594	0.00735872	0.00235765	8.93049e-05	0.0494213	1.7861e-05	0.0187004	0.00442952	0.0128242	0.0120919	0.00100021	0.00457241	0.0643531	0.00332214	0.00417947	0.00133957	3.57219e-05	0.00485818	0.00150032	0.000482246	0.0664607	0.00257198	0.00200043	0.000946631	0.00266128	0.0100021	0.00126813	0.0761235	3.57219e-05	0.00267915	0.00101808	0.00158963	1.7861e-05	0.00133957	0.000910909	0.00616203	0.000696578	0.000250054	0.00176824	0.00730514	0.00121455	0.000875188	0.00151818	0.00635851	0.00037508
control6-late pre-onset	0	0	0.0015539	0	0	5.35829e-05	1.7861e-05	0.0100557	0.24532	0	7.14439e-05	1.7861e-05	3.57219e-05	0.000107166	3.57219e-05	0	0.000321497	0	0	0.00321497	0	0.000107166	0	0.217243	0.000321497	1.7861e-05	0	0.00298278	0	7.14439e-05	0	0.000571551	0	0	0	0	0	1.7861e-05	1.7861e-05	3.57219e-05	0.492641	0	0	1.7861e-05	1.7861e-05	0	5.35829e-05	8.93049e-05	1.7861e-05
control7-early disease	1.7861e-05	0	0.00151818	0.0101808	0	1.7861e-05	1.7861e-05	0.00196471	0	0.0176109	3.57219e-05	0	3.57219e-05	8.93049e-05	0	3.57219e-05	0.000142888	0	1.7861e-05	0.000125027	0.00055369	0	0	0	0.000321497	1.7861e-05	0	0	0	3.57219e-05	0	0.000392941	0.00282203	1.7861e-05	0	0	0	0	0	7.14439e-05	0.0161999	0	0	0	0	1.7861e-05	0	1.7861e-05	0.0512431
control7-early post partum	0.00158963	0.00151818	0.349789	0.000285776	0.00121455	0.0087876	0.00183968	7.14439e-05	0.0015539	1.7861e-05	0.0235765	0.00223262	0.0133957	0.0128599	0.00116096	0.00560834	0.041491	0.00334	0.00269701	0.00100021	1.7861e-05	0.00598343	0.00126813	0.000428663	0.0847503	0.00233979	0.00223262	0.000285776	0.00246481	0.0107702	0.00128599	0.0903051	1.7861e-05	0.00141102	0.00100021	0.0014646	1.7861e-05	0.000803744	0.000803744	0.00657284	0.00130385	8.93049e-05	0.00221476	0.00891262	0.00121455	0.00166107	0.00151818	0.00632278	0.000607273
control7-early pre-onset	0.0007323	0.000910909	0.169018	1.7861e-05	0.000482246	0.00409016	0.000964492	0.230639	0.254894	0	0.0108416	0.00173251	0.00635851	0.00630492	0.000517968	0.00314353	0.0287383	0.00162535	0.00171465	0.00017861	0.00484032	0.00264342	0.000785883	0.00017861	0.0452061	0.00121455	0.00128599	0.00214332	0.00139316	0.00566193	0.000464385	0.0426877	0	0.00110738	0.000589412	0.000696578	0	0.000446524	0.000678717	0.00262556	0.000678717	3.57219e-05	0.00130385	0.00414375	0.000839466	0.000714439	0.000750161	0.00326856	0.000392941
control7-late pre-onset	0	1.7861e-05	0.00444738	0.105344	0	7.14439e-05	7.14439e-05	0.0944309	0.329463	0.000160749	0.000142888	7.14439e-05	0.000125027	8.93049e-05	0	3.57219e-05	0.000642995	1.7861e-05	1.7861e-05	0	0.0617811	3.57219e-05	3.57219e-05	0	0.00101808	1.7861e-05	3.57219e-05	0.00121455	0	0.000250054	1.7861e-05	0.000893049	0.000107166	0	0	5.35829e-05	0	1.7861e-05	0	0.000125027	0.00216118	5.35829e-05	1.7861e-05	8.93049e-05	1.7861e-05	1.7861e-05	5.35829e-05	0.000125027	0.0379188
control8-early disease	3.57219e-05	0	0.000321497	0	0	0	0	0.000571551	0	0.049332	3.57219e-05	0	0	3.57219e-05	3.57219e-05	0	0	0	0	0.0160034	0	0	0	0	0	0	0	0	0	0	0	0.00017861	0.0104665	0	0	0	0	0	0	0	7.14439e-05	0	0	0	0	7.14439e-05	0	0	0.0466171
control8-early post partum	0.00350075	0.00335786	0.31396	7.14439e-05	0	0.00925198	0.00250054	7.14439e-05	0.000214332	0	0.0384725	0	0.0235408	0.00953776	0.00503679	0.00900193	0.00257198	0	0.00214332	0.000678717	0	0.00778738	0.00592984	0.000142888	0.0599414	0.00450096	0.00310781	3.57219e-05	0.00657284	0.0026077	7.14439e-05	0.0457955	0.000142888	0.00328642	0.000321497	0	0	0.00385797	0.00339358	0.000321497	0.000678717	0.000285776	0.00253626	0.011431	0.00657284	0.00525113	0.00496535	0.000357219	0.000571551
control8-early pre-onset	0.00635851	0.00289348	0.32732	3.57219e-05	0	0.0078231	0.00235765	0	0.000107166	3.57219e-05	0.0351861	0	0.0257912	0.0112881	0.00532257	0.00818032	0.00221476	0	0.0017861	0.000285776	0	0.0058584	0.00746589	0	0.0325784	0.00328642	0.0061799	0	0.00821605	0.00185754	3.57219e-05	0.0494034	0.000250054	0.00403658	0	0	0	0.0043938	0.00307209	0.000285776	0.000428663	3.57219e-05	0.00339358	0.0103951	0.0096092	0.00478674	0.00546546	0.000428663	0.000500107
control8-late pre-onset	0	0	0.000428663	0	0	0	0	0.00135743	0	0.0234693	0	0	0	0	0	0	0	0	0	0	0	0	0	0	0	0	0	0	0	0	0	7.14439e-05	0.00596556	0	0	0	0	0	0	0	3.57219e-05	0	0	7.14439e-05	0	0	0	0	0.0546903
control9-early disease	0	0	0.000285776	0	0	0	0	0.00150032	7.14439e-05	7.14439e-05	0	0	0	0	0	0	0	0	0	0.00092877	0.000107166	3.57219e-05	0	3.57219e-05	3.57219e-05	0	0	0	0	0.000464385	0	7.14439e-05	0.0327213	0.000678717	0	0	0	0	0	0	0.0528327	3.57219e-05	0	0	3.57219e-05	0	0	0	0.000678717
control9-early post partum	0.000714439	0.000285776	0.0375438	0	0	0.000607273	0.000392941	0.000142888	0.00017861	0	0.0084661	0	0.0040723	0.000893049	0.000571551	0.000142888	0.000428663	0	7.14439e-05	0.865686	0	0.000785883	0.000714439	7.14439e-05	0.00321497	0.000678717	0.000142888	0	0.00125027	0.000142888	0	0.00535829	0.000107166	0.000357219	3.57219e-05	0	0	0.0011431	0.000392941	3.57219e-05	0.00117882	0	0.000535829	0.000785883	0.000964492	7.14439e-05	0.000285776	0	3.57219e-05
control9-early pre-onset	0.000107166	3.57219e-05	0.00989498	0	0	0.000321497	0	0.000142888	0.0768736	0	0.00142888	0	0.00100021	0.000142888	0.000107166	7.14439e-05	0.000107166	0	3.57219e-05	0.867757	0	0.000107166	0.000250054	3.57219e-05	0.000857327	0.00017861	7.14439e-05	0.0227906	0.000321497	0.000107166	0	0.00107166	0	0.000142888	0	0	0	0.00017861	7.14439e-05	0	0.00139316	0.000285776	3.57219e-05	0.00017861	0.00017861	3.57219e-05	0.00017861	0	3.57219e-05
control9-late pre-onset	0.00278631	0.00214332	0.225691	3.57219e-05	0	0.00353647	0.00167893	0.272666	0.000893049	0.000357219	0.030578	0.000107166	0.0167536	0.00503679	0.00285776	0.00160749	0.00153604	0	0.00132171	0.000464385	0.000285776	0.00428663	0.0040723	0.00392941	0.028899	0.00239337	0.00164321	0.000357219	0.00528685	0.00367936	0.00017861	0.0336143	0.000142888	0.00164321	7.14439e-05	3.57219e-05	0	0.00496535	0.00217904	0.000285776	0.00132171	0.00242909	0.00232193	0.00671572	0.00360792	0.000821605	0.00289348	0	0.000964492
LOS1-early disease	1.19073e-05	0	0.000642995	0	4.76293e-05	0	0	0.331226	0.0111214	1.19073e-05	2.38146e-05	0	1.19073e-05	2.38146e-05	1.19073e-05	0	0.000107166	4.76293e-05	1.19073e-05	0	0	0	0	0	0.000166702	0	0	0.000321497	0	2.38146e-05	1.19073e-05	0.000142888	0.000226239	0	0	9.52585e-05	2.38146e-05	0	0	0.000381034	0	5.95366e-05	0	0	0	0	0	0.000142888	0.0623586
LOS1-early post partum	0.000571551	0.000857327	0.179021	0.00135743	0.00998428	0.00464385	0.00101808	0.011306	0.00278631	3.57219e-05	0.0103594	0	0.00798385	0.00862685	0.000267915	0.00133957	0.0312031	0.0127349	0.00258984	0.000982353	0.00130385	0.00162535	0.000571551	3.57219e-05	0.0494034	0.00150032	0.000964492	0.000285776	0.000857327	0.00682289	0.00246481	0.0549225	0.000142888	0.000875188	0.00755519	0.0132528	0.0105201	0.000232193	0.00017861	0.117168	0.019915	0.000464385	0.00137529	0.00273273	0.000339358	0.000714439	0.00055369	0.0234515	0.0144138
LOS1-early pre-onset	0.000785883	0.000857327	0.19522	0	0.0119669	0.00514396	0.00153604	0.00017861	0.00525113	0	0.0123955	3.57219e-05	0.0109309	0.0070015	0.000357219	0.00132171	0.038794	0.0142888	0.00296492	0.000785883	0	0.00192898	0.00100021	0	0.0489391	0.00160749	0.00121455	0.000142888	0.0011431	0.00628706	0.00189326	0.0602986	0.000142888	0.0011431	0.00907337	0.0156105	0.012074	0.000357219	0.000250054	0.148996	0.000750161	0.000392941	0.0014646	0.00382225	0.000428663	0.000428663	0.00110738	0.0293277	0.000785883
LOS1-late pre-onset	5.35829e-05	5.35829e-05	0.0130206	3.57219e-05	5.35829e-05	0.000125027	0.000107166	0.0572087	0.340984	0	0.000625134	0.000232193	0.000339358	0.000357219	7.14439e-05	0.000392941	0.00142888	7.14439e-05	7.14439e-05	0	0	0.000125027	1.7861e-05	0	0.00276845	1.7861e-05	5.35829e-05	0.0605308	0.000107166	0.000303636	3.57219e-05	0.00266128	0.000107166	0.000428663	1.7861e-05	7.14439e-05	0	5.35829e-05	7.14439e-05	0.000196471	3.57219e-05	0	7.14439e-05	0.00037508	8.93049e-05	3.57219e-05	3.57219e-05	0.00017861	0.047528
LOS2-early disease	1.19073e-05	2.38146e-05	0.00396514	0.000607273	0.000250054	7.14439e-05	1.19073e-05	0.00285776	0	0.000202424	0.00017861	8.33512e-05	0.00013098	0.000250054	0	4.76293e-05	0.000809697	0.000261961	3.57219e-05	0.00133362	1.19073e-05	2.38146e-05	0	0.00136934	0.00127408	2.38146e-05	3.57219e-05	0	9.52585e-05	0.000250054	2.38146e-05	0.00125027	0.00030959	7.14439e-05	0.000250054	0.000321497	0.000285776	0	0	0.00294111	0.000702531	4.76293e-05	3.57219e-05	0.000166702	0	0	1.19073e-05	0.000559644	0.0957943
LOS2-early post partum	0.0026077	0.00121455	0.164857	0	0.0132528	0.00489391	0.000535829	0.000571551	0.00257198	0	0.0112881	0.00132171	0.0113239	0.00793027	7.14439e-05	0.00100021	0.0334357	0.0108595	0.00264342	3.57219e-05	3.57219e-05	0.0014646	0.000500107	0.000142888	0.0344717	0.00164321	0.00121455	0.000250054	0.000893049	0.0980567	7.14439e-05	0.0490105	0.000285776	0.00117882	0.00682289	0.0145388	0.0132528	0.000535829	0.000535829	0.130171	0.000464385	0.000107166	0.00142888	0.00278631	0.000857327	0.00103594	0.00153604	0.0252197	0.0026077
LOS2-early pre-onset	0.00253626	0.00171465	0.204544	0.000107166	0.0110381	0.00600129	0.000821605	7.14439e-05	0.00200043	0.000107166	0.0125384	0.00092877	0.0125027	0.00871615	0.00017861	0.00128599	0.0138958	0.0133243	0.00117882	0.000357219	0	0.00164321	0.000642995	0.000714439	0.0453311	0.00235765	0.00100021	0.000250054	0.00132171	0.0110024	0.00121455	0.0625491	0.000214332	0.000857327	0.00725155	0.0146817	0.0108952	0.000285776	0.000285776	0.138315	0.00539401	3.57219e-05	0.00150032	0.00460813	0.000785883	0.00092877	0.000893049	0.0259699	0.00267915
LOS2-late pre-onset	0	0	0.000142888	0	0	0	0	0	3.57219e-05	0.000107166	0	0	0	0	0	0	0	0	0	0.000214332	0	0	0	0	0	0	0	0	0	0	0	3.57219e-05	0.00017861	0	0	0	0	0	0	3.57219e-05	0.0084661	0	0	0	0	0	0	0	0.0934486
LOS3-early disease	0	0	0.000285776	0	0	3.57219e-05	0	0.000107166	0.00182182	0.0167893	1.7861e-05	0	0	3.57219e-05	0	0	1.7861e-05	3.57219e-05	0	0.0123062	0	0	0	0	3.57219e-05	0	0	0.000303636	0	5.35829e-05	0	8.93049e-05	0.00269701	0.000232193	1.7861e-05	1.7861e-05	1.7861e-05	0	0	0.000321497	0.000107166	0	0	0	0	1.7861e-05	0	8.93049e-05	0.121187
LOS3-early post partum	0.00101808	0.000410802	0.0866793	1.7861e-05	0.00587626	0.00232193	0.000196471	0.000714439	0.000267915	0.000946631	0.00541187	0.00137529	0.00373294	0.0036615	8.93049e-05	0.000642995	0.0164678	0.00623348	0.000660856	0.0775523	0.000142888	0.00101808	0.000232193	0	0.0237015	0.000696578	0.000660856	1.7861e-05	0.000410802	0.00660856	0.000125027	0.0279524	0.000214332	0.000750161	0.00339358	0.00485818	0.00437594	0.000125027	3.57219e-05	0.0579588	0.419233	0.000107166	0.000821605	0.00128599	0.000428663	0.000303636	0.000339358	0.0137708	0.00278631
LOS3-early pre-onset	0.000660856	0.000303636	0.06012	0.000250054	0.00453669	0.00191112	0.000303636	0.00017861	0.000821605	1.7861e-05	0.00369722	0.000660856	0.00414375	0.00266128	0.000160749	0.000321497	0.0127527	0.00451883	0.000750161	0.304976	7.14439e-05	0.00055369	0.000339358	0.000196471	0.0166107	0.000535829	0.000464385	3.57219e-05	0.00055369	0.00298278	7.14439e-05	0.0187897	3.57219e-05	0.000446524	0.00267915	0.0054476	0.00378653	0.00037508	3.57219e-05	0.0440094	0.343663	8.93049e-05	0.000410802	0.00121455	0.000267915	0.000410802	0.000357219	0.00809102	0.00391155
LOS3-late pre-onset	0	1.7861e-05	0.00132171	0	0	1.7861e-05	0	0.00385797	0.00130385	0.0325427	1.7861e-05	1.7861e-05	3.57219e-05	3.57219e-05	0	0	7.14439e-05	3.57219e-05	0	0.00291134	0.00017861	0	0	0	0.00037508	5.35829e-05	0	0	0	0.00226834	0	0.000285776	0.0076445	0.000125027	7.14439e-05	8.93049e-05	7.14439e-05	0	0	0.000714439	0.00576909	0	0	1.7861e-05	0	0	3.57219e-05	0.00017861	0.0461349
NEC1-early disease	2.38146e-05	3.57219e-05	0.004239	0	4.76293e-05	9.52585e-05	3.57219e-05	0.0990569	8.33512e-05	0	0.000750161	0	0.000392941	0.000154795	1.19073e-05	3.57219e-05	0.000119073	3.57219e-05	1.19073e-05	0.567896	0	8.33512e-05	0.00013098	4.76293e-05	0.000964492	0.000119073	2.38146e-05	3.57219e-05	9.52585e-05	7.14439e-05	0	0.000821605	0.00017861	2.38146e-05	3.57219e-05	3.57219e-05	0.00013098	0.000154795	5.95366e-05	0.000440571	0.000440571	1.19073e-05	7.14439e-05	0.000190517	0.000142888	5.95366e-05	4.76293e-05	0.000357219	0.0283751
NEC1-early post partum	0.00460813	0.00296492	0.292277	0	0.000142888	0.00628706	0.00296492	0.00017861	0.000107166	3.57219e-05	0.0377581	0	0.0231835	0.00971637	0.00371508	0.00421519	0.00321497	3.57219e-05	0.00314353	0.000321497	0	0.00603701	0.00578695	0.000500107	0.0813746	0.00285776	0.00200043	0	0.007323	0.00196471	7.14439e-05	0.0473673	7.14439e-05	0.00489391	3.57219e-05	0.00017861	0	0.0084661	0.00382225	0.000285776	0.000642995	0.00017861	0.0017861	0.00996642	0.00753733	0.00382225	0.0037508	0.000214332	0.000500107
NEC1-early pre-onset	0	0	0.000214332	0	0	0	0	0.00693006	0	0	3.57219e-05	0	0	0	0	0	0	0	0	0.0283275	0	0	0	7.14439e-05	0.000107166	0	0	0	3.57219e-05	0	0	3.57219e-05	0.000321497	0	0	0	0	0	0	0	0.000107166	0	0	0	0	0	0	0	0.0796956
NEC1-late pre-onset	0	0	3.57219e-05	0	0	0	0	0.00264342	0.000857327	0	0	0	0	0	0	0	0	0	0	0.0335072	0	0	0	0	0	0	0	3.57219e-05	0	0	0	0	0.000357219	0	0	0	0	0	0	0	3.57219e-05	0	0	0	0	0	0	0	0.0907337
NEC2-early disease	7.14439e-05	0	0.00314353	3.57219e-05	0.000142888	7.14439e-05	3.57219e-05	0.973673	7.14439e-05	0	0.000250054	0	0.000357219	3.57219e-05	0	7.14439e-05	0.000321497	7.14439e-05	7.14439e-05	0	0	7.14439e-05	3.57219e-05	0	0.000571551	0	0	0	3.57219e-05	7.14439e-05	3.57219e-05	0.000857327	3.57219e-05	0	0.00017861	0.000392941	0.000285776	0	0	0.00285776	0	0	7.14439e-05	3.57219e-05	0	0	3.57219e-05	0.000535829	3.57219e-05
NEC2-early post partum	0.00092877	0.00125027	0.191541	7.14439e-05	0.00889476	0.0043938	0.00107166	0.000535829	0.000392941	3.57219e-05	0.0102522	7.14439e-05	0.00853754	0.00803744	0.000321497	0.00132171	0.0368293	0.0116454	0.00221476	0.00778738	0	0.00196471	0.000714439	0.000321497	0.0390441	0.000893049	0.0022862	0	0.00125027	0.00614417	0.000642995	0.0586197	3.57219e-05	0.00103594	0.00707294	0.0107523	0.00835893	0.000392941	0.000142888	0.109702	0.000357219	0.000357219	0.00196471	0.00285776	0.000321497	0.00135743	0.000642995	0.031471	0.00989498
NEC2-early pre-onset	0.00115501	0.0011431	0.248315	7.14439e-05	0.00848991	0.00639423	0.00171465	0.000107166	0.00092877	1.19073e-05	0.0147055	0.00172656	0.0133481	0.00860899	0.000833512	0.00332214	0.0360315	0.00952585	0.00275059	0.000869234	1.19073e-05	0.00315544	0.000869234	0.000107166	0.061918	0.00216713	0.00155986	5.95366e-05	0.00180991	0.00685861	0.00209569	0.060763	0.000523922	0.00135743	0.00604892	0.00893049	0.00858517	0.000440571	0.00079779	0.0898407	0.00136934	0.000250054	0.0017861	0.00408421	0.000702531	0.0013098	0.00126218	0.0190517	0.000452478
NEC2-late pre-onset	0.00092877	0.000464385	0.0889476	1.7861e-05	0.00657284	0.00233979	0.000267915	0.486444	0.000678717	3.57219e-05	0.00467957	0.000107166	0.00662642	0.00491177	0.000142888	0.000517968	0.015164	0.00757305	0.00112524	0.000857327	5.35829e-05	0.000660856	0.000714439	0.000232193	0.0225048	0.0010538	0.000517968	8.93049e-05	0.000875188	0.00339358	0.00264342	0.0289705	0.00128599	0.000642995	0.00337572	0.00798385	0.00893049	0.000321497	0.000232193	0.0703722	0.000196471	0.00037508	0.000607273	0.00198257	0.000250054	0.000446524	0.000660856	0.0119847	0.00244695
NEC3-early disease	1.7861e-05	0	0.000464385	1.7861e-05	7.14439e-05	1.7861e-05	0	0.0202543	0.458598	0.0482068	0	0	0	0	0	0	0	1.7861e-05	0	1.7861e-05	0.00139316	0	0	0	7.14439e-05	0	0	0.016057	0	5.35829e-05	1.7861e-05	0.000107166	0.0129492	1.7861e-05	1.7861e-05	1.7861e-05	3.57219e-05	0	1.7861e-05	0.000285776	1.7861e-05	1.7861e-05	0	1.7861e-05	0	0	0	0.000142888	0.0268986
NEC3-early post partum	0.000571551	0.00139316	0.172144	0.000142888	0.00882332	0.00485818	0.000785883	0.00414375	0.00092877	0.000142888	0.0112881	0	0.0099307	0.00689433	0.000285776	0.00132171	0.0354719	0.0135386	0.00235765	0.0092877	0	0.00107166	0.000714439	0	0.0448668	0.00164321	0.00132171	7.14439e-05	0.00142888	0.00668	0.00214332	0.055119	0.000321497	0.000857327	0.00703722	0.0132886	0.0108237	0.000535829	0.000214332	0.11306	0.000285776	0.000642995	0.00167893	0.00307209	0.000821605	0.000821605	0.000678717	0.0234693	0.0118954
NEC3-early pre-onset	0.000535829	0.000500107	0.0999143	7.14439e-05	0.00743016	0.00337572	0.00037508	0.000107166	0.395638	0	0.00762663	0	0.00716225	0.00467957	0.000160749	0.000678717	0.00980567	0.00726941	0.000964492	0.000464385	0	0.00092877	0.000517968	1.7861e-05	0.0220226	0.000982353	0.000750161	0.0763021	0.000910909	0.00307209	0.00151818	0.0320247	0.000160749	0.000482246	0.00373294	0.00701936	0.00791241	0.000125027	0.000107166	0.0744802	0.000303636	0.000125027	0.000946631	0.00223262	0.000410802	0.000446524	0.000642995	0.0138244	0.00182182
NEC3-late pre-onset	1.19073e-05	2.38146e-05	0.00609654	1.19073e-05	0.000500107	7.14439e-05	2.38146e-05	0.000714439	0.521147	0.0321378	0.000261961	0	0.000250054	0.000190517	3.57219e-05	5.95366e-05	0.000809697	0.00061918	4.76293e-05	0	3.57219e-05	8.33512e-05	2.38146e-05	0	0.00148841	3.57219e-05	3.57219e-05	0.106178	2.38146e-05	0.000142888	0.00013098	0.00207187	0.00868043	5.95366e-05	0.000190517	0.000535829	0.000428663	0	0	0.00495344	0.000261961	2.38146e-05	2.38146e-05	0.000107166	1.19073e-05	2.38146e-05	7.14439e-05	0.0009764	0.0179443
NEC4-early disease	0	0	3.57219e-05	0.000500107	0	0	0	0.00017861	0.000357219	0.0184325	0	0	0	0	0	0	0	3.57219e-05	0	0.00860899	0.000142888	0	0	0.0122169	0	0	0	0	0	0	0	0	0.00621562	0	0	0	0	0	0	3.57219e-05	0.0129313	0	0	0	0	0	0	0	0.0880903
NEC4-early post partum	0.00246481	0.00110738	0.196756	7.14439e-05	0.0104665	0.00417947	0.00196471	7.14439e-05	0.000857327	0.00132171	0.0112524	0.00196471	0.00914482	0.00703722	0.000357219	0.00203615	0.0200757	0.0135386	0.00160749	0.00117882	0.000107166	0.00200043	0.000785883	0.00282203	0.0511895	0.00135743	0.00160749	0.000142888	0.00128599	0.0084661	0.000535829	0.062692	0.000428663	0.0011431	0.007323	0.0143245	0.0112524	0.000142888	0.000250054	0.132243	0.000607273	7.14439e-05	0.00221476	0.00400086	0.00117882	0.000750161	0.000571551	0.0268629	0.00160749
NEC4-early pre-onset	0	0	0.0011431	0	1.7861e-05	3.57219e-05	0	0	1.7861e-05	0.0199686	3.57219e-05	1.7861e-05	3.57219e-05	3.57219e-05	0	0	0.000160749	0	1.7861e-05	0.000142888	0	0	0	0.145067	0.000410802	3.57219e-05	0	0	1.7861e-05	7.14439e-05	1.7861e-05	0.000267915	0.00446524	1.7861e-05	0	0	0	0	0	5.35829e-05	5.35829e-05	0	0	0	1.7861e-05	0	0	1.7861e-05	0.0492784
NEC4-late pre-onset	0	0	0.000750161	0.000250054	0	3.57219e-05	0	0.00460813	0.000321497	0.0922698	0.000107166	3.57219e-05	7.14439e-05	0.000107166	0	0	7.14439e-05	0	0	0.0226477	0.000107166	3.57219e-05	0	0.00185754	0.00017861	0	0	0	0	0.000107166	0	0.00017861	0.0181825	0	0	0	0	0	0	7.14439e-05	7.14439e-05	0	0	0	0	0	3.57219e-05	0	0.0157534
[truncated: 24 more columns]

## Sheet: CTLvsLOSvsNEC
	ZIBR model				LME model
	p_Time	p_Treat	FDR adjusted p_Treat		p_Time	p_Treat	FDR adjusted p_Treat
OTU317	6.18394e-14	0.52377	0.996016		1.94494e-15	0.547931	0.744931
OTU57	0	0.952387	0.996016		6.14894e-17	0.69906	0.810022
OTU30	7.77156e-16	0.86779	0.996016		2.16304e-19	0.764349	0.832799
OTU738	0.101021	0.281609	0.913285		0.0612665	0.316372	0.72597
OTU736	2.51257e-09	0.00855421	0.16363		7.6123e-10	0.0160881	0.219714
OTU128	0	0.505243	0.996016		1.94299e-19	0.69413	0.810022
OTU322	1.11022e-16	0.965022	0.996016		3.21592e-17	0.604805	0.752051
OTU25	0.347104	0.797945	0.996016		0.134941	0.312823	0.72597
OTU861	0.000979922	0.568402	0.996016		0.817451	0.557255	0.744931
OTU1243	0.090445	0.455089	0.996016		6.88092e-05	0.237511	0.72597
OTU1026	2.22045e-16	0.460237	0.996016		1.82466e-17	0.5507	0.744931
OTU1111	3.82473e-09	0.0906023	0.472426		2.46517e-08	0.456473	0.72597
OTU46	0	0.875381	0.996016		4.84085e-18	0.959786	0.969941
OTU729	0	0.993484	0.996016		1.77303e-19	0.923159	0.949164
OTU384	3.54161e-14	0.429962	0.996016		5.5862e-12	0.161971	0.72597
OTU1028	2.66454e-15	0.815823	0.996016		1.58593e-16	0.293864	0.72597
OTU234	9.58981e-11	0.433596	0.996016		7.47743e-14	0.395985	0.72597
OTU730	2.50652e-08	0.0436767	0.31884		1.57014e-10	0.0277094	0.224754
OTU85	0	0.415768	0.996016		2.34642e-19	0.458398	0.72597
OTU48	0.011899	0.809326	0.996016		0.707019	0.969941	0.969941
OTU19	0.28464	0.231264	0.88854		0.292525	0.10302	0.626708
OTU1041	0	0.673042	0.996016		3.75545e-17	0.274391	0.72597
OTU525	8.88178e-16	0.391883	0.996016		2.45621e-13	0.392943	0.72597
OTU718	2.91073e-05	0.500243	0.996016		0.00144192	0.292996	0.72597
OTU1069	6.10623e-15	0.801051	0.996016		4.55687e-18	0.445665	0.72597
OTU870	0	0.756978	0.996016		3.59157e-18	0.913881	0.949164
OTU288	2.22045e-16	0.865609	0.996016		2.59856e-16	0.519948	0.744239
OTU444	0.00699953	0.713204	0.996016		0.553179	0.261474	0.72597
OTU84	3.21965e-15	0.0759825	0.426671		2.91051e-15	0.407821	0.72597
OTU714	0.000373933	0.971401	0.996016		0.112642	0.487295	0.72597
OTU108	7.56962e-11	0.0568481	0.345826		1.44719e-10	0.045774	0.33415
OTU325	1.11022e-15	0.177634	0.810454		3.3306e-20	0.563959	0.744931
OTU51	0.00591804	0.0152779	0.163843		1.52698e-06	0.31392	0.72597
OTU1105	2.84147e-08	0.653277	0.996016		0.827823	0.458972	0.72597
OTU734	4.21413e-11	0.00492035	0.16363		3.06024e-11	0.0180587	0.219714
OTU728	2.6421e-08	0.0177001	0.163843		7.99545e-10	0.0169573	0.219714
OTU731	9.44443e-08	0.00221044	0.161362		1.11552e-07	0.0138433	0.219714
OTU78	1.11022e-16	0.656577	0.996016		2.08966e-11	0.437416	0.72597
OTU228	1.93179e-14	0.271578	0.913285		2.58222e-12	0.22123	0.72597
OTU401	1.3967e-07	0.00896605	0.16363		1.82113e-09	0.0151733	0.219714
OTU724	0.147413	0.573688	0.996016		0.451153	0.302154	0.72597
OTU1184	1.0352e-05	0.7628	0.996016		0.0567629	0.441353	0.72597
OTU1113	0	0.655131	0.996016		4.11081e-18	0.737249	0.815442
OTU125	2.22045e-16	0.967243	0.996016		2.22957e-17	0.462863	0.72597
OTU1021	3.33067e-16	0.730449	0.996016		2.50216e-13	0.294633	0.72597
OTU274	1.11022e-16	0.911514	0.996016		1.47854e-15	0.732963	0.815442
OTU802	2.33147e-15	0.505126	0.996016		5.46198e-15	0.485248	0.72597
OTU752	2.13525e-08	0.0561601	0.345826		5.03967e-12	0.0213799	0.222962
OTU862	1.93191e-05	0.27059	0.913285		1.79196e-08	0.292171	0.72597
OTU533	2.02061e-14	0.1994	0.856245		1.76318e-15	0.421899	0.72597
OTU789	0.0920205	0.229916	0.88854		0.00209123	0.665724	0.809965
OTU743	9.08361e-09	0.0201998	0.163843		6.91115e-12	0.0250623	0.224754
OTU86	3.70814e-14	0.624135	0.996016		4.824e-16	0.376432	0.72597
OTU692	0.00973338	0.320282	0.974192		0.792806	0.337588	0.72597
OTU885	0	0.848656	0.996016		7.12524e-21	0.714025	0.814435
OTU122	1.83022e-11	0.287747	0.913285		7.27072e-15	0.345338	0.72597
OTU698	1.25023e-06	0.16509	0.803436		0.130852	0.361903	0.72597
OTU34	1.05471e-14	0.409916	0.996016		2.96817e-15	0.357401	0.72597
OTU769	0.0112057	0.895162	0.996016		0.139884	0.468644	0.72597
OTU89	2.84939e-05	0.0200246	0.163843		3.0524e-09	0.0139675	0.219714
OTU889	0	0.837913	0.996016		8.5237e-19	0.910509	0.949164
OTU261	1.11022e-15	0.996016	0.996016		2.05333e-16	0.596867	0.752051
OTU29	7.93946e-05	0.773042	0.996016		9.58093e-09	0.607822	0.752051
OTU82	0	0.594854	0.996016		4.288e-18	0.50369	0.735388
OTU774	3.21744e-08	0.0191261	0.163843		3.33074e-07	0.0535617	0.355455
OTU37	4.33764e-13	0.61273	0.996016		5.18675e-13	0.202513	0.72597
OTU999	0	0.969132	0.996016		1.4001e-20	0.681141	0.810022
OTU810	0	0.919402	0.996016		1.36186e-19	0.807048	0.866389
OTU707	0.0380984	0.90252	0.996016		0.063312	0.347785	0.72597
OTU1001	1.11022e-16	0.498252	0.996016		1.97747e-17	0.571454	0.744931
OTU795	3.33067e-16	0.371144	0.996016		3.29598e-15	0.451424	0.72597
OTU427	1.63203e-14	0.844657	0.996016		5.72371e-17	0.403967	0.72597
OTU869	0.47427	0.548024	0.996016		0.146028	0.47007	0.72597

## Sheet: filtered_matrix1_CTLvsLOS
	OTU317	OTU57	OTU30	OTU738	OTU736	OTU128	OTU322	OTU25	OTU861	OTU1243	OTU1026	OTU1111	OTU46	OTU729	OTU384	OTU1028	OTU234	OTU730	OTU85	OTU48	OTU19	OTU1041	OTU525	OTU718	OTU1069	OTU870	OTU288	OTU444	OTU84	OTU714	OTU325	OTU51	OTU1105	OTU734	OTU728	OTU731	OTU78	OTU228	OTU401	OTU724	OTU1184	OTU1113	OTU125	OTU1021	OTU274	OTU802	OTU752	OTU862	OTU533
control1-early disease	0	0	0.000321497	0	0	0	0	0.00339358	7.14439e-05	7.14439e-05	0	0	0	3.57219e-05	0	0	7.14439e-05	3.57219e-05	0	0	3.57219e-05	0	0	0	7.14439e-05	0	3.57219e-05	0	0	3.57219e-05	0.000107166	0.000321497	0	0	3.57219e-05	0	0	0	0.000107166	3.57219e-05	0	3.57219e-05	3.57219e-05	0	0	0	7.14439e-05	0.0980567	0
control1-early post partum	0.00150032	0.00101808	0.177717	0.000321497	0.0107702	0.00428663	0.0007323	0.000446524	0.00142888	0.00101808	0.0091984	0.00182182	0.00955562	0.00810888	0.00017861	0.00126813	0.0229692	0.0116811	0.00196471	0.00275059	0.000142888	0.00169679	0.000607273	0.0032507	0.042777	0.00142888	0.0014646	0.000142888	0.000964492	0.00728728	0.055119	0.000357219	0.00117882	0.00721583	0.0127885	0.0109488	0.000107166	0.000267915	0.125848	0.00232193	7.14439e-05	0.00151818	0.00262556	0.000250054	0.0007323	0.000839466	0.0241123	0.00834107	0.00182182
control1-early pre-onset	0.000714439	0.000517968	0.0890369	0.000125027	0.00605487	0.00189326	0.00055369	0.000267915	0.494892	3.57219e-05	0.00539401	0.00196471	0.00532257	0.0036615	0.000214332	0.00055369	0.015164	0.00685861	0.00116096	0.000982353	5.35829e-05	0.00100021	0.000232193	0.000678717	0.0221655	0.000768022	0.000625134	0.00275059	0.000642995	0.00434022	0.0271487	5.35829e-05	0.000946631	0.00380439	0.00650139	0.00739444	8.93049e-05	0.000160749	0.0688183	0.00148246	8.93049e-05	0.000607273	0.00151818	0.000428663	0.000392941	0.000482246	0.011181	0.00175038	0.000750161
control1-late pre-onset	0	0	5.35829e-05	0	0	0	0	7.14439e-05	0.366739	0	0	0	0	1.7861e-05	0	0	1.7861e-05	0	0	7.14439e-05	0	0	1.7861e-05	0	0	0	0	0.0139851	0	0	1.7861e-05	0.000214332	0	0	0	0	0	0	5.35829e-05	1.7861e-05	1.7861e-05	0	0	0	0	0	7.14439e-05	0.0568157	0
control10-early disease	0	0	0.000714439	0	0	0	0	0.000321497	3.57219e-05	3.57219e-05	0	0	0	3.57219e-05	0	0	0	0	0	0.00307209	0.0022862	0	0	0.193899	0.000285776	0	0	0	0	0.115203	0.00017861	0.00328642	0.000250054	0	0	0	0	0	0	0.00864471	0	0	3.57219e-05	0	0	0	0	0.0114667	0
control10-early post partum	0.00139316	0.00125027	0.143638	0	0	0.00357219	0.000857327	3.57219e-05	3.57219e-05	0	0.0163964	0	0.0102879	0.00367936	0.00157177	0.00350075	0.000392941	0	0.000571551	0.0132886	0	0.00278631	0.00282203	0.000107166	0.0150032	0.00153604	0.00117882	0	0.00271487	0.00100021	0.0186111	0.000107166	0.00103594	3.57219e-05	0	0	0.0011431	0.00121455	0.00017861	0.582303	0	0.00092877	0.00425091	0.00242909	0.00128599	0.00189326	0.000107166	3.57219e-05	0.00378653
control10-early pre-onset	0	7.14439e-05	0.00250054	0	0	3.57219e-05	0	0.210188	0.00185754	0	0.000500107	0	0.000357219	0.000142888	7.14439e-05	3.57219e-05	3.57219e-05	0	0	0.0183968	0.0125384	3.57219e-05	0	3.57219e-05	0.000285776	3.57219e-05	0	0.000714439	0.000142888	7.14439e-05	0.000607273	0	3.57219e-05	0	0	0	3.57219e-05	3.57219e-05	0	0.730192	0.000142888	7.14439e-05	7.14439e-05	3.57219e-05	0	0	0	7.14439e-05	3.57219e-05
control10-late pre-onset	0	0	0.000642995	0	0	0	0	0.00132171	0.00017861	0	3.57219e-05	0	0	3.57219e-05	3.57219e-05	0	0	0	0	0.00778738	0.00200043	3.57219e-05	0	0.260056	3.57219e-05	0	0	0.000142888	0	0.0705151	7.14439e-05	0.00771594	0.00492963	0	0	0	0	0	0	0.349718	3.57219e-05	0	0	0	0	0	0	0.00150032	0
control11-early disease	0.000107166	0	0.000321497	0	0	0	0	0.00250054	0	7.14439e-05	3.57219e-05	0	3.57219e-05	0	0	0	0	0	0	0.0120026	0.000750161	0	0	0.000321497	0	0	0	0	0	0	7.14439e-05	0.00342931	0	0	0	0	0	0	0	0.0312567	0	3.57219e-05	3.57219e-05	0	0	0	0	0.0362578	0
control11-early post partum	0.00378653	0.00267915	0.259699	0	0	0.00539401	0.00128599	0.240659	0.00017861	0	0.0344717	0	0.017861	0.00653712	0.00300064	0.00364364	0.000642995	0	0.000500107	0.000392941	0	0.00482246	0.00335786	3.57219e-05	0.0286847	0.00289348	0.0014646	0	0.00592984	0.0011431	0.0377938	0.000142888	0.000857327	3.57219e-05	7.14439e-05	0	0.00117882	0.00221476	0.000285776	0.000607273	0	0.00217904	0.0078231	0.00389369	0.00214332	0.00335786	3.57219e-05	3.57219e-05	0.00646567
control11-early pre-onset	0	3.57219e-05	0.00103594	0	0	3.57219e-05	0	0.0422948	0	7.14439e-05	0.000107166	0	0	0	3.57219e-05	3.57219e-05	0	0	0	0.0047153	0	3.57219e-05	0	3.57219e-05	0.000107166	0	0	0	0	3.57219e-05	0.000142888	0.000642995	0	0	0	0	0	0	0	7.14439e-05	0	0	0	3.57219e-05	0	3.57219e-05	0	0.0735158	0
control11-late pre-onset	0	0	0.000214332	0	0	0	3.57219e-05	0.000250054	0	0.000107166	0	3.57219e-05	0	0	0	0	0	0	0	0.0356505	0	3.57219e-05	0	3.57219e-05	0	0	0	0	0	0	3.57219e-05	0.000750161	0.000107166	0	0	0	0	0	0	0.000214332	0	0	0	0	0	0	0	0.0808745	0
control12-early disease	0	3.57219e-05	0.000750161	0.000107166	0	3.57219e-05	0	0.0129671	0	0	0	0	3.57219e-05	0	0	3.57219e-05	0.000214332	0	0	0.00507252	0.00657284	0	0	0.0729085	0.00017861	0	3.57219e-05	0	0	0.000321497	0.000250054	0.000142888	0	0	0	0	0	0	0	0.0194327	0	0	0	0	0	0	7.14439e-05	0.0147532	3.57219e-05
control12-early post partum	0.00128599	0.00214332	0.333107	0	0.0014646	0.00843038	0.00250054	7.14439e-05	0.000678717	0.000142888	0.0214689	0.00250054	0.0139316	0.0123598	0.00132171	0.00539401	0.0561192	0.00335786	0.00389369	0.000357219	0	0.00482246	0.00210759	0.00017861	0.085947	0.00217904	0.00225048	7.14439e-05	0.0026077	0.0108237	0.0864114	3.57219e-05	0.00217904	0.000785883	0.0014646	3.57219e-05	0.000750161	0.00142888	0.00625134	0.00107166	7.14439e-05	0.00167893	0.00810888	0.00132171	0.00160749	0.00142888	0.00685861	0.000821605	0.00725155
control12-early pre-onset	0.000125027	0.000250054	0.0483854	0.000125027	0.000250054	0.00126813	0.000285776	0.275684	0.0112703	8.93049e-05	0.00310781	0.000946631	0.00160749	0.00169679	0.00017861	0.000642995	0.00871615	0.000446524	0.000392941	0.00139316	0.0150747	0.00092877	0.000107166	0.00221476	0.0100557	0.00037508	0.000339358	0.000250054	0.000250054	0.00555476	0.0134136	0.000196471	0.000267915	0.000142888	0.000214332	1.7861e-05	0.000214332	0.000214332	0.000821605	0.000517968	1.7861e-05	0.000500107	0.00117882	0.000142888	8.93049e-05	0.000250054	0.00100021	0.0504572	0.000803744
control12-late pre-onset	0	0	0.00121455	0.00175038	0	0	0	0.00378653	0	0	0	0	3.57219e-05	7.14439e-05	0	0	0.00017861	0	0	0.0217547	0.000464385	0	0	0.0430449	0.000321497	0	0	0	0	0	0.000142888	0.000500107	0	0	0	0	0	0	0	0.0108952	0	0	0	0	0	0	0	0.065907	0
control13-early disease	0	0	0.000464385	0	0	3.57219e-05	0	0.00017861	3.57219e-05	0	3.57219e-05	0	3.57219e-05	3.57219e-05	3.57219e-05	0	0.000142888	3.57219e-05	3.57219e-05	0.357469	0.00353647	7.14439e-05	0	0.0704079	7.14439e-05	3.57219e-05	3.57219e-05	0	0	0.000357219	0.000214332	7.14439e-05	0	0	0	0	0	0	0	0.0170394	0	0	0	0	0	0	0	0.0405801	0
control13-early post partum	5.35829e-05	7.14439e-05	0.0256662	5.35829e-05	0.000107166	0.000410802	0.000142888	0.000875188	0.388101	8.93049e-05	0.00103594	0.000214332	0.000642995	0.000696578	8.93049e-05	0.000428663	0.00189326	0.000107166	0.000250054	1.7861e-05	0	0.000446524	8.93049e-05	1.7861e-05	0.00496535	5.35829e-05	0.000160749	0.0791955	0.000125027	0.000839466	0.00491177	7.14439e-05	7.14439e-05	5.35829e-05	7.14439e-05	0	7.14439e-05	0.000107166	0.000285776	5.35829e-05	0.140423	0.000107166	0.00055369	3.57219e-05	1.7861e-05	5.35829e-05	0.000446524	8.93049e-05	0.000446524
control13-early pre-onset	0.000196471	1.7861e-05	0.0229692	3.57219e-05	7.14439e-05	0.000303636	5.35829e-05	0.128313	0.0798385	5.35829e-05	0.0010538	0.000607273	0.000857327	0.000946631	0.00017861	0.000464385	0.0037508	0.000321497	0.000160749	0.00262556	0.000428663	0.000392941	0.00017861	7.14439e-05	0.00442952	0.000232193	8.93049e-05	0.0144495	8.93049e-05	0.0114489	0.00676931	0.000160749	0.167018	3.57219e-05	0.000107166	0	3.57219e-05	5.35829e-05	0.000392941	8.93049e-05	5.35829e-05	3.57219e-05	0.000642995	0.000107166	3.57219e-05	8.93049e-05	0.000500107	0.0512253	0.000303636
control13-late pre-onset	0	3.57219e-05	0.000571551	0	0	0	3.57219e-05	0.0118597	7.14439e-05	0	0	0	0	0	0	3.57219e-05	3.57219e-05	0	0	0.118811	0.00257198	0	0	0.0292205	3.57219e-05	0	3.57219e-05	0	0	7.14439e-05	0.000214332	0.000464385	0	0	0	0	3.57219e-05	0	0	0.0419733	0	0	0	0	0	0	3.57219e-05	0.0749446	0
control14-early disease	0	0	0.000857327	0	0	0	3.57219e-05	0.000142888	3.57219e-05	0.0497607	0	0	3.57219e-05	3.57219e-05	0	0	0	0	0	0.000214332	0.000571551	3.57219e-05	0	0.068479	3.57219e-05	0	0	0	3.57219e-05	0.00957348	0.00017861	0.010538	0	0	0	0	0	0	0	0.0164678	0	0	0	0	0	0	0	0.00310781	3.57219e-05
control14-early post partum	0.00446524	0.00339358	0.294385	0	7.14439e-05	0.00650139	0.00189326	0.000142888	3.57219e-05	7.14439e-05	0.0402229	0	0.0250054	0.00925198	0.00542973	0.00503679	0.00110738	0	0.00182182	0.000250054	0	0.00689433	0.0052154	7.14439e-05	0.0876259	0.00417947	0.00221476	0	0.00793027	0.00207187	0.0480817	0.000285776	0.00217904	0.000107166	0	0	0.00460813	0.0032507	0.000214332	0.000535829	0	0.00214332	0.0112881	0.00682289	0.00450096	0.00425091	0.000285776	0.000250054	0.00839466
control14-early pre-onset	3.57219e-05	0	0.00250054	0	0	3.57219e-05	7.14439e-05	0.0183254	0.000142888	0	0.000392941	0	0.000285776	0	0	3.57219e-05	0	0	0	0.0119311	0.0224334	0	3.57219e-05	0	0.000392941	0	0	0	7.14439e-05	0.000571551	0.000357219	0	3.57219e-05	0	0	0	3.57219e-05	0	0	0.937487	3.57219e-05	0	0.00017861	0.000107166	0	3.57219e-05	0	3.57219e-05	0.000107166
control14-late pre-onset	0	0	0.000214332	0	0	3.57219e-05	0	0	3.57219e-05	0.0278988	3.57219e-05	0	0	3.57219e-05	0	0	0	0	0	3.57219e-05	0.000214332	0	3.57219e-05	0.0103236	3.57219e-05	0	0	0	0	0.00482246	0	0.00592984	3.57219e-05	0	0	0	0	3.57219e-05	0	0.00596556	0	0	0	0	0	0	0	0.0138958	3.57219e-05
control15-early disease	0	0	0.000238146	0	0	1.19073e-05	0	0.00681098	5.95366e-05	1.19073e-05	0	0	0	0	0	0	4.76293e-05	0	0	0.162166	0.00222667	0	1.19073e-05	0	7.14439e-05	0	0	1.19073e-05	0	7.14439e-05	8.33512e-05	0.000321497	0	0	1.19073e-05	2.38146e-05	0	0	0.00017861	0.000214332	0	0	0	0	0	0	4.76293e-05	0.0765283	0
control15-early post partum	0.0037508	0.00289348	0.340644	0	0	0.00642995	0.00310781	0	0.000214332	3.57219e-05	0.0411874	0	0.0248267	0.0107523	0.00557262	0.00542973	0.00189326	0	0.00221476	0.000535829	0	0.00696578	0.00589412	7.14439e-05	0.0316854	0.00332214	0.00603701	0	0.00743016	0.00221476	0.0450811	0.000142888	0.00250054	0.000142888	3.57219e-05	0.000428663	0.00482246	0.00300064	0.000357219	0.000464385	0.000107166	0.00221476	0.0099307	0.00546546	0.00400086	0.00425091	0.000428663	0.00171465	0.0145388
control15-early pre-onset	0.00110738	0.000750161	0.089412	0	0	0.00150032	0.000821605	0.182075	3.57219e-05	0	0.011181	0	0.007323	0.00342931	0.00139316	0.00135743	0.000714439	0	0.000642995	0.000107166	0.00200043	0.00200043	0.0017861	0.00017861	0.0103951	0.00107166	0.000750161	0	0.00264342	0.000607273	0.0128956	0.000392941	0.000893049	3.57219e-05	0	0	0.0011431	0.000964492	3.57219e-05	0.000107166	0.000464385	0.000821605	0.0029292	0.00203615	0.00121455	0.00135743	0.000107166	0.0382225	0.00200043
control15-late pre-onset	0	0	3.57219e-05	0	0	0	0	0.00896621	0	0	0	0	0	0	0	0	0	0	0	0	0.00017861	0	0	0	0	0	0	0	0	0	7.14439e-05	0.000500107	0	0	0	0	0	0	0	0	0	0	0	0	0	0	0	0.0701936	0
control16-early disease	0	0	8.93049e-05	0.000303636	0	0	0	0.000250054	0.000142888	0.0054476	0	0	0	0	0	0	0	1.7861e-05	0	0.0429914	0.00278631	0	0	0.0743374	3.57219e-05	0	0	5.35829e-05	0	0.00153604	3.57219e-05	0.000964492	0	0	0	0	0	0	3.57219e-05	0.00153604	0	0	0	1.7861e-05	0	0	0	0.000982353	0
control16-early post partum	0.00185754	0.00101808	0.182593	0.00135743	0.0121633	0.00455455	0.00151818	0.000571551	0.00210759	7.14439e-05	0.0104665	0.00428663	0.0106809	0.00839466	0.000267915	0.00130385	0.0312746	0.0125384	0.0025184	0.00671572	3.57219e-05	0.00194685	0.000803744	0.000303636	0.0412946	0.0014646	0.00116096	0.00017861	0.00162535	0.00826963	0.0551904	0.000142888	0.00289348	0.00712653	0.0136994	0.0135029	0.000410802	0.000250054	0.136654	0.00107166	0.000196471	0.00132171	0.00337572	0.000464385	0.000607273	0.000803744	0.0244338	0.00507252	0.00246481
control16-early pre-onset	0.000446524	0.000267915	0.0517254	0.000589412	0.00305423	0.00119669	0.000696578	0.000250054	0.00169679	0.0373473	0.00287562	0.000500107	0.00303636	0.00266128	0.000125027	0.000642995	0.00909123	0.0040723	0.0007323	0.000303636	3.57219e-05	0.000357219	0.000107166	0.0629421	0.012717	0.000410802	0.000321497	5.35829e-05	0.000339358	0.00696578	0.0165393	0.00760877	0.000428663	0.00216118	0.00403658	0.00342931	0.000125027	0.000125027	0.0357398	0.00055369	1.7861e-05	0.000535829	0.0010538	0.000142888	0.000107166	0.000214332	0.00721583	0.038151	0.000696578
control16-late pre-onset	0	0	0.000714439	0	0	1.7861e-05	1.7861e-05	0.000285776	0.00560834	0.0372401	5.35829e-05	0	1.7861e-05	1.7861e-05	0	0	0	0	0	0.0392584	0.000857327	1.7861e-05	0	0.137726	0.000107166	0	0	0.000303636	0	7.14439e-05	0.000232193	0.00734086	0	0	0	0	0	0	5.35829e-05	0.00125027	7.14439e-05	0	0	0	0	0	1.7861e-05	0.00453669	1.7861e-05
control17-early disease	3.57219e-05	0	0.000678717	0	0	3.57219e-05	0	0.00017861	3.57219e-05	0	3.57219e-05	0	0	0.000107166	0	7.14439e-05	0	0	0	0.0221476	0.000142888	0	0	0.274952	3.57219e-05	0	0	0	3.57219e-05	0.133779	0.00017861	0.0294706	0	0	0	0	0	0	0	0.0465457	0	0	0	0	0	0	0	0.0204687	3.57219e-05
control17-early post partum	0.00478674	0.00342931	0.375116	0	0	0.00400086	0.00275059	0.00250054	0.000893049	0	0.0375795	0	0.0231121	0.0099307	0.00592984	0.00289348	0.00200043	0	0.00189326	0.00017861	0.00171465	0.00775166	0.00660856	3.57219e-05	0.01311	0.00300064	0.00425091	0.000214332	0.00650139	0.00214332	0.0474745	3.57219e-05	0.0026077	3.57219e-05	0	0	0.00410802	0.00328642	0.000357219	0.000250054	0	0.00235765	0.0101093	0.00621562	0.00207187	0.00453669	0.000107166	0.000357219	0.00907337
control17-early pre-onset	3.57219e-05	0	0.00400086	0	0	0	0	0.098021	7.14439e-05	0	0.000607273	0	0.000321497	0	3.57219e-05	0	0	0	0	0.0834107	0.0078231	0	0.000107166	0	0.000107166	7.14439e-05	0	0	0.000214332	0.000464385	0.000535829	0	0	0	0	0	3.57219e-05	0	0	0.760663	0	0	3.57219e-05	7.14439e-05	0	0.000107166	0	0	0.000107166
control17-late pre-onset	0	0	0.000714439	0	0	3.57219e-05	0	0.00718011	0.0288633	0	7.14439e-05	0	3.57219e-05	7.14439e-05	0	3.57219e-05	0	0	0	0.188612	0.000642995	0	0	0	0	0	0	0.00757305	0	0.289026	3.57219e-05	0	0	0	0	0	0	0	0	0.378581	0	0	3.57219e-05	0	0	7.14439e-05	0	3.57219e-05	3.57219e-05
control2-early disease	0.000107166	0.000250054	0.00803744	0	0	0.000357219	0.000107166	0.00428663	7.14439e-05	7.14439e-05	0.00139316	0	0.000642995	0.000392941	0.000107166	0.00017861	3.57219e-05	0	7.14439e-05	0	0	0.000107166	0.000285776	0	0.00160749	0.000142888	0.000142888	0	0.000392941	7.14439e-05	0.00139316	0.000428663	3.57219e-05	0	0	0	0.00017861	3.57219e-05	3.57219e-05	0.000107166	3.57219e-05	7.14439e-05	0.000321497	0.000214332	0.000250054	7.14439e-05	0	0.0729085	0.000357219
control2-early post partum	0.00421519	0.00296492	0.368936	0	0	0.00425091	0.00239337	7.14439e-05	0.000357219	3.57219e-05	0.0421162	0	0.0255412	0.0100736	0.00464385	0.00246481	0.00310781	3.57219e-05	0.00271487	0.000285776	0	0.00753733	0.00607273	3.57219e-05	0.0193256	0.0032507	0.00492963	3.57219e-05	0.00889476	0.00242909	0.0475102	7.14439e-05	0.00214332	7.14439e-05	0.000107166	0.000107166	0.00746589	0.00346503	0.000142888	0.000714439	7.14439e-05	0.00264342	0.0109666	0.00614417	0.00282203	0.00421519	7.14439e-05	0	0.00985926
control2-early pre-onset	0.00339358	0.00264342	0.264664	3.57219e-05	3.57219e-05	0.00253626	0.00196471	0.230907	0.000321497	3.57219e-05	0.0335786	3.57219e-05	0.0203972	0.00839466	0.00353647	0.00160749	0.00207187	0	0.00142888	0.000392941	0	0.00596556	0.00500107	0	0.031471	0.00253626	0.00210759	0	0.00539401	0.00121455	0.0335072	7.14439e-05	0.00242909	0	7.14439e-05	0	0.00657284	0.00210759	0.00017861	7.14439e-05	0.000500107	0.00246481	0.00807316	0.00475102	0.00132171	0.00303636	0.00017861	3.57219e-05	0.00760877
control2-late pre-onset	0.00185754	0.0032507	0.301172	0	3.57219e-05	0.00364364	0.00192898	0.178145	0.0011431	3.57219e-05	0.032507	7.14439e-05	0.0212903	0.00857327	0.00332214	0.00235765	0.000893049	0	0.000464385	0.000107166	0	0.00546546	0.00517968	0	0.0541187	0.00200043	0.00457241	0.000142888	0.00400086	0.00160749	0.0367222	0	0.000500107	0.00017861	7.14439e-05	0	0.00150032	0.00250054	0.000214332	0.000142888	0.000107166	0.00192898	0.00871615	0.00321497	0.00285776	0.00332214	0.000285776	0.000107166	0.00843038
control3-early disease	0	0	0.00017861	0.000357219	0	0	0	0.0166107	0.000321497	0	0	0	0	0	0	0	3.57219e-05	0	0	0.0120383	0	0	0	0.000214332	0	0	0	0	0	0	7.14439e-05	3.57219e-05	0.654712	0	0	0	0	0	0	0.000250054	0	0	0	0	0	0	0	0.000357219	0
control3-early post partum	0.00264342	0.00100021	0.251572	0.000339358	0.00566193	0.0052154	0.00180396	0.000196471	0.00100021	0.000500107	0.0122526	0.00469744	0.0101629	0.0102522	0.000714439	0.00446524	0.0384904	0.00743016	0.00257198	0.00189326	0.000107166	0.00376866	0.00092877	0.000571551	0.0643352	0.00110738	0.00169679	7.14439e-05	0.00132171	0.00796599	0.0589233	0.000750161	0.0014646	0.00339358	0.00616203	0.00734086	0.000607273	0.000893049	0.0631743	0.00417947	0.000125027	0.000785883	0.0059477	0.00133957	0.00164321	0.00119669	0.0133243	0.00514396	0.00332214
control3-early pre-onset	0.00428663	0.000410802	0.161945	0.000142888	0.0132171	0.00482246	0.00092877	0.00108952	0.00396514	8.93049e-05	0.00809102	0.00421519	0.00707294	0.00714439	0.000196471	0.00141102	0.0461885	0.0129135	0.00207187	0.00183968	0.000107166	0.00164321	0.000500107	0.00200043	0.0398121	0.00100021	0.00125027	0.000446524	0.00117882	0.00803744	0.0502072	3.57219e-05	0.012717	0.00671572	0.0151818	0.0175395	0.000267915	8.93049e-05	0.120311	0.00232193	0.000160749	0.00103594	0.0029292	0.00144674	0.000535829	0.000642995	0.020808	0.00509038	0.00158963
control3-late pre-onset	0	0	0.000500107	3.57219e-05	0	0	0	0.0350432	0.0260056	0	0	3.57219e-05	0	3.57219e-05	0	0	0.000107166	0.000142888	0	0.000142888	0	0	0	0	7.14439e-05	3.57219e-05	7.14439e-05	0.0070015	0	3.57219e-05	0.000392941	0	0.918733	3.57219e-05	3.57219e-05	7.14439e-05	0	0	0.00092877	0	0	3.57219e-05	0	0	0	0	0.000214332	0.000714439	0
control4-early disease	1.7861e-05	0	0.0022862	0.0629242	3.57219e-05	8.93049e-05	1.7861e-05	1.7861e-05	0	0.0511002	0.000142888	1.7861e-05	0.000125027	0.000107166	0	1.7861e-05	0.000392941	1.7861e-05	0	0.00944845	0	3.57219e-05	0	0.000232193	0.000589412	0	7.14439e-05	0	3.57219e-05	3.57219e-05	0.000875188	0.00825177	0	1.7861e-05	3.57219e-05	0	0	0	0	0.000214332	0	1.7861e-05	7.14439e-05	1.7861e-05	0	1.7861e-05	5.35829e-05	0.0139673	5.35829e-05
control4-early post partum	0.00303636	0.0011431	0.28724	0.00135743	0.00203615	0.00510824	0.00128599	0.000107166	0.00978781	0	0.0137529	0.00296492	0.00907337	0.0176109	0.000714439	0.00396514	0.103415	0.00507252	0.00232193	0.000321497	0	0.00475102	0.00132171	0.000107166	0.062049	0.00171465	0.00232193	0.00100021	0.00464385	0.0185754	0.0790884	0	0.000964492	0.00217904	0.00414375	0.000142888	0.000750161	0.00210759	0.0139316	0.00346503	0.00100021	0.000714439	0.00678717	0.00271487	0.00107166	0.00107166	0.00996642	0.00121455	0.00250054
control4-early pre-onset	8.93049e-05	7.14439e-05	0.0393299	5.35829e-05	5.35829e-05	0.000714439	0.000107166	3.57219e-05	0.394174	8.93049e-05	0.00176824	3.57219e-05	0.000714439	0.00119669	0.000107166	0.000410802	0.0014646	0.000214332	0.000125027	5.35829e-05	0	0.000517968	0.000125027	0.00169679	0.00753733	5.35829e-05	0.000339358	0.0120026	0.000160749	0.00107166	0.00980567	0.000125027	5.35829e-05	7.14439e-05	0.000142888	0	3.57219e-05	5.35829e-05	0.000571551	0.00107166	0.00334	0.000107166	0.0007323	8.93049e-05	0.000232193	8.93049e-05	0.00107166	0.0461885	0.000285776
control4-late pre-onset	0	0	3.57219e-05	0.0971994	0	0	0	0.00378653	0	0.00167893	0	0	0	0	0	0	3.57219e-05	0	0	0.000250054	0	0	0	0.000107166	0	0	0	0	0	0	7.14439e-05	0.000535829	0	0	0	0	0	0	0	0	0	0	0	0	0	0	0	0.0823391	0
control5-early disease	0	0	0.00117882	0.0796956	0	0	3.57219e-05	0.000500107	0.000642995	0.000214332	0.000107166	0	0	0	0	3.57219e-05	0.000250054	3.57219e-05	0	0.000785883	0	0	0	0	0.000321497	0	3.57219e-05	0	0	0	0.000250054	0.000107166	0	0	0	0	0	3.57219e-05	3.57219e-05	3.57219e-05	7.14439e-05	0	0	0	3.57219e-05	0	3.57219e-05	0.0220047	0.000107166
control5-early post partum	0.00239337	0.00150032	0.188219	7.14439e-05	0.011824	0.00550118	0.00132171	0.000107166	0.000464385	0.00017861	0.0108237	0.00464385	0.00889476	0.00882332	0.000357219	0.00185754	0.0373651	0.0139316	0.00346503	0.00117882	3.57219e-05	0.00185754	0.000678717	0.0029292	0.0541545	0.00150032	0.00157177	0	0.00171465	0.00793027	0.0604058	7.14439e-05	0.00271487	0.00710867	0.0142888	0.0105737	0.000464385	0.000107166	0.140173	0.000571551	0.00017861	0.00157177	0.00421519	0.00103594	0.00132171	0.000857327	0.024791	0.00128599	0.00221476
control5-early pre-onset	0.00103594	0.000321497	0.107594	3.57219e-05	0.00592984	0.00257198	0.000768022	0.000571551	0.00269701	5.35829e-05	0.00566193	0.00207187	0.00430449	0.00469744	0.000142888	0.000910909	0.0160927	0.00651925	0.00141102	0.000857327	1.7861e-05	0.000964492	0.000196471	0.00200043	0.0262735	0.000714439	0.000785883	0.000428663	0.000464385	0.00357219	0.0326141	0	0.0197185	0.00355433	0.0061799	0.00564407	0.000214332	0.00017861	0.0646389	0.00112524	0.138047	0.000535829	0.00185754	0.000500107	0.000714439	0.00037508	0.0118597	0.000893049	0.00117882
control5-late pre-onset	0	3.57219e-05	0.00275059	0.271165	3.57219e-05	3.57219e-05	0	0.083125	0.0114667	0.000678717	7.14439e-05	3.57219e-05	3.57219e-05	0.000107166	0	3.57219e-05	0.000285776	3.57219e-05	7.14439e-05	0	3.57219e-05	7.14439e-05	3.57219e-05	0	0.000392941	0	3.57219e-05	0.00150032	0.000107166	0.000107166	0.000857327	0.00017861	7.14439e-05	0	0	0	3.57219e-05	0	3.57219e-05	0	7.14439e-05	7.14439e-05	0.000142888	0	0	0	3.57219e-05	0.0504037	0
control6-early disease	0	0	0.00110738	0.00346503	0	1.7861e-05	0	0.00162535	0	0.0424377	5.35829e-05	0	1.7861e-05	3.57219e-05	0	1.7861e-05	0.000107166	1.7861e-05	1.7861e-05	0.000750161	0.000160749	0	0	0.120829	0.000107166	0	0	0	3.57219e-05	7.14439e-05	0.000339358	0.00882332	0	1.7861e-05	1.7861e-05	0	0	0	1.7861e-05	0.0385976	0	1.7861e-05	1.7861e-05	0	0	1.7861e-05	1.7861e-05	0.0485818	5.35829e-05
control6-early post partum	0.00126813	0.00158963	0.326445	7.14439e-05	0.000982353	0.00871615	0.00294706	0.000107166	0.000482246	0	0.0190755	0.00225048	0.0136458	0.0122169	0.00153604	0.0052154	0.0421519	0.00337572	0.00294706	0.00526899	3.57219e-05	0.00582268	0.00182182	0.00141102	0.0781239	0.00225048	0.00221476	1.7861e-05	0.00237551	0.00935915	0.0863757	1.7861e-05	0.00151818	0.000875188	0.00121455	1.7861e-05	0.000660856	0.000910909	0.00605487	0.00148246	5.35829e-05	0.00150032	0.00832321	0.00137529	0.00153604	0.00157177	0.0061799	0.00133957	0.00714439
control6-early pre-onset	0.0014646	0.00180396	0.304905	0.000267915	0.00103594	0.00735872	0.00235765	8.93049e-05	0.0494213	1.7861e-05	0.0187004	0.00442952	0.0128242	0.0120919	0.00100021	0.00457241	0.0643531	0.00332214	0.00417947	0.00133957	3.57219e-05	0.00485818	0.00150032	0.000482246	0.0664607	0.00257198	0.00200043	0.000946631	0.00266128	0.0100021	0.0761235	3.57219e-05	0.00267915	0.00101808	0.00158963	1.7861e-05	0.00133957	0.000910909	0.00616203	0.000696578	0.000250054	0.00176824	0.00730514	0.00121455	0.000875188	0.00151818	0.00635851	0.00037508	0.00771594
control6-late pre-onset	0	0	0.0015539	0	0	5.35829e-05	1.7861e-05	0.0100557	0.24532	0	7.14439e-05	1.7861e-05	3.57219e-05	0.000107166	3.57219e-05	0	0.000321497	0	0	0.00321497	0	0.000107166	0	0.217243	0.000321497	1.7861e-05	0	0.00298278	0	7.14439e-05	0.000571551	0	0	0	0	0	1.7861e-05	1.7861e-05	3.57219e-05	0.492641	0	0	1.7861e-05	1.7861e-05	0	5.35829e-05	8.93049e-05	1.7861e-05	0
control7-early disease	1.7861e-05	0	0.00151818	0.0101808	0	1.7861e-05	1.7861e-05	0.00196471	0	0.0176109	3.57219e-05	0	3.57219e-05	8.93049e-05	0	3.57219e-05	0.000142888	0	1.7861e-05	0.000125027	0.00055369	0	0	0	0.000321497	1.7861e-05	0	0	0	3.57219e-05	0.000392941	0.00282203	1.7861e-05	0	0	0	0	0	7.14439e-05	0.0161999	0	0	0	0	1.7861e-05	0	1.7861e-05	0.0512431	0
control7-early post partum	0.00158963	0.00151818	0.349789	0.000285776	0.00121455	0.0087876	0.00183968	7.14439e-05	0.0015539	1.7861e-05	0.0235765	0.00223262	0.0133957	0.0128599	0.00116096	0.00560834	0.041491	0.00334	0.00269701	0.00100021	1.7861e-05	0.00598343	0.00126813	0.000428663	0.0847503	0.00233979	0.00223262	0.000285776	0.00246481	0.0107702	0.0903051	1.7861e-05	0.00141102	0.00100021	0.0014646	1.7861e-05	0.000803744	0.000803744	0.00657284	0.00130385	8.93049e-05	0.00221476	0.00891262	0.00121455	0.00166107	0.00151818	0.00632278	0.000607273	0.00514396
control7-early pre-onset	0.0007323	0.000910909	0.169018	1.7861e-05	0.000482246	0.00409016	0.000964492	0.230639	0.254894	0	0.0108416	0.00173251	0.00635851	0.00630492	0.000517968	0.00314353	0.0287383	0.00162535	0.00171465	0.00017861	0.00484032	0.00264342	0.000785883	0.00017861	0.0452061	0.00121455	0.00128599	0.00214332	0.00139316	0.00566193	0.0426877	0	0.00110738	0.000589412	0.000696578	0	0.000446524	0.000678717	0.00262556	0.000678717	3.57219e-05	0.00130385	0.00414375	0.000839466	0.000714439	0.000750161	0.00326856	0.000392941	0.00391155
control7-late pre-onset	0	1.7861e-05	0.00444738	0.105344	0	7.14439e-05	7.14439e-05	0.0944309	0.329463	0.000160749	0.000142888	7.14439e-05	0.000125027	8.93049e-05	0	3.57219e-05	0.000642995	1.7861e-05	1.7861e-05	0	0.0617811	3.57219e-05	3.57219e-05	0	0.00101808	1.7861e-05	3.57219e-05	0.00121455	0	0.000250054	0.000893049	0.000107166	0	0	5.35829e-05	0	1.7861e-05	0	0.000125027	0.00216118	5.35829e-05	1.7861e-05	8.93049e-05	1.7861e-05	1.7861e-05	5.35829e-05	0.000125027	0.0379188	0.000142888
control8-early disease	3.57219e-05	0	0.000321497	0	0	0	0	0.000571551	0	0.049332	3.57219e-05	0	0	3.57219e-05	3.57219e-05	0	0	0	0	0.0160034	0	0	0	0	0	0	0	0	0	0	0.00017861	0.0104665	0	0	0	0	0	0	0	7.14439e-05	0	0	0	0	7.14439e-05	0	0	0.0466171	0
control8-early post partum	0.00350075	0.00335786	0.31396	7.14439e-05	0	0.00925198	0.00250054	7.14439e-05	0.000214332	0	0.0384725	0	0.0235408	0.00953776	0.00503679	0.00900193	0.00257198	0	0.00214332	0.000678717	0	0.00778738	0.00592984	0.000142888	0.0599414	0.00450096	0.00310781	3.57219e-05	0.00657284	0.0026077	0.0457955	0.000142888	0.00328642	0.000321497	0	0	0.00385797	0.00339358	0.000321497	0.000678717	0.000285776	0.00253626	0.011431	0.00657284	0.00525113	0.00496535	0.000357219	0.000571551	0.0116454
control8-early pre-onset	0.00635851	0.00289348	0.32732	3.57219e-05	0	0.0078231	0.00235765	0	0.000107166	3.57219e-05	0.0351861	0	0.0257912	0.0112881	0.00532257	0.00818032	0.00221476	0	0.0017861	0.000285776	0	0.0058584	0.00746589	0	0.0325784	0.00328642	0.0061799	0	0.00821605	0.00185754	0.0494034	0.000250054	0.00403658	0	0	0	0.0043938	0.00307209	0.000285776	0.000428663	3.57219e-05	0.00339358	0.0103951	0.0096092	0.00478674	0.00546546	0.000428663	0.000500107	0.00903765
control8-late pre-onset	0	0	0.000428663	0	0	0	0	0.00135743	0	0.0234693	0	0	0	0	0	0	0	0	0	0	0	0	0	0	0	0	0	0	0	0	7.14439e-05	0.00596556	0	0	0	0	0	0	0	3.57219e-05	0	0	7.14439e-05	0	0	0	0	0.0546903	3.57219e-05
control9-early disease	0	0	0.000285776	0	0	0	0	0.00150032	7.14439e-05	7.14439e-05	0	0	0	0	0	0	0	0	0	0.00092877	0.000107166	3.57219e-05	0	3.57219e-05	3.57219e-05	0	0	0	0	0.000464385	7.14439e-05	0.0327213	0.000678717	0	0	0	0	0	0	0.0528327	3.57219e-05	0	0	3.57219e-05	0	0	0	0.000678717	0
control9-early post partum	0.000714439	0.000285776	0.0375438	0	0	0.000607273	0.000392941	0.000142888	0.00017861	0	0.0084661	0	0.0040723	0.000893049	0.000571551	0.000142888	0.000428663	0	7.14439e-05	0.865686	0	0.000785883	0.000714439	7.14439e-05	0.00321497	0.000678717	0.000142888	0	0.00125027	0.000142888	0.00535829	0.000107166	0.000357219	3.57219e-05	0	0	0.0011431	0.000392941	3.57219e-05	0.00117882	0	0.000535829	0.000785883	0.000964492	7.14439e-05	0.000285776	0	3.57219e-05	0.00150032
control9-early pre-onset	0.000107166	3.57219e-05	0.00989498	0	0	0.000321497	0	0.000142888	0.0768736	0	0.00142888	0	0.00100021	0.000142888	0.000107166	7.14439e-05	0.000107166	0	3.57219e-05	0.867757	0	0.000107166	0.000250054	3.57219e-05	0.000857327	0.00017861	7.14439e-05	0.0227906	0.000321497	0.000107166	0.00107166	0	0.000142888	0	0	0	0.00017861	7.14439e-05	0	0.00139316	0.000285776	3.57219e-05	0.00017861	0.00017861	3.57219e-05	0.00017861	0	3.57219e-05	0.000464385
control9-late pre-onset	0.00278631	0.00214332	0.225691	3.57219e-05	0	0.00353647	0.00167893	0.272666	0.000893049	0.000357219	0.030578	0.000107166	0.0167536	0.00503679	0.00285776	0.00160749	0.00153604	0	0.00132171	0.000464385	0.000285776	0.00428663	0.0040723	0.00392941	0.028899	0.00239337	0.00164321	0.000357219	0.00528685	0.00367936	0.0336143	0.000142888	0.00164321	7.14439e-05	3.57219e-05	0	0.00496535	0.00217904	0.000285776	0.00132171	0.00242909	0.00232193	0.00671572	0.00360792	0.000821605	0.00289348	0	0.000964492	0.00614417
LOS1-early disease	1.19073e-05	0	0.000642995	0	4.76293e-05	0	0	0.331226	0.0111214	1.19073e-05	2.38146e-05	0	1.19073e-05	2.38146e-05	1.19073e-05	0	0.000107166	4.76293e-05	1.19073e-05	0	0	0	0	0	0.000166702	0	0	0.000321497	0	2.38146e-05	0.000142888	0.000226239	0	0	9.52585e-05	2.38146e-05	0	0	0.000381034	0	5.95366e-05	0	0	0	0	0	0.000142888	0.0623586	0
LOS1-early post partum	0.000571551	0.000857327	0.179021	0.00135743	0.00998428	0.00464385	0.00101808	0.011306	0.00278631	3.57219e-05	0.0103594	0	0.00798385	0.00862685	0.000267915	0.00133957	0.0312031	0.0127349	0.00258984	0.000982353	0.00130385	0.00162535	0.000571551	3.57219e-05	0.0494034	0.00150032	0.000964492	0.000285776	0.000857327	0.00682289	0.0549225	0.000142888	0.000875188	0.00755519	0.0132528	0.0105201	0.000232193	0.00017861	0.117168	0.019915	0.000464385	0.00137529	0.00273273	0.000339358	0.000714439	0.00055369	0.0234515	0.0144138	0.00208973
LOS1-early pre-onset	0.000785883	0.000857327	0.19522	0	0.0119669	0.00514396	0.00153604	0.00017861	0.00525113	0	0.0123955	3.57219e-05	0.0109309	0.0070015	0.000357219	0.00132171	0.038794	0.0142888	0.00296492	0.000785883	0	0.00192898	0.00100021	0	0.0489391	0.00160749	0.00121455	0.000142888	0.0011431	0.00628706	0.0602986	0.000142888	0.0011431	0.00907337	0.0156105	0.012074	0.000357219	0.000250054	0.148996	0.000750161	0.000392941	0.0014646	0.00382225	0.000428663	0.000428663	0.00110738	0.0293277	0.000785883	0.00278631
LOS1-late pre-onset	5.35829e-05	5.35829e-05	0.0130206	3.57219e-05	5.35829e-05	0.000125027	0.000107166	0.0572087	0.340984	0	0.000625134	0.000232193	0.000339358	0.000357219	7.14439e-05	0.000392941	0.00142888	7.14439e-05	7.14439e-05	0	0	0.000125027	1.7861e-05	0	0.00276845	1.7861e-05	5.35829e-05	0.0605308	0.000107166	0.000303636	0.00266128	0.000107166	0.000428663	1.7861e-05	7.14439e-05	0	5.35829e-05	7.14439e-05	0.000196471	3.57219e-05	0	7.14439e-05	0.00037508	8.93049e-05	3.57219e-05	3.57219e-05	0.00017861	0.047528	0.000250054
LOS2-early disease	1.19073e-05	2.38146e-05	0.00396514	0.000607273	0.000250054	7.14439e-05	1.19073e-05	0.00285776	0	0.000202424	0.00017861	8.33512e-05	0.00013098	0.000250054	0	4.76293e-05	0.000809697	0.000261961	3.57219e-05	0.00133362	1.19073e-05	2.38146e-05	0	0.00136934	0.00127408	2.38146e-05	3.57219e-05	0	9.52585e-05	0.000250054	0.00125027	0.00030959	7.14439e-05	0.000250054	0.000321497	0.000285776	0	0	0.00294111	0.000702531	4.76293e-05	3.57219e-05	0.000166702	0	0	1.19073e-05	0.000559644	0.0957943	5.95366e-05
LOS2-early post partum	0.0026077	0.00121455	0.164857	0	0.0132528	0.00489391	0.000535829	0.000571551	0.00257198	0	0.0112881	0.00132171	0.0113239	0.00793027	7.14439e-05	0.00100021	0.0334357	0.0108595	0.00264342	3.57219e-05	3.57219e-05	0.0014646	0.000500107	0.000142888	0.0344717	0.00164321	0.00121455	0.000250054	0.000893049	0.0980567	0.0490105	0.000285776	0.00117882	0.00682289	0.0145388	0.0132528	0.000535829	0.000535829	0.130171	0.000464385	0.000107166	0.00142888	0.00278631	0.000857327	0.00103594	0.00153604	0.0252197	0.0026077	0.0011431
LOS2-early pre-onset	0.00253626	0.00171465	0.204544	0.000107166	0.0110381	0.00600129	0.000821605	7.14439e-05	0.00200043	0.000107166	0.0125384	0.00092877	0.0125027	0.00871615	0.00017861	0.00128599	0.0138958	0.0133243	0.00117882	0.000357219	0	0.00164321	0.000642995	0.000714439	0.0453311	0.00235765	0.00100021	0.000250054	0.00132171	0.0110024	0.0625491	0.000214332	0.000857327	0.00725155	0.0146817	0.0108952	0.000285776	0.000285776	0.138315	0.00539401	3.57219e-05	0.00150032	0.00460813	0.000785883	0.00092877	0.000893049	0.0259699	0.00267915	0.00153604
LOS2-late pre-onset	0	0	0.000142888	0	0	0	0	0	3.57219e-05	0.000107166	0	0	0	0	0	0	0	0	0	0.000214332	0	0	0	0	0	0	0	0	0	0	3.57219e-05	0.00017861	0	0	0	0	0	0	3.57219e-05	0.0084661	0	0	0	0	0	0	0	0.0934486	0
LOS3-early disease	0	0	0.000285776	0	0	3.57219e-05	0	0.000107166	0.00182182	0.0167893	1.7861e-05	0	0	3.57219e-05	0	0	1.7861e-05	3.57219e-05	0	0.0123062	0	0	0	0	3.57219e-05	0	0	0.000303636	0	5.35829e-05	8.93049e-05	0.00269701	0.000232193	1.7861e-05	1.7861e-05	1.7861e-05	0	0	0.000321497	0.000107166	0	0	0	0	1.7861e-05	0	8.93049e-05	0.121187	1.7861e-05
LOS3-early post partum	0.00101808	0.000410802	0.0866793	1.7861e-05	0.00587626	0.00232193	0.000196471	0.000714439	0.000267915	0.000946631	0.00541187	0.00137529	0.00373294	0.0036615	8.93049e-05	0.000642995	0.0164678	0.00623348	0.000660856	0.0775523	0.000142888	0.00101808	0.000232193	0	0.0237015	0.000696578	0.000660856	1.7861e-05	0.000410802	0.00660856	0.0279524	0.000214332	0.000750161	0.00339358	0.00485818	0.00437594	0.000125027	3.57219e-05	0.0579588	0.419233	0.000107166	0.000821605	0.00128599	0.000428663	0.000303636	0.000339358	0.0137708	0.00278631	0.000696578
LOS3-early pre-onset	0.000660856	0.000303636	0.06012	0.000250054	0.00453669	0.00191112	0.000303636	0.00017861	0.000821605	1.7861e-05	0.00369722	0.000660856	0.00414375	0.00266128	0.000160749	0.000321497	0.0127527	0.00451883	0.000750161	0.304976	7.14439e-05	0.00055369	0.000339358	0.000196471	0.0166107	0.000535829	0.000464385	3.57219e-05	0.00055369	0.00298278	0.0187897	3.57219e-05	0.000446524	0.00267915	0.0054476	0.00378653	0.00037508	3.57219e-05	0.0440094	0.343663	8.93049e-05	0.000410802	0.00121455	0.000267915	0.000410802	0.000357219	0.00809102	0.00391155	0.000571551
LOS3-late pre-onset	0	1.7861e-05	0.00132171	0	0	1.7861e-05	0	0.00385797	0.00130385	0.0325427	1.7861e-05	1.7861e-05	3.57219e-05	3.57219e-05	0	0	7.14439e-05	3.57219e-05	0	0.00291134	0.00017861	0	0	0	0.00037508	5.35829e-05	0	0	0	0.00226834	0.000285776	0.0076445	0.000125027	7.14439e-05	8.93049e-05	7.14439e-05	0	0	0.000714439	0.00576909	0	0	1.7861e-05	0	0	3.57219e-05	0.00017861	0.0461349	0
[truncated: 23 more columns]

## Sheet: CTLvsLOS
	ZIBR model				LME model
	p_Time	p_Treat	FDR adjusted p_Treat		p_Time	p_Treat	FDR adjusted p_Treat
OTU317	1.11811e-12	0.369734	0.856796		1.10028e-13	0.79282	0.944092
OTU57	2.22045e-16	0.234426	0.767212		4.08322e-14	0.801714	0.944092
OTU30	6.99441e-14	0.969338	0.99523		2.17835e-16	0.890699	0.94728
OTU738	0.0548978	0.881341	0.940489		0.0627054	0.508666	0.875325
OTU736	5.51619e-09	0.0109224	0.0786414		9.61609e-08	0.00550579	0.0733711
OTU128	2.22045e-15	0.552053	0.881955		1.79924e-16	0.570016	0.875325
OTU322	2.03171e-14	0.382501	0.856796		8.52829e-15	0.493869	0.875325
OTU25	0.64256	0.865158	0.940489		0.853032	0.809399	0.944092
OTU861	8.21011e-05	0.801814	0.916359		0.382177	0.897659	0.94728
OTU1243	0.161185	0.729418	0.881955		0.000394001	0.980227	0.980227
OTU1026	2.53131e-14	0.327306	0.856796		4.7456e-15	0.583198	0.875325
OTU1111	2.21844e-08	0.216584	0.765274		7.9052e-08	0.901449	0.94728
OTU46	2.44249e-15	0.6065	0.881955		1.41363e-15	0.909009	0.94728
OTU729	2.55351e-15	0.434613	0.856796		2.01113e-16	0.69435	0.913775
OTU384	3.61933e-13	0.223205	0.765274		1.85303e-10	0.163985	0.875325
OTU1028	9.67004e-14	0.57491	0.881955		2.83904e-14	0.305878	0.875325
OTU234	2.68573e-09	0.189473	0.765274		4.71096e-11	0.236764	0.875325
OTU730	3.8817e-05	1	1		1.80063e-08	0.0115916	0.0927326
OTU85	2.55351e-15	0.399095	0.856796		4.16774e-16	0.450455	0.875325
OTU48	0.0351046	0.717429	0.881955		0.853128	0.881906	0.94728
OTU19	0.515081	0.575558	0.881955		0.384176	0.27392	0.875325
OTU1041	9.99201e-16	0.479536	0.863164		4.79039e-15	0.310893	0.875325
OTU525	3.0343e-10	0.738151	0.881955		8.12183e-12	0.297556	0.875325
OTU718	4.50749e-05	0.206393	0.765274		0.000458949	0.199704	0.875325
OTU1069	5.25802e-13	0.543819	0.881955		3.8768e-15	0.489267	0.875325
OTU870	1.11022e-16	0.402474	0.856796		7.54607e-16	0.920967	0.94728
OTU288	1.48548e-13	0.596057	0.881955		3.16931e-13	0.568993	0.875325
OTU444	0.00173816	0.256211	0.802051		0.26229	0.662883	0.913775
OTU84	1.59539e-13	0.366766	0.856796		4.26109e-13	0.305006	0.875325
OTU714	0.00132341	0.677194	0.881955		0.275397	0.812968	0.944092
OTU325	5.73985e-14	0.597288	0.881955		7.42945e-17	0.416238	0.875325
OTU51	0.00867623	0.123168	0.633433		1.77167e-05	0.595707	0.875325
OTU1105	7.61358e-08	0.362476	0.856796		0.700384	0.622928	0.881245
OTU734	2.63408e-11	0.000349942	0.0222714		4.90101e-09	0.00335083	0.0733711
OTU728	5.52228e-07	0.00317685	0.0322293		1.03221e-07	0.00430052	0.0733711
OTU731	5.92285e-07	0.00218969	0.0315315		4.7158e-06	0.00815235	0.0733711
OTU78	1.11022e-16	0.68615	0.881955		1.17405e-10	0.340112	0.875325
OTU228	5.55112e-15	0.191629	0.765274		2.10462e-11	0.176498	0.875325
OTU401	4.02959e-08	0.00140263	0.0252474		1.9846e-07	0.00442862	0.0733711
OTU724	0.332051	0.908658	0.948165		0.434326	0.91112	0.94728
OTU1184	3.66121e-05	0.747212	0.881955		0.0789008	0.588092	0.875325
OTU1113	7.88258e-15	0.867399	0.940489		4.10657e-15	0.856363	0.94728
OTU125	5.88418e-15	0.619153	0.881955		3.80862e-15	0.571823	0.875325
OTU1021	1.19904e-14	0.641866	0.881955		8.2841e-12	0.260799	0.875325
OTU274	1.60982e-14	0.450909	0.856796		3.69542e-13	0.586434	0.875325
OTU802	6.43929e-15	0.323103	0.856796		2.48745e-13	0.548424	0.875325
OTU752	2.83735e-08	0.00345438	0.0322293		8.77889e-10	0.00628484	0.0733711
OTU862	1.13251e-05	0.0847457	0.469361		3.1369e-08	0.10268	0.672086
OTU533	1.19116e-12	0.431955	0.856796		1.12634e-13	0.310185	0.875325
OTU789	0.0928715	0.780826	0.906766		0.00240192	0.768328	0.944092
OTU743	1.84542e-08	0.00061865	0.0222714		1.26659e-09	0.00800091	0.0733711
OTU86	3.1608e-12	0.737052	0.881955		8.97015e-14	0.379102	0.875325
OTU692	0.019471	0.208195	0.765274		0.865386	0.762618	0.944092
OTU885	0	0.88824	0.940489		6.16768e-18	0.6961	0.913775
OTU122	6.52543e-10	0.0696986	0.418192		6.32339e-12	0.168812	0.875325
OTU698	3.77541e-07	0.411134	0.856796		0.123212	0.53708	0.875325
OTU34	4.47753e-13	0.476505	0.863164		3.30088e-13	0.34667	0.875325
OTU769	0.0967356	0.652358	0.881955		0.0779825	0.710714	0.913775
OTU89	1.32511e-05	0.00122914	0.0252474		3.04482e-07	0.00403763	0.0733711
OTU889	1.22125e-15	0.981407	0.99523		4.13151e-16	0.951631	0.965034
OTU261	1.78857e-13	0.00358103	0.0322293		1.45404e-14	0.624215	0.881245
OTU29	1.83264e-05	0.411045	0.856796		9.73896e-09	0.44412	0.875325
OTU82	3.44169e-15	0.19664	0.765274		1.70918e-15	0.481158	0.875325
OTU774	4.26359e-09	0.00814885	0.0651908		4.10717e-06	0.0150752	0.108541
OTU37	2.05724e-12	0.531945	0.881955		1.72864e-11	0.26417	0.875325
OTU999	1.11022e-15	0.6703	0.881955		2.48595e-17	0.554472	0.875325
OTU810	1.11022e-15	0.73555	0.881955		1.03891e-16	0.709034	0.913775
OTU707	0.129509	0.410279	0.856796		0.0572772	0.555828	0.875325
OTU1001	2.36478e-14	0.860984	0.940489		5.30072e-15	0.531094	0.875325
OTU795	4.88498e-15	0.452198	0.856796		1.92071e-13	0.444717	0.875325
OTU427	1.68532e-12	0.0654405	0.418192		9.66028e-15	0.522781	0.875325
OTU869	0.360543	0.53496	0.881955		0.0832355	0.48791	0.875325

## Sheet: filtered_matrix1_CTLvsNEC
	OTU317	OTU57	OTU30	OTU738	OTU736	OTU128	OTU322	OTU25	OTU861	OTU1243	OTU1026	OTU46	OTU729	OTU384	OTU1028	OTU234	OTU730	OTU85	OTU48	OTU19	OTU1041	OTU525	OTU718	OTU1069	OTU870	OTU288	OTU444	OTU84	OTU714	OTU108	OTU325	OTU51	OTU1105	OTU734	OTU728	OTU731	OTU78	OTU228	OTU401	OTU724	OTU1184	OTU1113	OTU125	OTU1021	OTU274	OTU802	OTU752	OTU862	OTU533
control1-early disease	0	0	0.000321497	0	0	0	0	0.00339358	7.14439e-05	7.14439e-05	0	0	3.57219e-05	0	0	7.14439e-05	3.57219e-05	0	0	3.57219e-05	0	0	0	7.14439e-05	0	3.57219e-05	0	0	3.57219e-05	0	0.000107166	0.000321497	0	0	3.57219e-05	0	0	0	0.000107166	3.57219e-05	0	3.57219e-05	3.57219e-05	0	0	0	7.14439e-05	0.0980567	0
control1-early post partum	0.00150032	0.00101808	0.177717	0.000321497	0.0107702	0.00428663	0.0007323	0.000446524	0.00142888	0.00101808	0.0091984	0.00955562	0.00810888	0.00017861	0.00126813	0.0229692	0.0116811	0.00196471	0.00275059	0.000142888	0.00169679	0.000607273	0.0032507	0.042777	0.00142888	0.0014646	0.000142888	0.000964492	0.00728728	0.000303636	0.055119	0.000357219	0.00117882	0.00721583	0.0127885	0.0109488	0.000107166	0.000267915	0.125848	0.00232193	7.14439e-05	0.00151818	0.00262556	0.000250054	0.0007323	0.000839466	0.0241123	0.00834107	0.00182182
control1-early pre-onset	0.000714439	0.000517968	0.0890369	0.000125027	0.00605487	0.00189326	0.00055369	0.000267915	0.494892	3.57219e-05	0.00539401	0.00532257	0.0036615	0.000214332	0.00055369	0.015164	0.00685861	0.00116096	0.000982353	5.35829e-05	0.00100021	0.000232193	0.000678717	0.0221655	0.000768022	0.000625134	0.00275059	0.000642995	0.00434022	0.00017861	0.0271487	5.35829e-05	0.000946631	0.00380439	0.00650139	0.00739444	8.93049e-05	0.000160749	0.0688183	0.00148246	8.93049e-05	0.000607273	0.00151818	0.000428663	0.000392941	0.000482246	0.011181	0.00175038	0.000750161
control1-late pre-onset	0	0	5.35829e-05	0	0	0	0	7.14439e-05	0.366739	0	0	0	1.7861e-05	0	0	1.7861e-05	0	0	7.14439e-05	0	0	1.7861e-05	0	0	0	0	0.0139851	0	0	0	1.7861e-05	0.000214332	0	0	0	0	0	0	5.35829e-05	1.7861e-05	1.7861e-05	0	0	0	0	0	7.14439e-05	0.0568157	0
control10-early disease	0	0	0.000714439	0	0	0	0	0.000321497	3.57219e-05	3.57219e-05	0	0	3.57219e-05	0	0	0	0	0	0.00307209	0.0022862	0	0	0.193899	0.000285776	0	0	0	0	0.115203	0	0.00017861	0.00328642	0.000250054	0	0	0	0	0	0	0.00864471	0	0	3.57219e-05	0	0	0	0	0.0114667	0
control10-early post partum	0.00139316	0.00125027	0.143638	0	0	0.00357219	0.000857327	3.57219e-05	3.57219e-05	0	0.0163964	0.0102879	0.00367936	0.00157177	0.00350075	0.000392941	0	0.000571551	0.0132886	0	0.00278631	0.00282203	0.000107166	0.0150032	0.00153604	0.00117882	0	0.00271487	0.00100021	3.57219e-05	0.0186111	0.000107166	0.00103594	3.57219e-05	0	0	0.0011431	0.00121455	0.00017861	0.582303	0	0.00092877	0.00425091	0.00242909	0.00128599	0.00189326	0.000107166	3.57219e-05	0.00378653
control10-early pre-onset	0	7.14439e-05	0.00250054	0	0	3.57219e-05	0	0.210188	0.00185754	0	0.000500107	0.000357219	0.000142888	7.14439e-05	3.57219e-05	3.57219e-05	0	0	0.0183968	0.0125384	3.57219e-05	0	3.57219e-05	0.000285776	3.57219e-05	0	0.000714439	0.000142888	7.14439e-05	0	0.000607273	0	3.57219e-05	0	0	0	3.57219e-05	3.57219e-05	0	0.730192	0.000142888	7.14439e-05	7.14439e-05	3.57219e-05	0	0	0	7.14439e-05	3.57219e-05
control10-late pre-onset	0	0	0.000642995	0	0	0	0	0.00132171	0.00017861	0	3.57219e-05	0	3.57219e-05	3.57219e-05	0	0	0	0	0.00778738	0.00200043	3.57219e-05	0	0.260056	3.57219e-05	0	0	0.000142888	0	0.0705151	0	7.14439e-05	0.00771594	0.00492963	0	0	0	0	0	0	0.349718	3.57219e-05	0	0	0	0	0	0	0.00150032	0
control11-early disease	0.000107166	0	0.000321497	0	0	0	0	0.00250054	0	7.14439e-05	3.57219e-05	3.57219e-05	0	0	0	0	0	0	0.0120026	0.000750161	0	0	0.000321497	0	0	0	0	0	0	0	7.14439e-05	0.00342931	0	0	0	0	0	0	0	0.0312567	0	3.57219e-05	3.57219e-05	0	0	0	0	0.0362578	0
control11-early post partum	0.00378653	0.00267915	0.259699	0	0	0.00539401	0.00128599	0.240659	0.00017861	0	0.0344717	0.017861	0.00653712	0.00300064	0.00364364	0.000642995	0	0.000500107	0.000392941	0	0.00482246	0.00335786	3.57219e-05	0.0286847	0.00289348	0.0014646	0	0.00592984	0.0011431	0.000142888	0.0377938	0.000142888	0.000857327	3.57219e-05	7.14439e-05	0	0.00117882	0.00221476	0.000285776	0.000607273	0	0.00217904	0.0078231	0.00389369	0.00214332	0.00335786	3.57219e-05	3.57219e-05	0.00646567
control11-early pre-onset	0	3.57219e-05	0.00103594	0	0	3.57219e-05	0	0.0422948	0	7.14439e-05	0.000107166	0	0	3.57219e-05	3.57219e-05	0	0	0	0.0047153	0	3.57219e-05	0	3.57219e-05	0.000107166	0	0	0	0	3.57219e-05	0	0.000142888	0.000642995	0	0	0	0	0	0	0	7.14439e-05	0	0	0	3.57219e-05	0	3.57219e-05	0	0.0735158	0
control11-late pre-onset	0	0	0.000214332	0	0	0	3.57219e-05	0.000250054	0	0.000107166	0	0	0	0	0	0	0	0	0.0356505	0	3.57219e-05	0	3.57219e-05	0	0	0	0	0	0	0	3.57219e-05	0.000750161	0.000107166	0	0	0	0	0	0	0.000214332	0	0	0	0	0	0	0	0.0808745	0
control12-early disease	0	3.57219e-05	0.000750161	0.000107166	0	3.57219e-05	0	0.0129671	0	0	0	3.57219e-05	0	0	3.57219e-05	0.000214332	0	0	0.00507252	0.00657284	0	0	0.0729085	0.00017861	0	3.57219e-05	0	0	0.000321497	0	0.000250054	0.000142888	0	0	0	0	0	0	0	0.0194327	0	0	0	0	0	0	7.14439e-05	0.0147532	3.57219e-05
control12-early post partum	0.00128599	0.00214332	0.333107	0	0.0014646	0.00843038	0.00250054	7.14439e-05	0.000678717	0.000142888	0.0214689	0.0139316	0.0123598	0.00132171	0.00539401	0.0561192	0.00335786	0.00389369	0.000357219	0	0.00482246	0.00210759	0.00017861	0.085947	0.00217904	0.00225048	7.14439e-05	0.0026077	0.0108237	0.00092877	0.0864114	3.57219e-05	0.00217904	0.000785883	0.0014646	3.57219e-05	0.000750161	0.00142888	0.00625134	0.00107166	7.14439e-05	0.00167893	0.00810888	0.00132171	0.00160749	0.00142888	0.00685861	0.000821605	0.00725155
control12-early pre-onset	0.000125027	0.000250054	0.0483854	0.000125027	0.000250054	0.00126813	0.000285776	0.275684	0.0112703	8.93049e-05	0.00310781	0.00160749	0.00169679	0.00017861	0.000642995	0.00871615	0.000446524	0.000392941	0.00139316	0.0150747	0.00092877	0.000107166	0.00221476	0.0100557	0.00037508	0.000339358	0.000250054	0.000250054	0.00555476	0.00017861	0.0134136	0.000196471	0.000267915	0.000142888	0.000214332	1.7861e-05	0.000214332	0.000214332	0.000821605	0.000517968	1.7861e-05	0.000500107	0.00117882	0.000142888	8.93049e-05	0.000250054	0.00100021	0.0504572	0.000803744
control12-late pre-onset	0	0	0.00121455	0.00175038	0	0	0	0.00378653	0	0	0	3.57219e-05	7.14439e-05	0	0	0.00017861	0	0	0.0217547	0.000464385	0	0	0.0430449	0.000321497	0	0	0	0	0	0	0.000142888	0.000500107	0	0	0	0	0	0	0	0.0108952	0	0	0	0	0	0	0	0.065907	0
control13-early disease	0	0	0.000464385	0	0	3.57219e-05	0	0.00017861	3.57219e-05	0	3.57219e-05	3.57219e-05	3.57219e-05	3.57219e-05	0	0.000142888	3.57219e-05	3.57219e-05	0.357469	0.00353647	7.14439e-05	0	0.0704079	7.14439e-05	3.57219e-05	3.57219e-05	0	0	0.000357219	0	0.000214332	7.14439e-05	0	0	0	0	0	0	0	0.0170394	0	0	0	0	0	0	0	0.0405801	0
control13-early post partum	5.35829e-05	7.14439e-05	0.0256662	5.35829e-05	0.000107166	0.000410802	0.000142888	0.000875188	0.388101	8.93049e-05	0.00103594	0.000642995	0.000696578	8.93049e-05	0.000428663	0.00189326	0.000107166	0.000250054	1.7861e-05	0	0.000446524	8.93049e-05	1.7861e-05	0.00496535	5.35829e-05	0.000160749	0.0791955	0.000125027	0.000839466	0.00037508	0.00491177	7.14439e-05	7.14439e-05	5.35829e-05	7.14439e-05	0	7.14439e-05	0.000107166	0.000285776	5.35829e-05	0.140423	0.000107166	0.00055369	3.57219e-05	1.7861e-05	5.35829e-05	0.000446524	8.93049e-05	0.000446524
control13-early pre-onset	0.000196471	1.7861e-05	0.0229692	3.57219e-05	7.14439e-05	0.000303636	5.35829e-05	0.128313	0.0798385	5.35829e-05	0.0010538	0.000857327	0.000946631	0.00017861	0.000464385	0.0037508	0.000321497	0.000160749	0.00262556	0.000428663	0.000392941	0.00017861	7.14439e-05	0.00442952	0.000232193	8.93049e-05	0.0144495	8.93049e-05	0.0114489	0.000250054	0.00676931	0.000160749	0.167018	3.57219e-05	0.000107166	0	3.57219e-05	5.35829e-05	0.000392941	8.93049e-05	5.35829e-05	3.57219e-05	0.000642995	0.000107166	3.57219e-05	8.93049e-05	0.000500107	0.0512253	0.000303636
control13-late pre-onset	0	3.57219e-05	0.000571551	0	0	0	3.57219e-05	0.0118597	7.14439e-05	0	0	0	0	0	3.57219e-05	3.57219e-05	0	0	0.118811	0.00257198	0	0	0.0292205	3.57219e-05	0	3.57219e-05	0	0	7.14439e-05	0	0.000214332	0.000464385	0	0	0	0	3.57219e-05	0	0	0.0419733	0	0	0	0	0	0	3.57219e-05	0.0749446	0
control14-early disease	0	0	0.000857327	0	0	0	3.57219e-05	0.000142888	3.57219e-05	0.0497607	0	3.57219e-05	3.57219e-05	0	0	0	0	0	0.000214332	0.000571551	3.57219e-05	0	0.068479	3.57219e-05	0	0	0	3.57219e-05	0.00957348	0	0.00017861	0.010538	0	0	0	0	0	0	0	0.0164678	0	0	0	0	0	0	0	0.00310781	3.57219e-05
control14-early post partum	0.00446524	0.00339358	0.294385	0	7.14439e-05	0.00650139	0.00189326	0.000142888	3.57219e-05	7.14439e-05	0.0402229	0.0250054	0.00925198	0.00542973	0.00503679	0.00110738	0	0.00182182	0.000250054	0	0.00689433	0.0052154	7.14439e-05	0.0876259	0.00417947	0.00221476	0	0.00793027	0.00207187	7.14439e-05	0.0480817	0.000285776	0.00217904	0.000107166	0	0	0.00460813	0.0032507	0.000214332	0.000535829	0	0.00214332	0.0112881	0.00682289	0.00450096	0.00425091	0.000285776	0.000250054	0.00839466
control14-early pre-onset	3.57219e-05	0	0.00250054	0	0	3.57219e-05	7.14439e-05	0.0183254	0.000142888	0	0.000392941	0.000285776	0	0	3.57219e-05	0	0	0	0.0119311	0.0224334	0	3.57219e-05	0	0.000392941	0	0	0	7.14439e-05	0.000571551	0	0.000357219	0	3.57219e-05	0	0	0	3.57219e-05	0	0	0.937487	3.57219e-05	0	0.00017861	0.000107166	0	3.57219e-05	0	3.57219e-05	0.000107166
control14-late pre-onset	0	0	0.000214332	0	0	3.57219e-05	0	0	3.57219e-05	0.0278988	3.57219e-05	0	3.57219e-05	0	0	0	0	0	3.57219e-05	0.000214332	0	3.57219e-05	0.0103236	3.57219e-05	0	0	0	0	0.00482246	0	0	0.00592984	3.57219e-05	0	0	0	0	3.57219e-05	0	0.00596556	0	0	0	0	0	0	0	0.0138958	3.57219e-05
control15-early disease	0	0	0.000238146	0	0	1.19073e-05	0	0.00681098	5.95366e-05	1.19073e-05	0	0	0	0	0	4.76293e-05	0	0	0.162166	0.00222667	0	1.19073e-05	0	7.14439e-05	0	0	1.19073e-05	0	7.14439e-05	0	8.33512e-05	0.000321497	0	0	1.19073e-05	2.38146e-05	0	0	0.00017861	0.000214332	0	0	0	0	0	0	4.76293e-05	0.0765283	0
control15-early post partum	0.0037508	0.00289348	0.340644	0	0	0.00642995	0.00310781	0	0.000214332	3.57219e-05	0.0411874	0.0248267	0.0107523	0.00557262	0.00542973	0.00189326	0	0.00221476	0.000535829	0	0.00696578	0.00589412	7.14439e-05	0.0316854	0.00332214	0.00603701	0	0.00743016	0.00221476	3.57219e-05	0.0450811	0.000142888	0.00250054	0.000142888	3.57219e-05	0.000428663	0.00482246	0.00300064	0.000357219	0.000464385	0.000107166	0.00221476	0.0099307	0.00546546	0.00400086	0.00425091	0.000428663	0.00171465	0.0145388
control15-early pre-onset	0.00110738	0.000750161	0.089412	0	0	0.00150032	0.000821605	0.182075	3.57219e-05	0	0.011181	0.007323	0.00342931	0.00139316	0.00135743	0.000714439	0	0.000642995	0.000107166	0.00200043	0.00200043	0.0017861	0.00017861	0.0103951	0.00107166	0.000750161	0	0.00264342	0.000607273	0	0.0128956	0.000392941	0.000893049	3.57219e-05	0	0	0.0011431	0.000964492	3.57219e-05	0.000107166	0.000464385	0.000821605	0.0029292	0.00203615	0.00121455	0.00135743	0.000107166	0.0382225	0.00200043
control15-late pre-onset	0	0	3.57219e-05	0	0	0	0	0.00896621	0	0	0	0	0	0	0	0	0	0	0	0.00017861	0	0	0	0	0	0	0	0	0	0	7.14439e-05	0.000500107	0	0	0	0	0	0	0	0	0	0	0	0	0	0	0	0.0701936	0
control16-early disease	0	0	8.93049e-05	0.000303636	0	0	0	0.000250054	0.000142888	0.0054476	0	0	0	0	0	0	1.7861e-05	0	0.0429914	0.00278631	0	0	0.0743374	3.57219e-05	0	0	5.35829e-05	0	0.00153604	0	3.57219e-05	0.000964492	0	0	0	0	0	0	3.57219e-05	0.00153604	0	0	0	1.7861e-05	0	0	0	0.000982353	0
control16-early post partum	0.00185754	0.00101808	0.182593	0.00135743	0.0121633	0.00455455	0.00151818	0.000571551	0.00210759	7.14439e-05	0.0104665	0.0106809	0.00839466	0.000267915	0.00130385	0.0312746	0.0125384	0.0025184	0.00671572	3.57219e-05	0.00194685	0.000803744	0.000303636	0.0412946	0.0014646	0.00116096	0.00017861	0.00162535	0.00826963	0.000946631	0.0551904	0.000142888	0.00289348	0.00712653	0.0136994	0.0135029	0.000410802	0.000250054	0.136654	0.00107166	0.000196471	0.00132171	0.00337572	0.000464385	0.000607273	0.000803744	0.0244338	0.00507252	0.00246481
control16-early pre-onset	0.000446524	0.000267915	0.0517254	0.000589412	0.00305423	0.00119669	0.000696578	0.000250054	0.00169679	0.0373473	0.00287562	0.00303636	0.00266128	0.000125027	0.000642995	0.00909123	0.0040723	0.0007323	0.000303636	3.57219e-05	0.000357219	0.000107166	0.0629421	0.012717	0.000410802	0.000321497	5.35829e-05	0.000339358	0.00696578	0.000267915	0.0165393	0.00760877	0.000428663	0.00216118	0.00403658	0.00342931	0.000125027	0.000125027	0.0357398	0.00055369	1.7861e-05	0.000535829	0.0010538	0.000142888	0.000107166	0.000214332	0.00721583	0.038151	0.000696578
control16-late pre-onset	0	0	0.000714439	0	0	1.7861e-05	1.7861e-05	0.000285776	0.00560834	0.0372401	5.35829e-05	1.7861e-05	1.7861e-05	0	0	0	0	0	0.0392584	0.000857327	1.7861e-05	0	0.137726	0.000107166	0	0	0.000303636	0	7.14439e-05	0	0.000232193	0.00734086	0	0	0	0	0	0	5.35829e-05	0.00125027	7.14439e-05	0	0	0	0	0	1.7861e-05	0.00453669	1.7861e-05
control17-early disease	3.57219e-05	0	0.000678717	0	0	3.57219e-05	0	0.00017861	3.57219e-05	0	3.57219e-05	0	0.000107166	0	7.14439e-05	0	0	0	0.0221476	0.000142888	0	0	0.274952	3.57219e-05	0	0	0	3.57219e-05	0.133779	0	0.00017861	0.0294706	0	0	0	0	0	0	0	0.0465457	0	0	0	0	0	0	0	0.0204687	3.57219e-05
control17-early post partum	0.00478674	0.00342931	0.375116	0	0	0.00400086	0.00275059	0.00250054	0.000893049	0	0.0375795	0.0231121	0.0099307	0.00592984	0.00289348	0.00200043	0	0.00189326	0.00017861	0.00171465	0.00775166	0.00660856	3.57219e-05	0.01311	0.00300064	0.00425091	0.000214332	0.00650139	0.00214332	3.57219e-05	0.0474745	3.57219e-05	0.0026077	3.57219e-05	0	0	0.00410802	0.00328642	0.000357219	0.000250054	0	0.00235765	0.0101093	0.00621562	0.00207187	0.00453669	0.000107166	0.000357219	0.00907337
control17-early pre-onset	3.57219e-05	0	0.00400086	0	0	0	0	0.098021	7.14439e-05	0	0.000607273	0.000321497	0	3.57219e-05	0	0	0	0	0.0834107	0.0078231	0	0.000107166	0	0.000107166	7.14439e-05	0	0	0.000214332	0.000464385	0	0.000535829	0	0	0	0	0	3.57219e-05	0	0	0.760663	0	0	3.57219e-05	7.14439e-05	0	0.000107166	0	0	0.000107166
control17-late pre-onset	0	0	0.000714439	0	0	3.57219e-05	0	0.00718011	0.0288633	0	7.14439e-05	3.57219e-05	7.14439e-05	0	3.57219e-05	0	0	0	0.188612	0.000642995	0	0	0	0	0	0	0.00757305	0	0.289026	0	3.57219e-05	0	0	0	0	0	0	0	0	0.378581	0	0	3.57219e-05	0	0	7.14439e-05	0	3.57219e-05	3.57219e-05
control2-early disease	0.000107166	0.000250054	0.00803744	0	0	0.000357219	0.000107166	0.00428663	7.14439e-05	7.14439e-05	0.00139316	0.000642995	0.000392941	0.000107166	0.00017861	3.57219e-05	0	7.14439e-05	0	0	0.000107166	0.000285776	0	0.00160749	0.000142888	0.000142888	0	0.000392941	7.14439e-05	0	0.00139316	0.000428663	3.57219e-05	0	0	0	0.00017861	3.57219e-05	3.57219e-05	0.000107166	3.57219e-05	7.14439e-05	0.000321497	0.000214332	0.000250054	7.14439e-05	0	0.0729085	0.000357219
control2-early post partum	0.00421519	0.00296492	0.368936	0	0	0.00425091	0.00239337	7.14439e-05	0.000357219	3.57219e-05	0.0421162	0.0255412	0.0100736	0.00464385	0.00246481	0.00310781	3.57219e-05	0.00271487	0.000285776	0	0.00753733	0.00607273	3.57219e-05	0.0193256	0.0032507	0.00492963	3.57219e-05	0.00889476	0.00242909	0.000107166	0.0475102	7.14439e-05	0.00214332	7.14439e-05	0.000107166	0.000107166	0.00746589	0.00346503	0.000142888	0.000714439	7.14439e-05	0.00264342	0.0109666	0.00614417	0.00282203	0.00421519	7.14439e-05	0	0.00985926
control2-early pre-onset	0.00339358	0.00264342	0.264664	3.57219e-05	3.57219e-05	0.00253626	0.00196471	0.230907	0.000321497	3.57219e-05	0.0335786	0.0203972	0.00839466	0.00353647	0.00160749	0.00207187	0	0.00142888	0.000392941	0	0.00596556	0.00500107	0	0.031471	0.00253626	0.00210759	0	0.00539401	0.00121455	7.14439e-05	0.0335072	7.14439e-05	0.00242909	0	7.14439e-05	0	0.00657284	0.00210759	0.00017861	7.14439e-05	0.000500107	0.00246481	0.00807316	0.00475102	0.00132171	0.00303636	0.00017861	3.57219e-05	0.00760877
control2-late pre-onset	0.00185754	0.0032507	0.301172	0	3.57219e-05	0.00364364	0.00192898	0.178145	0.0011431	3.57219e-05	0.032507	0.0212903	0.00857327	0.00332214	0.00235765	0.000893049	0	0.000464385	0.000107166	0	0.00546546	0.00517968	0	0.0541187	0.00200043	0.00457241	0.000142888	0.00400086	0.00160749	0.000250054	0.0367222	0	0.000500107	0.00017861	7.14439e-05	0	0.00150032	0.00250054	0.000214332	0.000142888	0.000107166	0.00192898	0.00871615	0.00321497	0.00285776	0.00332214	0.000285776	0.000107166	0.00843038
control3-early disease	0	0	0.00017861	0.000357219	0	0	0	0.0166107	0.000321497	0	0	0	0	0	0	3.57219e-05	0	0	0.0120383	0	0	0	0.000214332	0	0	0	0	0	0	0	7.14439e-05	3.57219e-05	0.654712	0	0	0	0	0	0	0.000250054	0	0	0	0	0	0	0	0.000357219	0
control3-early post partum	0.00264342	0.00100021	0.251572	0.000339358	0.00566193	0.0052154	0.00180396	0.000196471	0.00100021	0.000500107	0.0122526	0.0101629	0.0102522	0.000714439	0.00446524	0.0384904	0.00743016	0.00257198	0.00189326	0.000107166	0.00376866	0.00092877	0.000571551	0.0643352	0.00110738	0.00169679	7.14439e-05	0.00132171	0.00796599	0.00225048	0.0589233	0.000750161	0.0014646	0.00339358	0.00616203	0.00734086	0.000607273	0.000893049	0.0631743	0.00417947	0.000125027	0.000785883	0.0059477	0.00133957	0.00164321	0.00119669	0.0133243	0.00514396	0.00332214
control3-early pre-onset	0.00428663	0.000410802	0.161945	0.000142888	0.0132171	0.00482246	0.00092877	0.00108952	0.00396514	8.93049e-05	0.00809102	0.00707294	0.00714439	0.000196471	0.00141102	0.0461885	0.0129135	0.00207187	0.00183968	0.000107166	0.00164321	0.000500107	0.00200043	0.0398121	0.00100021	0.00125027	0.000446524	0.00117882	0.00803744	0.00117882	0.0502072	3.57219e-05	0.012717	0.00671572	0.0151818	0.0175395	0.000267915	8.93049e-05	0.120311	0.00232193	0.000160749	0.00103594	0.0029292	0.00144674	0.000535829	0.000642995	0.020808	0.00509038	0.00158963
control3-late pre-onset	0	0	0.000500107	3.57219e-05	0	0	0	0.0350432	0.0260056	0	0	0	3.57219e-05	0	0	0.000107166	0.000142888	0	0.000142888	0	0	0	0	7.14439e-05	3.57219e-05	7.14439e-05	0.0070015	0	3.57219e-05	0	0.000392941	0	0.918733	3.57219e-05	3.57219e-05	7.14439e-05	0	0	0.00092877	0	0	3.57219e-05	0	0	0	0	0.000214332	0.000714439	0
control4-early disease	1.7861e-05	0	0.0022862	0.0629242	3.57219e-05	8.93049e-05	1.7861e-05	1.7861e-05	0	0.0511002	0.000142888	0.000125027	0.000107166	0	1.7861e-05	0.000392941	1.7861e-05	0	0.00944845	0	3.57219e-05	0	0.000232193	0.000589412	0	7.14439e-05	0	3.57219e-05	3.57219e-05	1.7861e-05	0.000875188	0.00825177	0	1.7861e-05	3.57219e-05	0	0	0	0	0.000214332	0	1.7861e-05	7.14439e-05	1.7861e-05	0	1.7861e-05	5.35829e-05	0.0139673	5.35829e-05
control4-early post partum	0.00303636	0.0011431	0.28724	0.00135743	0.00203615	0.00510824	0.00128599	0.000107166	0.00978781	0	0.0137529	0.00907337	0.0176109	0.000714439	0.00396514	0.103415	0.00507252	0.00232193	0.000321497	0	0.00475102	0.00132171	0.000107166	0.062049	0.00171465	0.00232193	0.00100021	0.00464385	0.0185754	0.0017861	0.0790884	0	0.000964492	0.00217904	0.00414375	0.000142888	0.000750161	0.00210759	0.0139316	0.00346503	0.00100021	0.000714439	0.00678717	0.00271487	0.00107166	0.00107166	0.00996642	0.00121455	0.00250054
control4-early pre-onset	8.93049e-05	7.14439e-05	0.0393299	5.35829e-05	5.35829e-05	0.000714439	0.000107166	3.57219e-05	0.394174	8.93049e-05	0.00176824	0.000714439	0.00119669	0.000107166	0.000410802	0.0014646	0.000214332	0.000125027	5.35829e-05	0	0.000517968	0.000125027	0.00169679	0.00753733	5.35829e-05	0.000339358	0.0120026	0.000160749	0.00107166	1.7861e-05	0.00980567	0.000125027	5.35829e-05	7.14439e-05	0.000142888	0	3.57219e-05	5.35829e-05	0.000571551	0.00107166	0.00334	0.000107166	0.0007323	8.93049e-05	0.000232193	8.93049e-05	0.00107166	0.0461885	0.000285776
control4-late pre-onset	0	0	3.57219e-05	0.0971994	0	0	0	0.00378653	0	0.00167893	0	0	0	0	0	3.57219e-05	0	0	0.000250054	0	0	0	0.000107166	0	0	0	0	0	0	0	7.14439e-05	0.000535829	0	0	0	0	0	0	0	0	0	0	0	0	0	0	0	0.0823391	0
control5-early disease	0	0	0.00117882	0.0796956	0	0	3.57219e-05	0.000500107	0.000642995	0.000214332	0.000107166	0	0	0	3.57219e-05	0.000250054	3.57219e-05	0	0.000785883	0	0	0	0	0.000321497	0	3.57219e-05	0	0	0	3.57219e-05	0.000250054	0.000107166	0	0	0	0	0	3.57219e-05	3.57219e-05	3.57219e-05	7.14439e-05	0	0	0	3.57219e-05	0	3.57219e-05	0.0220047	0.000107166
control5-early post partum	0.00239337	0.00150032	0.188219	7.14439e-05	0.011824	0.00550118	0.00132171	0.000107166	0.000464385	0.00017861	0.0108237	0.00889476	0.00882332	0.000357219	0.00185754	0.0373651	0.0139316	0.00346503	0.00117882	3.57219e-05	0.00185754	0.000678717	0.0029292	0.0541545	0.00150032	0.00157177	0	0.00171465	0.00793027	0.000250054	0.0604058	7.14439e-05	0.00271487	0.00710867	0.0142888	0.0105737	0.000464385	0.000107166	0.140173	0.000571551	0.00017861	0.00157177	0.00421519	0.00103594	0.00132171	0.000857327	0.024791	0.00128599	0.00221476
control5-early pre-onset	0.00103594	0.000321497	0.107594	3.57219e-05	0.00592984	0.00257198	0.000768022	0.000571551	0.00269701	5.35829e-05	0.00566193	0.00430449	0.00469744	0.000142888	0.000910909	0.0160927	0.00651925	0.00141102	0.000857327	1.7861e-05	0.000964492	0.000196471	0.00200043	0.0262735	0.000714439	0.000785883	0.000428663	0.000464385	0.00357219	7.14439e-05	0.0326141	0	0.0197185	0.00355433	0.0061799	0.00564407	0.000214332	0.00017861	0.0646389	0.00112524	0.138047	0.000535829	0.00185754	0.000500107	0.000714439	0.00037508	0.0118597	0.000893049	0.00117882
control5-late pre-onset	0	3.57219e-05	0.00275059	0.271165	3.57219e-05	3.57219e-05	0	0.083125	0.0114667	0.000678717	7.14439e-05	3.57219e-05	0.000107166	0	3.57219e-05	0.000285776	3.57219e-05	7.14439e-05	0	3.57219e-05	7.14439e-05	3.57219e-05	0	0.000392941	0	3.57219e-05	0.00150032	0.000107166	0.000107166	0	0.000857327	0.00017861	7.14439e-05	0	0	0	3.57219e-05	0	3.57219e-05	0	7.14439e-05	7.14439e-05	0.000142888	0	0	0	3.57219e-05	0.0504037	0
control6-early disease	0	0	0.00110738	0.00346503	0	1.7861e-05	0	0.00162535	0	0.0424377	5.35829e-05	1.7861e-05	3.57219e-05	0	1.7861e-05	0.000107166	1.7861e-05	1.7861e-05	0.000750161	0.000160749	0	0	0.120829	0.000107166	0	0	0	3.57219e-05	7.14439e-05	0	0.000339358	0.00882332	0	1.7861e-05	1.7861e-05	0	0	0	1.7861e-05	0.0385976	0	1.7861e-05	1.7861e-05	0	0	1.7861e-05	1.7861e-05	0.0485818	5.35829e-05
control6-early post partum	0.00126813	0.00158963	0.326445	7.14439e-05	0.000982353	0.00871615	0.00294706	0.000107166	0.000482246	0	0.0190755	0.0136458	0.0122169	0.00153604	0.0052154	0.0421519	0.00337572	0.00294706	0.00526899	3.57219e-05	0.00582268	0.00182182	0.00141102	0.0781239	0.00225048	0.00221476	1.7861e-05	0.00237551	0.00935915	0.000714439	0.0863757	1.7861e-05	0.00151818	0.000875188	0.00121455	1.7861e-05	0.000660856	0.000910909	0.00605487	0.00148246	5.35829e-05	0.00150032	0.00832321	0.00137529	0.00153604	0.00157177	0.0061799	0.00133957	0.00714439
control6-early pre-onset	0.0014646	0.00180396	0.304905	0.000267915	0.00103594	0.00735872	0.00235765	8.93049e-05	0.0494213	1.7861e-05	0.0187004	0.0128242	0.0120919	0.00100021	0.00457241	0.0643531	0.00332214	0.00417947	0.00133957	3.57219e-05	0.00485818	0.00150032	0.000482246	0.0664607	0.00257198	0.00200043	0.000946631	0.00266128	0.0100021	0.00126813	0.0761235	3.57219e-05	0.00267915	0.00101808	0.00158963	1.7861e-05	0.00133957	0.000910909	0.00616203	0.000696578	0.000250054	0.00176824	0.00730514	0.00121455	0.000875188	0.00151818	0.00635851	0.00037508	0.00771594
control6-late pre-onset	0	0	0.0015539	0	0	5.35829e-05	1.7861e-05	0.0100557	0.24532	0	7.14439e-05	3.57219e-05	0.000107166	3.57219e-05	0	0.000321497	0	0	0.00321497	0	0.000107166	0	0.217243	0.000321497	1.7861e-05	0	0.00298278	0	7.14439e-05	0	0.000571551	0	0	0	0	0	1.7861e-05	1.7861e-05	3.57219e-05	0.492641	0	0	1.7861e-05	1.7861e-05	0	5.35829e-05	8.93049e-05	1.7861e-05	0
control7-early disease	1.7861e-05	0	0.00151818	0.0101808	0	1.7861e-05	1.7861e-05	0.00196471	0	0.0176109	3.57219e-05	3.57219e-05	8.93049e-05	0	3.57219e-05	0.000142888	0	1.7861e-05	0.000125027	0.00055369	0	0	0	0.000321497	1.7861e-05	0	0	0	3.57219e-05	0	0.000392941	0.00282203	1.7861e-05	0	0	0	0	0	7.14439e-05	0.0161999	0	0	0	0	1.7861e-05	0	1.7861e-05	0.0512431	0
control7-early post partum	0.00158963	0.00151818	0.349789	0.000285776	0.00121455	0.0087876	0.00183968	7.14439e-05	0.0015539	1.7861e-05	0.0235765	0.0133957	0.0128599	0.00116096	0.00560834	0.041491	0.00334	0.00269701	0.00100021	1.7861e-05	0.00598343	0.00126813	0.000428663	0.0847503	0.00233979	0.00223262	0.000285776	0.00246481	0.0107702	0.00128599	0.0903051	1.7861e-05	0.00141102	0.00100021	0.0014646	1.7861e-05	0.000803744	0.000803744	0.00657284	0.00130385	8.93049e-05	0.00221476	0.00891262	0.00121455	0.00166107	0.00151818	0.00632278	0.000607273	0.00514396
control7-early pre-onset	0.0007323	0.000910909	0.169018	1.7861e-05	0.000482246	0.00409016	0.000964492	0.230639	0.254894	0	0.0108416	0.00635851	0.00630492	0.000517968	0.00314353	0.0287383	0.00162535	0.00171465	0.00017861	0.00484032	0.00264342	0.000785883	0.00017861	0.0452061	0.00121455	0.00128599	0.00214332	0.00139316	0.00566193	0.000464385	0.0426877	0	0.00110738	0.000589412	0.000696578	0	0.000446524	0.000678717	0.00262556	0.000678717	3.57219e-05	0.00130385	0.00414375	0.000839466	0.000714439	0.000750161	0.00326856	0.000392941	0.00391155
control7-late pre-onset	0	1.7861e-05	0.00444738	0.105344	0	7.14439e-05	7.14439e-05	0.0944309	0.329463	0.000160749	0.000142888	0.000125027	8.93049e-05	0	3.57219e-05	0.000642995	1.7861e-05	1.7861e-05	0	0.0617811	3.57219e-05	3.57219e-05	0	0.00101808	1.7861e-05	3.57219e-05	0.00121455	0	0.000250054	1.7861e-05	0.000893049	0.000107166	0	0	5.35829e-05	0	1.7861e-05	0	0.000125027	0.00216118	5.35829e-05	1.7861e-05	8.93049e-05	1.7861e-05	1.7861e-05	5.35829e-05	0.000125027	0.0379188	0.000142888
control8-early disease	3.57219e-05	0	0.000321497	0	0	0	0	0.000571551	0	0.049332	3.57219e-05	0	3.57219e-05	3.57219e-05	0	0	0	0	0.0160034	0	0	0	0	0	0	0	0	0	0	0	0.00017861	0.0104665	0	0	0	0	0	0	0	7.14439e-05	0	0	0	0	7.14439e-05	0	0	0.0466171	0
control8-early post partum	0.00350075	0.00335786	0.31396	7.14439e-05	0	0.00925198	0.00250054	7.14439e-05	0.000214332	0	0.0384725	0.0235408	0.00953776	0.00503679	0.00900193	0.00257198	0	0.00214332	0.000678717	0	0.00778738	0.00592984	0.000142888	0.0599414	0.00450096	0.00310781	3.57219e-05	0.00657284	0.0026077	7.14439e-05	0.0457955	0.000142888	0.00328642	0.000321497	0	0	0.00385797	0.00339358	0.000321497	0.000678717	0.000285776	0.00253626	0.011431	0.00657284	0.00525113	0.00496535	0.000357219	0.000571551	0.0116454
control8-early pre-onset	0.00635851	0.00289348	0.32732	3.57219e-05	0	0.0078231	0.00235765	0	0.000107166	3.57219e-05	0.0351861	0.0257912	0.0112881	0.00532257	0.00818032	0.00221476	0	0.0017861	0.000285776	0	0.0058584	0.00746589	0	0.0325784	0.00328642	0.0061799	0	0.00821605	0.00185754	3.57219e-05	0.0494034	0.000250054	0.00403658	0	0	0	0.0043938	0.00307209	0.000285776	0.000428663	3.57219e-05	0.00339358	0.0103951	0.0096092	0.00478674	0.00546546	0.000428663	0.000500107	0.00903765
control8-late pre-onset	0	0	0.000428663	0	0	0	0	0.00135743	0	0.0234693	0	0	0	0	0	0	0	0	0	0	0	0	0	0	0	0	0	0	0	0	7.14439e-05	0.00596556	0	0	0	0	0	0	0	3.57219e-05	0	0	7.14439e-05	0	0	0	0	0.0546903	3.57219e-05
control9-early disease	0	0	0.000285776	0	0	0	0	0.00150032	7.14439e-05	7.14439e-05	0	0	0	0	0	0	0	0	0.00092877	0.000107166	3.57219e-05	0	3.57219e-05	3.57219e-05	0	0	0	0	0.000464385	0	7.14439e-05	0.0327213	0.000678717	0	0	0	0	0	0	0.0528327	3.57219e-05	0	0	3.57219e-05	0	0	0	0.000678717	0
control9-early post partum	0.000714439	0.000285776	0.0375438	0	0	0.000607273	0.000392941	0.000142888	0.00017861	0	0.0084661	0.0040723	0.000893049	0.000571551	0.000142888	0.000428663	0	7.14439e-05	0.865686	0	0.000785883	0.000714439	7.14439e-05	0.00321497	0.000678717	0.000142888	0	0.00125027	0.000142888	0	0.00535829	0.000107166	0.000357219	3.57219e-05	0	0	0.0011431	0.000392941	3.57219e-05	0.00117882	0	0.000535829	0.000785883	0.000964492	7.14439e-05	0.000285776	0	3.57219e-05	0.00150032
control9-early pre-onset	0.000107166	3.57219e-05	0.00989498	0	0	0.000321497	0	0.000142888	0.0768736	0	0.00142888	0.00100021	0.000142888	0.000107166	7.14439e-05	0.000107166	0	3.57219e-05	0.867757	0	0.000107166	0.000250054	3.57219e-05	0.000857327	0.00017861	7.14439e-05	0.0227906	0.000321497	0.000107166	0	0.00107166	0	0.000142888	0	0	0	0.00017861	7.14439e-05	0	0.00139316	0.000285776	3.57219e-05	0.00017861	0.00017861	3.57219e-05	0.00017861	0	3.57219e-05	0.000464385
control9-late pre-onset	0.00278631	0.00214332	0.225691	3.57219e-05	0	0.00353647	0.00167893	0.272666	0.000893049	0.000357219	0.030578	0.0167536	0.00503679	0.00285776	0.00160749	0.00153604	0	0.00132171	0.000464385	0.000285776	0.00428663	0.0040723	0.00392941	0.028899	0.00239337	0.00164321	0.000357219	0.00528685	0.00367936	0.00017861	0.0336143	0.000142888	0.00164321	7.14439e-05	3.57219e-05	0	0.00496535	0.00217904	0.000285776	0.00132171	0.00242909	0.00232193	0.00671572	0.00360792	0.000821605	0.00289348	0	0.000964492	0.00614417
NEC1-early disease	2.38146e-05	3.57219e-05	0.004239	0	4.76293e-05	9.52585e-05	3.57219e-05	0.0990569	8.33512e-05	0	0.000750161	0.000392941	0.000154795	1.19073e-05	3.57219e-05	0.000119073	3.57219e-05	1.19073e-05	0.567896	0	8.33512e-05	0.00013098	4.76293e-05	0.000964492	0.000119073	2.38146e-05	3.57219e-05	9.52585e-05	7.14439e-05	0	0.000821605	0.00017861	2.38146e-05	3.57219e-05	3.57219e-05	0.00013098	0.000154795	5.95366e-05	0.000440571	0.000440571	1.19073e-05	7.14439e-05	0.000190517	0.000142888	5.95366e-05	4.76293e-05	0.000357219	0.0283751	0.000261961
NEC1-early post partum	0.00460813	0.00296492	0.292277	0	0.000142888	0.00628706	0.00296492	0.00017861	0.000107166	3.57219e-05	0.0377581	0.0231835	0.00971637	0.00371508	0.00421519	0.00321497	3.57219e-05	0.00314353	0.000321497	0	0.00603701	0.00578695	0.000500107	0.0813746	0.00285776	0.00200043	0	0.007323	0.00196471	7.14439e-05	0.0473673	7.14439e-05	0.00489391	3.57219e-05	0.00017861	0	0.0084661	0.00382225	0.000285776	0.000642995	0.00017861	0.0017861	0.00996642	0.00753733	0.00382225	0.0037508	0.000214332	0.000500107	0.0145388
NEC1-early pre-onset	0	0	0.000214332	0	0	0	0	0.00693006	0	0	3.57219e-05	0	0	0	0	0	0	0	0.0283275	0	0	0	7.14439e-05	0.000107166	0	0	0	3.57219e-05	0	0	3.57219e-05	0.000321497	0	0	0	0	0	0	0	0.000107166	0	0	0	0	0	0	0	0.0796956	3.57219e-05
NEC1-late pre-onset	0	0	3.57219e-05	0	0	0	0	0.00264342	0.000857327	0	0	0	0	0	0	0	0	0	0.0335072	0	0	0	0	0	0	0	3.57219e-05	0	0	0	0	0.000357219	0	0	0	0	0	0	0	3.57219e-05	0	0	0	0	0	0	0	0.0907337	0
NEC2-early disease	7.14439e-05	0	0.00314353	3.57219e-05	0.000142888	7.14439e-05	3.57219e-05	0.973673	7.14439e-05	0	0.000250054	0.000357219	3.57219e-05	0	7.14439e-05	0.000321497	7.14439e-05	7.14439e-05	0	0	7.14439e-05	3.57219e-05	0	0.000571551	0	0	0	3.57219e-05	7.14439e-05	3.57219e-05	0.000857327	3.57219e-05	0	0.00017861	0.000392941	0.000285776	0	0	0.00285776	0	0	7.14439e-05	3.57219e-05	0	0	3.57219e-05	0.000535829	3.57219e-05	0.000107166
NEC2-early post partum	0.00092877	0.00125027	0.191541	7.14439e-05	0.00889476	0.0043938	0.00107166	0.000535829	0.000392941	3.57219e-05	0.0102522	0.00853754	0.00803744	0.000321497	0.00132171	0.0368293	0.0116454	0.00221476	0.00778738	0	0.00196471	0.000714439	0.000321497	0.0390441	0.000893049	0.0022862	0	0.00125027	0.00614417	0.000642995	0.0586197	3.57219e-05	0.00103594	0.00707294	0.0107523	0.00835893	0.000392941	0.000142888	0.109702	0.000357219	0.000357219	0.00196471	0.00285776	0.000321497	0.00135743	0.000642995	0.031471	0.00989498	0.00207187
NEC2-early pre-onset	0.00115501	0.0011431	0.248315	7.14439e-05	0.00848991	0.00639423	0.00171465	0.000107166	0.00092877	1.19073e-05	0.0147055	0.0133481	0.00860899	0.000833512	0.00332214	0.0360315	0.00952585	0.00275059	0.000869234	1.19073e-05	0.00315544	0.000869234	0.000107166	0.061918	0.00216713	0.00155986	5.95366e-05	0.00180991	0.00685861	0.00209569	0.060763	0.000523922	0.00135743	0.00604892	0.00893049	0.00858517	0.000440571	0.00079779	0.0898407	0.00136934	0.000250054	0.0017861	0.00408421	0.000702531	0.0013098	0.00126218	0.0190517	0.000452478	0.00351266
NEC2-late pre-onset	0.00092877	0.000464385	0.0889476	1.7861e-05	0.00657284	0.00233979	0.000267915	0.486444	0.000678717	3.57219e-05	0.00467957	0.00662642	0.00491177	0.000142888	0.000517968	0.015164	0.00757305	0.00112524	0.000857327	5.35829e-05	0.000660856	0.000714439	0.000232193	0.0225048	0.0010538	0.000517968	8.93049e-05	0.000875188	0.00339358	0.00264342	0.0289705	0.00128599	0.000642995	0.00337572	0.00798385	0.00893049	0.000321497	0.000232193	0.0703722	0.000196471	0.00037508	0.000607273	0.00198257	0.000250054	0.000446524	0.000660856	0.0119847	0.00244695	0.00055369
NEC3-early disease	1.7861e-05	0	0.000464385	1.7861e-05	7.14439e-05	1.7861e-05	0	0.0202543	0.458598	0.0482068	0	0	0	0	0	0	1.7861e-05	0	1.7861e-05	0.00139316	0	0	0	7.14439e-05	0	0	0.016057	0	5.35829e-05	1.7861e-05	0.000107166	0.0129492	1.7861e-05	1.7861e-05	1.7861e-05	3.57219e-05	0	1.7861e-05	0.000285776	1.7861e-05	1.7861e-05	0	1.7861e-05	0	0	0	0.000142888	0.0268986	0
NEC3-early post partum	0.000571551	0.00139316	0.172144	0.000142888	0.00882332	0.00485818	0.000785883	0.00414375	0.00092877	0.000142888	0.0112881	0.0099307	0.00689433	0.000285776	0.00132171	0.0354719	0.0135386	0.00235765	0.0092877	0	0.00107166	0.000714439	0	0.0448668	0.00164321	0.00132171	7.14439e-05	0.00142888	0.00668	0.00214332	0.055119	0.000321497	0.000857327	0.00703722	0.0132886	0.0108237	0.000535829	0.000214332	0.11306	0.000285776	0.000642995	0.00167893	0.00307209	0.000821605	0.000821605	0.000678717	0.0234693	0.0118954	0.00200043
NEC3-early pre-onset	0.000535829	0.000500107	0.0999143	7.14439e-05	0.00743016	0.00337572	0.00037508	0.000107166	0.395638	0	0.00762663	0.00716225	0.00467957	0.000160749	0.000678717	0.00980567	0.00726941	0.000964492	0.000464385	0	0.00092877	0.000517968	1.7861e-05	0.0220226	0.000982353	0.000750161	0.0763021	0.000910909	0.00307209	0.00151818	0.0320247	0.000160749	0.000482246	0.00373294	0.00701936	0.00791241	0.000125027	0.000107166	0.0744802	0.000303636	0.000125027	0.000946631	0.00223262	0.000410802	0.000446524	0.000642995	0.0138244	0.00182182	0.000517968
NEC3-late pre-onset	1.19073e-05	2.38146e-05	0.00609654	1.19073e-05	0.000500107	7.14439e-05	2.38146e-05	0.000714439	0.521147	0.0321378	0.000261961	0.000250054	0.000190517	3.57219e-05	5.95366e-05	0.000809697	0.00061918	4.76293e-05	0	3.57219e-05	8.33512e-05	2.38146e-05	0	0.00148841	3.57219e-05	3.57219e-05	0.106178	2.38146e-05	0.000142888	0.00013098	0.00207187	0.00868043	5.95366e-05	0.000190517	0.000535829	0.000428663	0	0	0.00495344	0.000261961	2.38146e-05	2.38146e-05	0.000107166	1.19073e-05	2.38146e-05	7.14439e-05	0.0009764	0.0179443	0.00013098
NEC4-early disease	0	0	3.57219e-05	0.000500107	0	0	0	0.00017861	0.000357219	0.0184325	0	0	0	0	0	0	3.57219e-05	0	0.00860899	0.000142888	0	0	0.0122169	0	0	0	0	0	0	0	0	0.00621562	0	0	0	0	0	0	3.57219e-05	0.0129313	0	0	0	0	0	0	0	0.0880903	0
NEC4-early post partum	0.00246481	0.00110738	0.196756	7.14439e-05	0.0104665	0.00417947	0.00196471	7.14439e-05	0.000857327	0.00132171	0.0112524	0.00914482	0.00703722	0.000357219	0.00203615	0.0200757	0.0135386	0.00160749	0.00117882	0.000107166	0.00200043	0.000785883	0.00282203	0.0511895	0.00135743	0.00160749	0.000142888	0.00128599	0.0084661	0.000535829	0.062692	0.000428663	0.0011431	0.007323	0.0143245	0.0112524	0.000142888	0.000250054	0.132243	0.000607273	7.14439e-05	0.00221476	0.00400086	0.00117882	0.000750161	0.000571551	0.0268629	0.00160749	0.00225048
NEC4-early pre-onset	0	0	0.0011431	0	1.7861e-05	3.57219e-05	0	0	1.7861e-05	0.0199686	3.57219e-05	3.57219e-05	3.57219e-05	0	0	0.000160749	0	1.7861e-05	0.000142888	0	0	0	0.145067	0.000410802	3.57219e-05	0	0	1.7861e-05	7.14439e-05	1.7861e-05	0.000267915	0.00446524	1.7861e-05	0	0	0	0	0	5.35829e-05	5.35829e-05	0	0	0	1.7861e-05	0	0	1.7861e-05	0.0492784	1.7861e-05
NEC4-late pre-onset	0	0	0.000750161	0.000250054	0	3.57219e-05	0	0.00460813	0.000321497	0.0922698	0.000107166	7.14439e-05	0.000107166	0	0	7.14439e-05	0	0	0.0226477	0.000107166	3.57219e-05	0	0.00185754	0.00017861	0	0	0	0	0.000107166	0	0.00017861	0.0181825	0	0	0	0	0	0	7.14439e-05	7.14439e-05	0	0	0	0	0	3.57219e-05	0	0.0157534	3.57219e-05
[truncated: 22 more columns]

## Sheet: CTLvsNEC
	ZIBR model				LME model
	p_Time	p_Treat	FDR adjusted p_Treat		p_Time	p_Treat	FDR adjusted p_Treat
OTU317	7.39664e-12	0.687018	0.995775		2.51486e-13	0.585565	0.873882
OTU57	3.33067e-16	0.966299	0.995775		8.76754e-15	0.746401	0.888736
OTU30	1.81521e-13	0.823243	0.995775		7.62978e-17	0.786592	0.888736
OTU738	0.151372	0.292481	0.995775		0.0544181	0.413567	0.873882
OTU736	1.79328e-07	0.0333105	0.788347		1.03951e-07	0.0509491	0.57061
OTU128	3.77476e-15	0.640089	0.995775		8.02177e-17	0.801114	0.888736
OTU322	4.21885e-15	0.974538	0.995775		2.16851e-15	0.733511	0.888736
OTU25	0.324287	0.814367	0.995775		0.260386	0.257313	0.873882
OTU861	0.00272913	0.6475	0.995775		0.686413	0.522927	0.873882
OTU1243	0.0706039	0.339282	0.995775		0.000193341	0.211082	0.873882
OTU1026	1.59872e-14	0.616015	0.995775		2.9575e-15	0.652944	0.888736
OTU46	4.88498e-15	0.958885	0.995775		1.14614e-15	0.985011	0.996254
OTU729	2.33147e-15	0.963783	0.995775		9.73301e-17	0.991765	0.996254
OTU384	5.66103e-13	0.767541	0.995775		2.48234e-11	0.296389	0.873882
OTU1028	1.56986e-13	0.896814	0.995775		9.54375e-15	0.424491	0.873882
OTU234	5.66076e-09	0.608609	0.995775		2.90765e-11	0.576498	0.873882
OTU730	1.91765e-06	0.143713	0.830543		1.90502e-08	0.0803676	0.57061
OTU85	2.33147e-15	0.578002	0.995775		1.37039e-16	0.56343	0.873882
OTU48	0.0326733	0.887449	0.995775		0.511312	0.996254	0.996254
OTU19	0.0597751	0.322455	0.995775		0.207004	0.179212	0.873882
OTU1041	4.66294e-15	0.847507	0.995775		4.54624e-15	0.404257	0.873882
OTU525	1.50879e-13	0.940566	0.995775		5.79452e-12	0.568037	0.873882
OTU718	8.22548e-05	0.691667	0.995775		0.00140749	0.47213	0.873882
OTU1069	1.54798e-12	0.923278	0.995775		2.0915e-15	0.550289	0.873882
OTU870	4.44089e-16	0.925978	0.995775		9.71286e-16	0.888257	0.933053
OTU288	3.55271e-14	0.910439	0.995775		4.42789e-14	0.622627	0.875199
OTU444	0.0215938	0.910133	0.995775		0.390267	0.270844	0.873882
OTU84	1.19127e-13	0.17511	0.830543		6.67772e-14	0.581316	0.873882
OTU714	0.00165848	0.871218	0.995775		0.445669	0.426464	0.873882
OTU108	5.58888e-10	0.106774	0.830543		1.58056e-09	0.0632205	0.57061
OTU325	3.0409e-13	0.170243	0.830543		1.99672e-17	0.700296	0.888736
OTU51	0.00734611	0.0669635	0.830543		3.10297e-06	0.230666	0.873882
OTU1105	5.98222e-08	0.797913	0.995775		0.762006	0.547647	0.873882
OTU734	5.25267e-10	0.0328383	0.788347		2.93116e-09	0.0575244	0.57061
OTU728	9.26877e-07	0.0865337	0.830543		7.33157e-08	0.0531488	0.57061
OTU731	6.89662e-06	0.027317	0.788347		1.01205e-05	0.0440788	0.57061
OTU78	2.45359e-14	0.657263	0.995775		2.79273e-10	0.603102	0.873882
OTU228	2.64111e-12	0.541672	0.995775		2.86215e-11	0.376789	0.873882
OTU401	1.17914e-06	0.0603269	0.830543		1.61456e-07	0.0487435	0.57061
OTU724	0.322857	0.495508	0.995775		0.914461	0.255803	0.873882
OTU1184	3.17042e-05	0.85584	0.995775		0.07077	0.536907	0.873882
OTU1113	6.55032e-15	0.655832	0.995775		2.27138e-15	0.767839	0.888736
OTU125	2.12053e-14	0.955741	0.995775		1.76407e-15	0.554724	0.873882
OTU1021	1.06803e-13	0.851304	0.995775		6.33838e-12	0.455425	0.873882
OTU274	1.54321e-14	0.988031	0.995775		1.42103e-13	0.85031	0.9288
OTU802	2.87548e-13	0.727114	0.995775		4.42126e-13	0.591604	0.873882
OTU752	5.543e-07	0.140802	0.830543		6.16338e-10	0.0651786	0.57061
OTU862	0.000390485	0.512962	0.995775		2.00809e-06	0.511655	0.873882
OTU533	4.29323e-13	0.280415	0.995775		5.35206e-14	0.593524	0.873882
OTU789	0.0931928	0.175467	0.830543		0.00420551	0.702404	0.888736
OTU743	2.39299e-07	0.120913	0.830543		1.06505e-09	0.0735221	0.57061
OTU86	2.43394e-12	0.707837	0.995775		3.34364e-14	0.516165	0.873882
OTU692	0.00538601	0.145137	0.830543		0.32057	0.268196	0.873882
OTU885	0	0.928216	0.995775		3.77993e-18	0.78404	0.888736
OTU122	1.37284e-09	0.512218	0.995775		2.92419e-12	0.537605	0.873882
OTU698	4.92323e-06	0.237082	0.995775		0.122764	0.460192	0.873882
OTU34	2.64677e-13	0.567568	0.995775		1.3702e-13	0.50555	0.873882
OTU89	0.000324914	0.0871244	0.830543		2.90226e-07	0.0456349	0.57061
OTU889	1.33227e-15	0.839463	0.995775		3.18389e-16	0.893628	0.933053
OTU261	9.71445e-14	0.501238	0.995775		1.8482e-14	0.691907	0.888736
OTU29	0.000936966	0.905921	0.995775		6.62967e-07	0.743563	0.888736
OTU82	2.22045e-15	0.851438	0.995775		6.07969e-16	0.628664	0.875199
OTU774	5.92293e-07	0.304407	0.995775		4.09929e-06	0.11715	0.756149
OTU37	2.05563e-11	0.7236	0.995775		1.10628e-11	0.32574	0.873882
OTU999	2.9976e-15	0.995775	0.995775		8.30532e-18	0.790729	0.888736
OTU810	2.88658e-15	0.965928	0.995775		8.31375e-17	0.879436	0.933053
OTU707	0.0413853	0.800197	0.995775		0.0667681	0.438548	0.873882
OTU1001	2.73115e-14	0.429556	0.995775		2.92345e-15	0.690421	0.888736
OTU795	9.01501e-14	0.530234	0.995775		2.04569e-13	0.584559	0.873882
OTU427	1.50469e-12	0.795962	0.995775		6.85634e-15	0.502843	0.873882
OTU869	0.47845	0.688167	0.995775		0.120328	0.599395	0.873882
