# Supplementary material for: Patterned progression of gut microbiota associated with necrotizing enterocolitis and late onset sepsis in preterm infants: a prospective study in a Chinese neonatal intensive care unit
Source: PeerJ. 2019 Jul 22;7:e7310. doi: 10.7717/peerj.7310 (PMC6657676; doi:10.7717/peerj.7310)
Supplement: Table S1 — Each row illustrates the number of sequences and nucleotides, average, minimum and maximum length of reads of the sample. 192 total samples were characterized. [file peerj-07-7310-s001.xls]

## Sheet: 样本信息统计表
Sample\Info	Seq_num	Base_num	Mean_length	Min_length	Max_length
B1901	33363	14995247	449.457	410	454
B0501	30437	13686144	449.655	383	452
B1866	41259	18358519	444.958	344	485
B0108	33076	14878890	449.839	409	563
B0442	31316	14091285	449.971	424	451
B4429	40813	18365080	449.981	430	452
B3621	43172	19407420	449.537	423	451
A1301	42479	19102300	449.688	288	452
B3835	40547	18245181	449.976	327	451
B0809	42645	19181625	449.798	292	451
B1428	40765	18343338	449.978	430	462
B1834	44204	19878476	449.699	406	452
A1307	40570	18237780	449.539	424	451
B0425	42841	19275705	449.936	423	457
B1869	33135	14826037	447.443	422	452
B1859	43632	18784426	430.519	382	451
B3821	36724	16522774	449.918	424	452
B1925	35943	16167533	449.81	425	453
B4428	41759	18790631	449.978	360	451
B3001	38067	17112825	449.545	424	452
B4417	43146	19414178	449.965	343	451
B0450	36497	16319991	447.16	340	452
B1421	44620	20078220	449.983	295	451
B0726	32952	14827678	449.978	430	452
B0420	38570	17355953	449.986	425	451
B1424	44780	20149329	449.963	282	451
B0607	36365	16329457	449.043	283	453
B1422	33733	15179045	449.976	334	451
B3610	38453	17302633	449.968	229	451
B0114	43702	19664030	449.957	275	452
B3849	38943	17519911	449.886	425	452
B2404	38369	17265294	449.98	425	451
B1828	42113	18949925	449.978	425	452
B4321	32792	14755499	449.973	424	451
B1403	30791	13820081	448.835	422	452
B0610	44523	19985671	448.884	283	452
B4304	42480	19083131	449.226	341	452
B1415	79211	35622758	449.72	272	451
B2407	31526	14171173	449.507	401	452
B1504	41450	18587096	448.422	412	452
B1508	36813	16561658	449.886	425	451
B1817	36708	16518024	449.984	363	457
B1811	42963	19328727	449.892	424	451
B1849	39041	17567384	449.973	430	451
B0421	38133	17158970	449.977	371	452
B1904	40320	18110255	449.163	401	452
B3842	34783	15648197	449.881	425	452
B1813	34345	15449918	449.845	283	452
A6620	44465	19579024	440.324	278	539
B1902	38939	17493662	449.258	423	452
B0423	41116	18500043	449.948	360	452
B0605	42991	19311432	449.197	307	453
B0603	35403	15903927	449.225	423	452
B3010	43384	19325830	445.46	348	451
B3004	41475	18647885	449.617	423	453
B0801	32283	14516438	449.662	298	473
B0521	36938	16620623	449.96	280	452
B4102	79677	35591347	446.695	401	452
B4307	74298	32207178	433.486	315	452
B0102	38872	17477301	449.612	273	539
A6608	32584	14653289	449.708	339	452
B0428	39031	17547943	449.59	333	453
B3017	39509	17548040	444.153	379	451
B3828	43957	19778365	449.948	425	452
B1821	36575	16457875	449.976	377	451
B4101	30942	13895951	449.097	286	456
B4407	31775	14288867	449.689	382	451
A1314	30175	13569884	449.706	304	452
B0508	32742	14721997	449.636	372	452
B2442	33811	14957333	442.381	419	456
B4421	43146	19414541	449.973	363	452
B4113	35097	15824904	450.891	425	453
B2414	30276	13623344	449.972	268	451
B3807	40747	18333828	449.943	424	485
B0436	30856	13880639	449.852	335	451
A0121	38590	17363695	449.953	284	452
B2403	30882	13895996	449.971	342	451
B3624	37015	16598575	448.428	348	452
B3618	33117	14691187	443.615	389	452
B3703	31721	14245029	449.073	423	452
B0408	35147	15815074	449.969	424	452
B2424	37401	16829608	449.977	358	451
B1907	41928	18866971	449.985	425	451
A6820	30162	13571812	449.964	424	452
B3714	39110	17598530	449.975	428	452
B1914	33220	14948381	449.981	425	451
B0431	35119	15257156	434.442	419	453
B4414	41461	18656370	449.974	335	451
B3607	41438	18609453	449.091	406	452
B1810	31660	14246401	449.981	425	451
B0457	38638	17282095	447.282	422	452
B0815	34763	15642593	449.978	426	547
A0113	31580	14194324	449.472	274	512
B3839	31884	14347003	449.975	425	451
B0528	43314	19488828	449.943	425	537
B1463	34450	15494241	449.76	391	452
B1621	44887	19920133	443.784	381	453
A0107	43069	19378991	449.952	355	452
B1404	39310	17653551	449.085	413	540
B3601	40777	18305088	448.907	416	452
B4105	37699	16935483	449.229	406	453
B0701	38758	17423940	449.557	413	459
B1910	34347	15455700	449.987	432	451
B4303	34685	15579686	449.176	298	452
B0604	73600	32850406	446.337	340	515
B3014	33691	14944463	443.574	383	451
B3604	43582	19558277	448.77	362	481
B3002	31555	14170209	449.064	340	452
B3007	31070	13870629	446.432	420	451
B2401	35061	15741552	448.976	423	452
B1501	43583	19570158	449.032	423	452
B1401	36319	16319025	449.325	375	452
B1921	38828	17471908	449.982	431	453
B1929	40048	18007830	449.656	429	453
B0514	43635	19622371	449.693	362	453
B3603	43883	19716348	449.294	415	452
B3802	36257	16287670	449.228	401	452
B3628	39654	17808086	449.087	310	452
B0430	36104	15665158	433.89	397	452
B1841	38260	17210695	449.835	425	452
B0619	39085	17586386	449.952	334	451
B0614	30809	13862480	449.949	424	452
A6613	33572	14869601	442.917	304	500
B0402	40108	18034707	449.654	326	452
B0461	39337	17076794	434.115	329	452
B1615	44988	20133143	447.523	417	474
B2418	38896	17502556	449.983	363	452
B0415	37775	16996879	449.95	423	452
B3701	35748	16064689	449.387	381	513
B1807	43659	19645772	449.982	426	454
A6601	32865	14784118	449.844	401	518
B3027	39619	17447238	440.376	331	451
B1521	42809	18576893	433.948	283	452
B1515	40087	17783629	443.626	420	451
B3728	39944	17973721	449.973	333	452
A1316	35452	15883599	448.031	368	455
B2410	33905	15256422	449.976	425	452
B1801	38751	17415126	449.411	370	452
B0818	30016	13506120	449.964	431	481
B3710	39599	17722130	447.54	415	453
B3815	42701	19214730	449.983	430	451
B0121	43932	19439194	442.484	366	452
B2421	31839	14326984	449.982	441	453
B4107	42852	19236088	448.896	363	453
B4002	32412	14564222	449.347	413	452
B0706	44902	20190068	449.647	271	548
B4021	44822	20151464	449.589	422	455
B4028	40714	18318198	449.924	410	452
B3721	39152	17617733	449.983	425	451
B1607	41200	18538121	449.954	324	451
A6801	44867	20176447	449.695	422	452
B0826	33242	14862585	447.103	357	451
B3724	42548	19144855	449.959	423	453
A6805	41315	18590564	449.971	282	559
B1804	33168	14902486	449.303	423	454
B2428	38561	17351891	449.986	441	451
B3707	30737	13824277	449.76	425	452
B4004	36482	16416091	449.978	228	452
B0821	43577	19606237	449.922	425	452
A0102	42723	19220070	449.876	307	452
B3704	42618	19137669	449.051	417	452
B3810	44563	20041448	449.733	340	534
B3717	32247	14509579	449.951	324	451
B2438	30688	13504593	440.061	419	452
B3021	37890	16865526	445.118	418	452
B1604	36557	16455958	450.145	424	452
B4314	36307	16337028	449.969	425	452
B0413	34396	15477118	449.969	401	457
B0410	30912	13909899	449.984	425	453
B1601	62916	27259244	433.264	371	453
B0622	44310	19937636	449.958	424	451
B4121	42256	19040967	450.61	424	452
B0411	44436	19995495	449.984	425	451
B4404	34282	15425616	449.963	415	452
B4014	44497	20020036	449.919	423	451
B3804	38389	17253951	449.45	377	452
B0817	35800	16106840	449.912	408	452
B1445	36305	16232896	447.126	378	452
B1603	35785	16101144	449.941	415	451
B1435	39010	17547160	449.812	425	452
B1442	34657	15577503	449.476	304	452
B1853	40621	17839493	439.169	418	451
B4403	42630	19112388	448.332	424	452
B0714	37748	16985383	449.968	371	452
B1456	43368	18921096	436.292	316	483
B1450	34573	15091957	436.524	419	498
A6812	38309	17237919	449.97	371	451
B3614	32193	14118852	438.569	420	458
B4007	32201	14230485	441.927	420	451
B3813	41614	18725541	449.982	293	518
B2434	32112	14449788	449.981	425	451
B0721	42245	19008712	449.964	331	452
