# Supplementary material for: Patterned progression of gut microbiota associated with necrotizing enterocolitis and late onset sepsis in preterm infants: a prospective study in a Chinese neonatal intensive care unit
Source: PeerJ. 2019 Jul 22;7:e7310. doi: 10.7717/peerj.7310 (PMC6657676; doi:10.7717/peerj.7310)
Supplement: Table S2 [file peerj-07-7310-s002.xlsx]

## Sheet: Sheet 1
peerj-31741-Table_S2
Domain	Kingdom	Phylum	Class	Order	Family	Genus	Species	OTU	A0102	A0107	A0113	A0121	A1301	A1307	A1314	A1316	A6601	A6608	A6613	A6620	A6801	A6805	A6812	A6820	B0102	B0108	B0114	B0121	B0402	B0408	B0410	B0411	B0413	B0415	B0420	B0421	B0423	B0425	B0428	B0430	B0431	B0436	B0442	B0450	B0457	B0461	B0501	B0508	B0514
d__Bacteria	k__norank	p__Firmicutes	c__Bacilli	o__Lactobacillales	f__Aerococcaceae	g__norank_f__Aerococcaceae	s__uncultured_bacterium_g__norank_f__Aerococcaceae	OTU54	0	0	5	0	1	0	0	0	1	0	0	0	2	0	0	0	6	0	0	0	5	0	0	0	0	0	0	0	0	0	0	0	0	0	0	0	0	0	11	7	1
d__Bacteria	k__norank	p__Proteobacteria	c__Alphaproteobacteria	o__Rhizobiales	f__Aurantimonadaceae	g__Martelella	s__Martelella_mediterranea	OTU295	0	0	0	0	0	0	0	0	0	0	0	0	0	0	0	0	0	0	0	0	0	0	0	0	0	0	0	0	0	0	0	0	0	0	0	0	0	0	0	0	0
d__Bacteria	k__norank	p__Firmicutes	c__Clostridia	o__Clostridiales	f__Peptostreptococcaceae	g__Peptoclostridium	s__unclassified_g__Peptoclostridium	OTU865	0	0	2	0	0	0	0	1	1	0	2	2	1	1	0	0	2	0	0	2	1	0	0	0	0	0	0	0	0	0	0	18	22	1	0	41	0	0	0	2	0
d__Bacteria	k__norank	p__Proteobacteria	c__Betaproteobacteria	o__Methylophilales	f__Methylophilaceae	g__Methylobacillus	s__unclassified_g__Methylobacillus	OTU42	1	0	0	0	2	0	0	0	2	0	0	0	3	0	0	0	3	0	0	0	6	0	0	0	0	0	0	0	0	0	0	0	0	0	0	0	0	0	4	3	1
d__Bacteria	k__norank	p__Bacteroidetes	c__Sphingobacteriia	o__Sphingobacteriales	f__Sphingobacteriaceae	g__Sphingobacterium	s__Sphingobacterium_faecium	OTU31	4	1	16	0	25	0	0	0	13	0	1	0	26	0	0	0	40	0	1	0	27	0	0	0	0	3	0	0	0	0	0	0	0	0	0	0	0	0	45	19	28
d__Bacteria	k__norank	p__Proteobacteria	c__Gammaproteobacteria	o__Enterobacteriales	f__Enterobacteriaceae	g__Serratia	s__unclassified_g__Serratia	OTU317	20	3	78	0	125	1	0	0	39	0	0	0	106	0	0	3	134	1	0	1	129	0	0	0	0	2	0	2	0	0	1	0	0	1	0	0	0	0	118	95	52
d__Bacteria	k__norank	p__Proteobacteria	c__Betaproteobacteria	o__Burkholderiales	f__Comamonadaceae	g__Polaromonas	s__unclassified_g__Polaromonas	OTU24	0	0	0	0	6	0	0	0	1	0	0	0	2	0	0	0	6	1	0	0	1	0	0	0	0	0	0	0	0	0	0	0	0	0	0	0	0	0	1	0	0
d__Bacteria	k__norank	p__Firmicutes	c__Bacilli	o__Lactobacillales	f__Streptococcaceae	g__Lactococcus	s__Lactococcus_piscium	OTU190	0	0	3	0	1	0	0	0	2	0	0	0	2	0	0	0	7	0	0	0	3	0	0	0	0	0	0	0	0	0	0	0	0	0	0	0	0	0	8	4	8
d__Bacteria	k__norank	p__Bacteroidetes	c__Flavobacteriia	o__Flavobacteriales	f__Flavobacteriaceae	g__Myroides	s__uncultured_bacterium_g__Myroides	OTU1094	1	1	8	0	5	0	0	0	4	0	0	0	4	0	0	0	9	0	0	0	10	0	0	0	0	2	0	0	0	0	0	0	0	0	0	0	0	0	15	6	11
d__Bacteria	k__norank	p__Bacteroidetes	c__Sphingobacteriia	o__Sphingobacteriales	f__Sphingobacteriaceae	g__Pedobacter	s__Pedobacter_antarcticus	OTU18	1	1	3	0	5	0	0	0	2	0	0	0	3	0	0	0	4	0	0	0	2	0	0	0	0	0	0	0	0	0	0	0	0	0	0	0	0	0	9	7	1
d__Bacteria	k__norank	p__Verrucomicrobia	c__Verrucomicrobiae	o__Verrucomicrobiales	f__Verrucomicrobiaceae	g__Akkermansia	s__Akkermansia_muciniphila	OTU357	0	0	0	0	0	0	0	0	0	0	0	0	0	0	0	0	0	0	0	0	0	0	0	0	0	0	0	0	0	0	0	0	0	3	0	0	0	0	0	0	0
d__Bacteria	k__norank	p__Bacteroidetes	c__Flavobacteriia	o__Flavobacteriales	f__Flavobacteriaceae	g__Flavobacterium	s__Flavobacterium_hydatis	OTU57	8	1	60	0	95	0	0	0	35	2	0	0	75	1	0	0	96	0	0	0	83	0	0	0	0	3	0	0	3	0	1	0	0	3	0	0	0	0	83	74	91
d__Bacteria	k__norank	p__Proteobacteria	c__Gammaproteobacteria	o__Enterobacteriales	f__Enterobacteriaceae	g__Escherichia-Shigella	s__uncultured_Escherichia_sp._g__Escherichia-Shigella	OTU790	0	0	0	0	0	0	0	1	0	0	0	0	0	0	0	0	0	0	0	0	0	0	0	0	0	0	0	0	0	0	0	0	0	0	0	0	0	0	0	0	0
d__Bacteria	k__norank	p__Proteobacteria	c__Gammaproteobacteria	o__Pseudomonadales	f__Pseudomonadaceae	g__Pseudomonas	s__unclassified_g__Pseudomonas	OTU979	3	0	8	0	18	0	0	0	8	0	0	0	14	0	0	0	13	0	0	0	19	0	0	0	0	1	0	0	0	0	0	0	0	2	0	0	0	0	4	12	15
d__Bacteria	k__norank	p__Firmicutes	c__Bacilli	o__Lactobacillales	f__Streptococcaceae	g__Lactococcus	s__Lactococcus_piscium	OTU30	1051	277	6318	8	8241	70	6	24	4021	70	18	20	7270	29	6	9	10501	112	20	19	8182	6	1	4	59	293	16	50	169	167	42	18	1	448	60	25	2	1	10328	7409	8431
d__Bacteria	k__norank	p__Firmicutes	c__Bacilli	o__Lactobacillales	f__Streptococcaceae	g__Lactococcus	s__Lactococcus_raffinolactis	OTU138	0	0	2	0	1	0	0	0	0	0	0	0	2	0	0	0	1	1	0	0	4	0	0	0	0	0	0	0	0	1	0	0	0	0	0	0	0	0	0	1	2
d__Bacteria	k__norank	p__Proteobacteria	c__Gammaproteobacteria	o__Xanthomonadales	f__Xanthomonadaceae	g__Luteibacter	s__unclassified_g__Luteibacter	OTU850	0	0	0	0	0	0	0	0	0	0	0	0	0	0	0	0	1	0	0	0	3	0	0	0	0	0	0	0	0	0	0	0	0	1	0	0	0	0	0	0	0
d__Bacteria	k__norank	p__Proteobacteria	c__Betaproteobacteria	o__Burkholderiales	f__Alcaligenaceae	g__Alcaligenes	s__uncultured_bacterium_g__Alcaligenes	OTU72	0	0	0	0	1	0	0	0	0	0	0	0	1	0	0	0	2	0	0	0	1	0	0	0	0	0	0	0	0	1	0	0	0	0	0	0	0	0	10	0	0
d__Bacteria	k__norank	p__Firmicutes	c__Bacilli	o__Bacillales	f__Staphylococcaceae	g__Staphylococcus	s__unclassified_g__Staphylococcus	OTU435	0	5	0	0	0	0	0	0	0	0	0	0	0	0	0	0	0	0	0	0	0	0	0	0	0	0	0	0	1	0	0	0	0	0	0	2	0	0	0	0	0
d__Bacteria	k__norank	p__Firmicutes	c__Bacilli	o__Lactobacillales	f__Streptococcaceae	g__Lactococcus	s__Lactococcus_piscium	OTU211	2	0	13	0	9	0	0	0	11	1	0	0	11	0	0	0	47	0	0	0	6	0	0	0	0	0	0	0	0	0	0	0	0	2	0	0	0	0	16	6	8
d__Bacteria	k__norank	p__Proteobacteria	c__Gammaproteobacteria	o__Pseudomonadales	f__Pseudomonadaceae	g__Pseudomonas	s__Pseudomonas_aeruginosa_g__Pseudomonas	OTU738	0	0	1	0	0	0	0	0	0	0	0	0	0	0	0	0	0	0	0	0	0	0	0	0	0	0	0	0	1	1	0	0	0	0	0	0	0	4	0	1	0
d__Bacteria	k__norank	p__Firmicutes	c__Bacilli	o__Bacillales	f__Planococcaceae	g__Lysinibacillus	s__unclassified_g__Lysinibacillus	OTU142	0	0	0	0	0	0	0	0	0	0	0	0	0	0	0	0	0	0	0	0	0	0	0	0	0	0	0	0	2	1	0	0	0	4	0	0	0	0	0	0	0
d__Bacteria	k__norank	p__Proteobacteria	c__Gammaproteobacteria	o__Enterobacteriales	f__Enterobacteriaceae	g__Hafnia-Obesumbacterium	s__unclassified_g__Hafnia-Obesumbacterium	OTU256	3	0	6	0	12	0	0	0	3	0	0	0	4	0	0	0	9	0	0	0	16	0	0	0	0	1	0	0	0	1	0	0	0	0	0	0	0	0	6	7	6
d__Bacteria	k__norank	p__Firmicutes	c__Bacilli	o__Bacillales	f__Staphylococcaceae	g__Staphylococcus	s__unclassified_g__Staphylococcus	OTU458	0	0	0	0	0	0	0	0	0	0	0	0	0	0	0	0	0	0	0	0	0	0	0	0	0	0	0	0	0	0	0	0	0	0	0	0	0	0	0	0	0
d__Bacteria	k__norank	p__Firmicutes	c__Bacilli	o__Lactobacillales	f__Streptococcaceae	g__Lactococcus	s__Lactococcus_piscium	OTU236	0	0	0	0	1	0	0	0	1	0	0	0	3	0	0	0	0	0	0	0	0	0	0	0	0	0	0	0	0	0	0	0	0	0	0	0	0	0	1	1	1
d__Bacteria	k__norank	p__Proteobacteria	c__Gammaproteobacteria	o__Xanthomonadales	f__Xanthomonadaceae	g__Stenotrophomonas	s__Stenotrophomonas_rhizophila_g__Stenotrophomonas	OTU315	2	0	10	0	9	0	0	0	4	0	0	0	14	0	0	0	19	1	0	0	14	0	0	0	1	0	0	0	0	0	0	0	0	1	1	0	0	0	10	5	11
d__Bacteria	k__norank	p__Actinobacteria	c__Actinobacteria	o__Propionibacteriales	f__Propionibacteriaceae	g__Propionibacterium	s__unclassified_g__Propionibacterium	OTU354	0	0	0	0	0	0	0	0	0	0	0	0	0	0	0	0	0	0	0	0	0	0	0	0	0	0	0	0	0	0	0	0	0	1	0	0	0	0	0	0	0
d__Bacteria	k__norank	p__Firmicutes	c__Bacilli	o__Bacillales	f__Bacillaceae	g__Bacillus	s__Bacillus_oceanisediminis_g__Bacillus	OTU736	0	0	0	0	2	0	0	0	0	0	0	0	0	0	0	0	0	0	0	0	4	0	0	0	4	0	3	0	16	11	0	0	0	33	4	1	0	0	0	1	1
d__Bacteria	k__norank	p__Firmicutes	c__Bacilli	o__Lactobacillales	f__Streptococcaceae	g__Lactococcus	s__Lactococcus_piscium	OTU1073	0	0	1	0	8	0	0	0	3	0	0	0	4	0	0	0	3	1	0	0	10	0	0	0	0	0	0	0	0	0	0	0	0	0	0	0	0	0	4	5	2
d__Bacteria	k__norank	p__Proteobacteria	c__Gammaproteobacteria	o__Pseudomonadales	f__Pseudomonadaceae	g__Pseudomonas	s__Pseudomonas_brenneri	OTU128	17	9	99	0	182	1	1	0	100	1	0	0	151	1	0	0	112	0	1	1	176	0	0	0	3	5	0	3	5	6	1	0	0	16	2	1	0	0	119	71	102
d__Bacteria	k__norank	p__Proteobacteria	c__Gammaproteobacteria	o__Pseudomonadales	f__Pseudomonadaceae	g__Pseudomonas	s__unclassified_g__Pseudomonas	OTU1242	0	0	0	0	0	0	0	0	0	0	0	0	0	0	0	0	0	0	0	0	0	0	0	0	0	0	0	0	0	0	0	0	0	0	0	0	0	0	0	0	0
d__Bacteria	k__norank	p__Proteobacteria	c__Betaproteobacteria	o__Burkholderiales	f__Oxalobacteraceae	g__Massilia	s__unclassified_g__Massilia	OTU53	1	0	1	0	2	0	0	0	0	0	0	0	0	0	0	0	0	0	0	0	10	0	0	0	0	0	0	0	0	0	0	0	0	0	0	0	0	0	1	0	2
d__Bacteria	k__norank	p__Firmicutes	c__Bacilli	o__Lactobacillales	f__Leuconostocaceae	g__Leuconostoc	s__unclassified_g__Leuconostoc	OTU322	11	0	47	0	53	2	0	1	24	0	0	0	36	0	1	0	77	0	0	0	83	0	0	0	0	3	0	0	0	1	2	0	0	0	0	0	0	0	67	55	54
d__Bacteria	k__norank	p__Actinobacteria	c__Actinobacteria	o__Propionibacteriales	f__Propionibacteriaceae	g__Propionibacterium	s__Propionibacterium_granulosum	OTU785	0	0	0	0	0	0	0	0	0	0	0	0	0	0	0	0	0	0	0	0	0	0	0	0	0	0	0	0	3	0	0	0	0	0	1	0	0	0	0	0	0
d__Bacteria	k__norank	p__Firmicutes	c__Bacilli	o__Bacillales	f__Bacillaceae	g__Bacillus	s__unclassified_g__Bacillus	OTU302	0	0	0	0	0	0	0	0	0	0	0	0	0	0	0	0	0	0	0	0	0	0	0	0	0	0	0	0	0	0	0	0	0	2	0	0	0	0	0	0	0
d__Bacteria	k__norank	p__Firmicutes	c__Bacilli	o__Lactobacillales	f__Streptococcaceae	g__Streptococcus	s__unclassified_g__Streptococcus	OTU25	4	4	7633	42	4	513	0	4	1	5884	37	9	6737	1184	7	70	70	2744	201	5	5	194	74	46	8263	10	138	480	325	2529	447	379	40	320	41	1373	60	5	2	6464	4987
d__Bacteria	k__norank	p__Proteobacteria	c__Alphaproteobacteria	o__Sphingomonadales	f__Sphingomonadaceae	g__Sphingobium	s__Sphingobium_yanoikuyae	OTU721	0	0	0	0	0	0	0	0	0	0	0	0	0	0	0	0	0	0	0	0	0	0	0	0	0	0	0	0	0	0	0	0	0	0	0	0	0	0	0	2	0
d__Bacteria	k__norank	p__Proteobacteria	c__Gammaproteobacteria	o__Enterobacteriales	f__Enterobacteriaceae	g__unclassified_f__Enterobacteriaceae	s__unclassified_f__Enterobacteriaceae	OTU129	0	0	0	0	0	0	32	57	1	0	0	0	0	0	0	9	0	0	0	0	0	0	0	0	0	0	0	0	0	0	0	0	0	0	0	0	0	0	0	0	0
d__Bacteria	k__norank	p__Proteobacteria	c__Gammaproteobacteria	o__Oceanospirillales	f__Halomonadaceae	g__Halomonas	s__unclassified_g__Halomonas	OTU374	0	0	13	0	16	0	0	0	4	0	0	0	13	0	0	0	14	0	0	0	14	0	0	0	0	0	0	0	0	0	0	0	0	0	0	0	0	0	11	6	11
d__Bacteria	k__norank	p__Bacteroidetes	c__Flavobacteriia	o__Flavobacteriales	f__Flavobacteriaceae	g__Chryseobacterium	s__unclassified_g__Chryseobacterium	OTU914	2	0	6	0	3	0	0	0	3	0	0	0	6	0	0	0	5	0	0	0	3	0	0	0	0	0	0	0	0	0	0	0	0	0	0	0	0	0	9	7	8
d__Bacteria	k__norank	p__Firmicutes	c__Bacilli	o__Bacillales	f__Staphylococcaceae	g__Staphylococcus	s__unclassified_g__Staphylococcus	OTU861	5	2152	25	2	1	4	1	1	1	52	5	1	5	0	0	0	25	2	808	1	3	0	24	4	2	1	26	3	548	43	584	42	3	11	4	2075	41	3	10	9	32
d__Bacteria	k__norank	p__Firmicutes	c__Bacilli	o__Bacillales	f__Staphylococcaceae	g__Staphylococcus	s__unclassified_g__Staphylococcus	OTU516	0	1	0	0	0	0	0	0	0	0	0	0	0	0	0	0	0	0	0	0	0	0	0	0	0	0	0	0	0	0	0	0	0	0	0	0	0	0	0	0	0
d__Bacteria	k__norank	p__Firmicutes	c__Bacilli	o__Lactobacillales	f__Streptococcaceae	g__Lactococcus	s__Lactococcus_piscium	OTU281	2	0	1	0	8	0	0	0	0	0	0	0	0	0	0	0	0	0	0	0	2	0	0	0	0	0	0	0	0	0	0	0	0	0	0	0	0	0	0	1	4
d__Bacteria	k__norank	p__Proteobacteria	c__Gammaproteobacteria	o__Enterobacteriales	f__Enterobacteriaceae	g__unclassified_f__Enterobacteriaceae	s__unclassified_f__Enterobacteriaceae	OTU1243	0	0	10	2	2	0	781	1393	0	0	0	1	0	2	3	2	0	0	0	0	1	0	0	0	0	0	0	0	0	0	0	0	0	0	0	0	0	5	1	1	1
d__Bacteria	k__norank	p__Firmicutes	c__Bacilli	o__Lactobacillales	f__Streptococcaceae	g__Streptococcus	s__unclassified_g__Streptococcus	OTU508	0	0	4	0	0	1	0	0	0	2	0	0	2	0	0	0	0	0	0	0	0	0	0	0	3	0	0	0	0	1	2	0	0	0	0	0	0	0	0	5	2
d__Bacteria	k__norank	p__Proteobacteria	c__Gammaproteobacteria	o__Pseudomonadales	f__Pseudomonadaceae	g__Pseudomonas	s__unclassified_g__Pseudomonas	OTU1002	0	0	0	0	0	0	0	0	2	0	0	0	1	0	0	0	2	0	0	0	0	0	0	0	0	0	0	1	0	0	0	0	0	0	0	0	0	0	0	0	0
d__Bacteria	k__norank	p__Proteobacteria	c__Gammaproteobacteria	o__Pseudomonadales	f__Pseudomonadaceae	g__Pseudomonas	s__Pseudomonas_brenneri	OTU1026	237	40	856	0	1126	11	1	0	459	14	1	0	965	3	0	1	1052	17	2	1	1057	1	0	0	4	59	0	19	10	11	7	0	0	40	1	0	1	0	1179	940	910
d__Bacteria	k__norank	p__Proteobacteria	c__Gammaproteobacteria	o__unclassified_c__Gammaproteobacteria	f__unclassified_c__Gammaproteobacteria	g__unclassified_c__Gammaproteobacteria	s__unclassified_c__Gammaproteobacteria	OTU703	0	0	0	0	0	0	0	0	0	0	0	0	0	0	0	0	0	0	0	0	0	0	0	0	0	0	0	0	0	0	0	0	0	0	0	0	0	0	0	0	0
d__Bacteria	k__norank	p__Firmicutes	c__Bacilli	o__Lactobacillales	f__Enterococcaceae	g__Vagococcus	s__uncultured_bacterium_g__Vagococcus	OTU527	2	0	2	0	4	0	0	0	1	0	1	0	3	0	1	0	6	1	0	0	8	0	0	0	1	1	0	0	1	0	0	0	0	1	0	0	0	0	5	1	8
d__Bacteria	k__norank	p__Proteobacteria	c__Gammaproteobacteria	o__Pseudomonadales	f__Moraxellaceae	g__Acinetobacter	s__Acinetobacter_junii_NIPH_182	OTU1111	0	0	3	0	0	0	0	0	0	0	0	0	0	0	1	0	0	0	0	0	0	0	0	0	0	0	0	0	0	0	0	0	0	0	0	0	0	0	0	1	2
d__Bacteria	k__norank	p__Proteobacteria	c__Gammaproteobacteria	o__Pseudomonadales	f__Pseudomonadaceae	g__Pseudomonas	s__unclassified_g__Pseudomonas	OTU1075	0	0	2	0	4	0	0	0	1	0	0	0	5	0	0	0	3	0	0	0	4	0	0	0	0	0	0	0	0	0	0	0	0	0	0	0	0	0	5	1	1
d__Bacteria	k__norank	p__Firmicutes	c__unclassified_p__Firmicutes	o__unclassified_p__Firmicutes	f__unclassified_p__Firmicutes	g__unclassified_p__Firmicutes	s__unclassified_p__Firmicutes	OTU690	0	0	0	0	0	0	0	0	0	0	0	2	0	0	0	0	0	0	0	0	0	0	0	0	0	0	0	0	0	0	0	0	0	0	0	0	0	0	0	0	0
d__Bacteria	k__norank	p__Firmicutes	c__Clostridia	o__Clostridiales	f__Family_XI_o__Clostridiales	g__Finegoldia	s__uncultured_bacterium_g__Finegoldia	OTU807	0	0	0	0	0	0	0	0	0	0	0	0	0	0	0	0	0	0	0	0	0	0	0	0	0	0	0	0	0	0	0	0	0	0	0	0	0	0	0	0	0
d__Bacteria	k__norank	p__Firmicutes	c__Negativicutes	o__Selenomonadales	f__Acidaminococcaceae	g__Phascolarctobacterium	s__unclassified_g__Phascolarctobacterium	OTU64	0	0	0	0	0	0	0	0	0	0	0	0	0	0	0	0	0	0	0	0	0	0	0	0	0	0	0	0	0	4	0	0	1	1	0	0	0	0	0	0	0
d__Bacteria	k__norank	p__Proteobacteria	c__Betaproteobacteria	o__Burkholderiales	f__Comamonadaceae	g__unclassified_f__Comamonadaceae	s__unclassified_f__Comamonadaceae	OTU1117	0	0	6	0	7	0	0	0	2	0	0	0	9	0	0	0	6	0	0	0	12	0	0	0	0	0	0	0	0	0	0	0	0	0	1	0	0	0	9	8	2
d__Bacteria	k__norank	p__Deinococcus-Thermus	c__Deinococci	o__Deinococcales	f__Deinococcaceae	g__Deinococcus	s__Deinococcus_sp._Lab-1	OTU744	0	0	0	0	0	0	0	0	0	0	0	0	0	0	0	0	0	0	0	0	0	0	0	0	0	0	0	0	0	0	0	0	0	0	0	0	0	0	1	0	0
d__Bacteria	k__norank	p__Proteobacteria	c__Gammaproteobacteria	o__Pseudomonadales	f__Moraxellaceae	g__Psychrobacter	s__Psychrobacter_cibarius	OTU46	114	28	469	0	700	8	0	1	288	10	0	0	500	0	0	1	647	9	1	0	649	0	0	0	2	31	0	5	12	12	2	1	0	40	0	2	0	0	715	571	596
d__Bacteria	k__norank	p__Proteobacteria	c__Gammaproteobacteria	o__Xanthomonadales	f__Xanthomonadaceae	g__Stenotrophomonas	s__unclassified_g__Stenotrophomonas	OTU32	1	0	7	0	4	0	0	0	2	0	0	0	10	0	0	0	7	0	0	0	2	0	0	0	0	0	0	0	0	0	0	0	0	0	0	0	0	0	6	10	5
d__Bacteria	k__norank	p__Actinobacteria	c__Actinobacteria	o__Micrococcales	f__Micrococcaceae	g__unclassified_f__Micrococcaceae	s__unclassified_f__Micrococcaceae	OTU655	0	0	1	0	2	0	0	0	0	0	0	0	1	0	0	0	3	0	0	0	0	0	0	0	0	0	0	0	0	0	0	0	0	0	0	0	0	0	0	0	0
d__Bacteria	k__norank	p__Actinobacteria	c__Actinobacteria	o__Bifidobacteriales	f__Bifidobacteriaceae	g__Bifidobacterium	s__unclassified_g__Bifidobacterium	OTU537	0	0	0	0	0	0	0	0	1	0	0	0	0	0	0	0	0	0	0	0	0	0	0	0	0	0	0	0	0	0	0	0	0	0	0	0	0	6	0	0	1
d__Bacteria	k__norank	p__Proteobacteria	c__Alphaproteobacteria	o__Caulobacterales	f__Caulobacteraceae	g__Brevundimonas	s__unclassified_g__Brevundimonas	OTU159	0	0	1	0	8	0	0	0	1	0	0	0	3	0	0	0	4	0	0	0	0	0	0	0	1	2	0	0	0	0	0	0	0	0	0	0	0	0	2	1	3
d__Bacteria	k__norank	p__Firmicutes	c__Bacilli	o__Lactobacillales	f__Streptococcaceae	g__Streptococcus	s__unclassified_g__Streptococcus	OTU729	25	4	141	0	259	0	1	1	103	4	1	1	183	0	0	0	278	0	2	3	272	0	0	0	2	11	1	2	8	5	0	0	0	14	2	0	0	0	282	235	240
d__Bacteria	k__norank	p__Bacteroidetes	c__Flavobacteriia	o__Flavobacteriales	f__Flavobacteriaceae	g__Chryseobacterium	s__Chryseobacterium_soldanellicola	OTU149	5	0	13	0	29	0	0	0	11	1	0	0	12	1	0	0	30	0	0	0	23	0	0	0	0	1	0	0	0	0	0	0	0	1	0	0	0	0	34	17	20
d__Bacteria	k__norank	p__Bacteroidetes	c__Flavobacteriia	o__Flavobacteriales	f__Flavobacteriaceae	g__Flavobacterium	s__unclassified_g__Flavobacterium	OTU384	16	3	80	0	152	0	0	0	44	2	1	0	84	1	0	0	166	1	0	0	104	0	0	0	0	1	0	2	0	0	1	0	0	1	0	0	0	0	130	99	93
d__Bacteria	k__norank	p__Actinobacteria	c__Actinobacteria	o__Nitriliruptorales	f__Nitriliruptoraceae	g__norank_f__Nitriliruptoraceae	s__unclassified_g__norank_f__Nitriliruptoraceae	OTU382	0	0	4	0	1	0	0	0	0	0	0	0	6	0	0	0	5	0	0	0	2	0	0	0	0	0	0	0	0	0	0	0	0	0	0	0	0	0	1	0	6
d__Bacteria	k__norank	p__Proteobacteria	c__Gammaproteobacteria	o__Pseudomonadales	f__Pseudomonadaceae	g__Pseudomonas	s__unclassified_g__Pseudomonas	OTU875	0	0	4	0	0	0	0	3	0	0	1	1	1	4	0	0	0	0	0	4	1	0	0	0	1	0	0	0	2	0	0	0	0	1	11	2	3	0	0	0	1
d__Bacteria	k__norank	p__Bacteroidetes	c__Flavobacteriia	o__Flavobacteriales	f__Flavobacteriaceae	g__Epilithonimonas	s__uncultured_bacterium_g__Epilithonimonas	OTU38	3	0	5	0	10	0	0	0	2	0	0	0	8	0	0	0	14	0	0	0	8	0	0	0	0	2	0	0	0	0	0	0	0	0	0	0	0	0	10	6	8
d__Bacteria	k__norank	p__Firmicutes	c__Bacilli	o__Lactobacillales	f__Streptococcaceae	g__Lactococcus	s__Lactococcus_piscium	OTU1028	4	2	45	0	141	1	0	0	98	1	0	0	102	1	0	0	81	0	1	2	118	0	0	0	0	3	0	2	2	1	0	0	0	3	0	0	0	0	69	45	66
d__Bacteria	k__norank	p__Firmicutes	c__Bacilli	o__Lactobacillales	f__Leuconostocaceae	g__Leuconostoc	s__Leuconostoc_gelidum_subsp._gasicomitatum	OTU777	3	0	13	0	13	1	0	0	8	0	0	0	11	0	0	0	14	0	0	0	26	0	0	0	0	1	0	0	0	1	0	0	0	2	0	0	0	0	18	15	10
d__Bacteria	k__norank	p__Bacteroidetes	c__Bacteroidia	o__Bacteroidales	f__Bacteroidaceae	g__Bacteroides	s__unclassified_g__Bacteroides	OTU59	2	0	18	0	26	0	0	0	10	1	0	0	11	0	0	0	28	1	0	0	39	0	0	0	0	3	0	0	0	0	0	0	0	0	0	0	0	0	38	21	25
d__Bacteria	k__norank	p__Firmicutes	c__Bacilli	o__Bacillales	f__Bacillaceae	g__Bacillus	s__unclassified_g__Bacillus	OTU695	0	0	0	0	0	0	0	0	0	0	0	0	0	0	0	0	0	0	0	0	0	0	0	0	0	0	0	0	0	1	0	0	0	0	0	0	0	0	0	2	0
d__Bacteria	k__norank	p__Firmicutes	c__Bacilli	o__Lactobacillales	f__Streptococcaceae	g__Lactococcus	s__Lactococcus_piscium	OTU309	1	0	8	0	3	0	0	0	2	0	0	0	4	0	0	0	8	0	0	0	5	0	0	0	0	0	0	0	0	0	0	0	0	0	0	0	0	0	4	5	1
d__Bacteria	k__norank	p__Firmicutes	c__Clostridia	o__Clostridiales	f__Peptostreptococcaceae	g__Peptoclostridium	s__unclassified_g__Peptoclostridium	OTU766	0	0	0	0	0	0	0	0	0	0	0	19	0	0	0	0	0	0	0	0	0	0	0	0	0	0	0	0	0	0	0	0	134	0	0	1	23	32	0	0	0
d__Bacteria	k__norank	p__Firmicutes	c__Clostridia	o__Clostridiales	f__Clostridiaceae_1	g__Clostridium_sensu_stricto_1	s__unclassified_g__Clostridium_sensu_stricto_1	OTU521	0	0	0	0	0	0	0	1	0	0	0	1198	0	0	0	0	0	0	0	0	0	0	0	0	0	0	0	0	0	0	0	0	0	0	1	0	0	0	0	0	0
d__Bacteria	k__norank	p__Proteobacteria	c__Betaproteobacteria	o__Burkholderiales	f__Comamonadaceae	g__Giesbergeria	s__uncultured_bacterium_g__Giesbergeria	OTU398	0	0	7	0	3	0	0	0	2	0	0	0	3	0	0	0	4	1	0	0	2	0	0	0	0	0	0	0	0	0	0	0	0	0	0	0	0	0	4	1	2
d__Bacteria	k__norank	p__Firmicutes	c__Bacilli	o__Bacillales	f__Staphylococcaceae	g__Staphylococcus	s__unclassified_g__Staphylococcus	OTU488	0	0	0	0	0	0	0	0	0	0	0	0	0	0	0	0	0	0	0	0	0	0	0	0	0	0	0	0	0	0	0	0	0	0	0	1	0	0	0	0	0
d__Bacteria	k__norank	p__Actinobacteria	c__Actinobacteria	o__Corynebacteriales	f__Dietziaceae	g__Dietzia	s__unclassified_g__Dietzia	OTU373	3	0	10	0	3	0	0	0	1	0	0	0	5	0	0	0	5	0	0	0	8	0	0	0	0	1	0	1	0	0	0	0	0	0	0	0	0	0	11	7	3
d__Bacteria	k__norank	p__Proteobacteria	c__Gammaproteobacteria	o__Pseudomonadales	f__Moraxellaceae	g__Acinetobacter	s__unclassified_g__Acinetobacter	OTU932	0	0	4	0	7	0	0	0	0	0	0	0	0	0	0	0	5	0	0	0	20	0	0	0	0	2	0	0	0	0	0	0	0	0	0	0	0	0	7	8	1
d__Bacteria	k__norank	p__Firmicutes	c__Bacilli	o__Lactobacillales	f__Streptococcaceae	g__Lactococcus	s__Lactococcus_piscium	OTU245	1	0	3	0	7	0	0	0	0	0	0	0	2	0	0	0	6	0	0	0	3	0	0	0	0	0	0	0	0	0	0	0	0	0	0	0	0	0	3	2	0
d__Bacteria	k__norank	p__Firmicutes	c__Bacilli	o__Bacillales	f__Staphylococcaceae	g__Staphylococcus	s__unclassified_g__Staphylococcus	OTU418	0	1	0	0	0	0	0	0	0	0	0	0	0	0	0	0	0	0	2	0	0	0	0	0	0	0	0	0	0	0	2	0	0	0	0	2	0	0	0	0	0
d__Bacteria	k__norank	p__Proteobacteria	c__Gammaproteobacteria	o__Pseudomonadales	f__Moraxellaceae	g__Perlucidibaca	s__unclassified_g__Perlucidibaca	OTU1	10	1	56	0	61	0	0	0	16	0	0	0	11	0	0	0	54	1	0	0	78	0	0	0	0	3	0	0	0	0	0	0	0	0	0	0	0	0	55	59	17
d__Bacteria	k__norank	p__Actinobacteria	c__Actinobacteria	o__Micrococcales	f__Micrococcaceae	g__Arthrobacter	s__Arthrobacter_psychrolactophilus	OTU234	12	3	43	0	31	0	0	0	11	1	0	0	18	0	0	0	56	0	0	0	90	0	0	1	9	0	3	0	20	37	1	2	0	48	9	2	0	0	87	58	25
d__Bacteria	k__norank	p__Bacteroidetes	c__Bacteroidia	o__Bacteroidales	f__Porphyromonadaceae	g__Porphyromonas	s__Porphyromonas_levii	OTU745	0	1	2	0	0	0	0	0	0	0	0	0	1	0	0	0	0	0	0	0	2	0	0	0	0	0	0	0	0	1	0	0	0	1	1	0	0	0	1	1	1
d__Bacteria	k__norank	p__Actinobacteria	c__Actinobacteria	o__Micrococcales	f__Micrococcaceae	g__Rothia	s__Rothia_terrae	OTU708	1	1	4	0	1	0	0	0	0	0	0	0	2	0	0	0	5	0	0	0	0	0	0	0	0	0	0	0	0	0	0	0	0	0	0	0	0	0	3	4	0
d__Bacteria	k__norank	p__Proteobacteria	c__Betaproteobacteria	o__Burkholderiales	f__Comamonadaceae	g__unclassified_f__Comamonadaceae	s__unclassified_f__Comamonadaceae	OTU871	0	0	0	0	1	0	0	0	1	0	0	0	0	0	0	0	0	0	0	0	2	0	0	0	0	0	0	0	0	0	0	0	0	0	0	0	0	0	2	0	2
d__Bacteria	k__norank	p__Firmicutes	c__Bacilli	o__Bacillales	f__Bacillaceae	g__Fictibacillus	s__Fictibacillus_arsenicus	OTU395	0	0	0	0	0	0	0	0	0	0	0	0	0	0	0	0	0	0	0	0	0	0	0	0	1	0	0	0	0	1	0	0	0	4	0	0	0	0	0	0	0
d__Bacteria	k__norank	p__Firmicutes	c__Bacilli	o__Bacillales	f__Planococcaceae	g__Lysinibacillus	s__unclassified_g__Lysinibacillus	OTU730	0	0	0	0	0	0	0	0	0	0	0	0	0	0	0	0	0	0	0	0	1	0	0	0	3	0	4	0	17	10	0	1	0	34	3	0	0	0	1	0	0
d__Bacteria	k__norank	p__Proteobacteria	c__Gammaproteobacteria	o__Pseudomonadales	f__Pseudomonadaceae	g__Pseudomonas	s__unclassified_g__Pseudomonas	OTU1088	4	0	8	0	13	0	0	0	8	0	0	0	18	0	0	0	22	0	0	0	24	0	0	0	0	1	0	0	2	0	0	0	0	2	0	0	0	0	9	12	3
d__Bacteria	k__norank	p__Firmicutes	c__unclassified_p__Firmicutes	o__unclassified_p__Firmicutes	f__unclassified_p__Firmicutes	g__unclassified_p__Firmicutes	s__unclassified_p__Firmicutes	OTU68	0	0	0	0	0	0	0	0	0	0	0	0	0	0	0	0	0	0	0	0	0	0	0	0	0	0	0	0	0	0	0	0	24	0	0	0	27	20	0	0	0
d__Bacteria	k__norank	p__Firmicutes	c__Bacilli	o__Lactobacillales	f__Lactobacillaceae	g__Lactobacillus	s__unclassified_g__Lactobacillus	OTU85	2	1	37	0	51	0	0	0	16	0	0	0	14	0	0	0	53	0	0	0	88	0	0	0	0	1	0	0	0	3	1	0	0	3	1	0	0	1	76	40	13
d__Bacteria	k__norank	p__Proteobacteria	c__Gammaproteobacteria	o__Enterobacteriales	f__Enterobacteriaceae	g__Escherichia-Shigella	s__unclassified_g__Escherichia-Shigella	OTU764	0	0	0	0	0	0	1	22	0	0	22	9	0	0	0	0	0	0	0	45	0	0	0	0	0	0	0	0	0	0	0	0	6	0	0	23	3	1	0	0	0
d__Bacteria	k__norank	p__Firmicutes	c__Bacilli	o__Lactobacillales	f__Carnobacteriaceae	g__Atopostipes	s__uncultured_bacterium_g__Atopostipes	OTU381	2	0	10	0	10	0	0	0	11	0	0	0	6	0	0	0	10	0	0	0	5	0	0	0	0	0	0	0	0	0	0	0	0	0	0	0	0	0	12	6	5
d__Bacteria	k__norank	p__Fusobacteria	c__Fusobacteriia	o__Fusobacteriales	f__Fusobacteriaceae	g__Fusobacterium	s__Fusobacterium_necrophorum_subsp._necrophorum	OTU80	0	0	4	0	5	0	0	0	3	0	0	0	7	0	0	0	4	0	0	0	3	0	0	0	0	0	0	0	0	0	0	0	0	0	0	0	0	0	4	0	9
d__Bacteria	k__norank	p__Bacteroidetes	c__Bacteroidia	o__Bacteroidales	f__Porphyromonadaceae	g__Porphyromonas	s__unclassified_g__Porphyromonas	OTU76	0	0	5	0	1	0	0	0	2	0	0	0	1	0	0	0	4	0	0	0	3	0	0	0	0	0	0	0	0	0	0	0	0	0	0	0	0	0	3	2	2
d__Bacteria	k__norank	p__Proteobacteria	c__Alphaproteobacteria	o__Caulobacterales	f__Caulobacteraceae	g__Brevundimonas	s__Brevundimonas_intermedia	OTU830	1	0	2	0	3	0	0	0	3	0	0	0	1	0	0	0	6	0	0	0	1	0	0	0	0	0	0	0	0	0	0	0	0	0	0	0	0	0	1	1	0
d__Bacteria	k__norank	p__Proteobacteria	c__Alphaproteobacteria	o__Rhodobacterales	f__Rhodobacteraceae	g__Paracoccus	s__unclassified_g__Paracoccus	OTU1101	0	0	0	0	0	0	0	0	1	0	0	0	1	0	0	0	1	0	0	0	1	0	0	0	0	0	0	0	0	0	0	1	0	0	0	0	0	0	0	0	0
d__Bacteria	k__norank	p__Bacteroidetes	c__Sphingobacteriia	o__Sphingobacteriales	f__Sphingobacteriaceae	g__Pedobacter	s__unclassified_g__Pedobacter	OTU33	2	0	1	0	7	0	0	0	1	0	0	0	4	0	0	0	11	0	0	0	8	0	0	0	0	0	0	0	0	0	0	0	0	0	0	0	0	0	3	16	4
d__Bacteria	k__norank	p__Proteobacteria	c__Gammaproteobacteria	o__unclassified_c__Gammaproteobacteria	f__unclassified_c__Gammaproteobacteria	g__unclassified_c__Gammaproteobacteria	s__unclassified_c__Gammaproteobacteria	OTU523	0	0	0	0	0	0	0	0	0	0	0	0	0	0	0	0	0	0	0	0	0	0	0	0	0	0	0	0	0	0	0	0	2	0	0	0	15	42	0	0	0
d__Bacteria	k__norank	p__Proteobacteria	c__Gammaproteobacteria	o__Enterobacteriales	f__Enterobacteriaceae	g__Pantoea	s__Pantoea_sp._PSNIH2	OTU1015	0	0	0	0	0	0	0	0	0	0	0	0	0	0	0	0	1	0	0	0	0	0	0	0	0	0	0	0	0	0	0	0	0	2	0	0	0	0	1	0	0
d__Bacteria	k__norank	p__Firmicutes	c__Bacilli	o__Lactobacillales	f__Enterococcaceae	g__Enterococcus	s__unclassified_g__Enterococcus	OTU48	24234	24292	13	26	7	334	1	6	372	515	218	86	11	132	998	336	5	2335	5280	620	9	793	938	1951	19083	26659	27635	27168	26156	23150	25970	9751	10082	6964	13017	1161	3980	490	8	11	3
d__Bacteria	k__norank	p__Proteobacteria	c__Gammaproteobacteria	o__unclassified_c__Gammaproteobacteria	f__unclassified_c__Gammaproteobacteria	g__unclassified_c__Gammaproteobacteria	s__unclassified_c__Gammaproteobacteria	OTU1225	0	0	0	0	0	0	0	0	0	0	0	0	0	0	0	0	0	0	0	0	0	0	0	0	0	0	0	0	0	0	0	0	0	0	0	0	0	0	0	0	0
d__Bacteria	k__norank	p__Actinobacteria	c__Actinobacteria	o__Micrococcales	f__Micrococcaceae	g__Rothia	s__unclassified_g__Rothia	OTU706	0	0	0	0	0	1	0	0	0	6	1	0	0	0	0	0	0	2	1	0	0	0	0	0	0	0	0	0	0	0	1	2	0	0	0	13	4	0	0	0	0
d__Bacteria	k__norank	p__Proteobacteria	c__Epsilonproteobacteria	o__Campylobacterales	f__Campylobacteraceae	g__Arcobacter	s__Arcobacter_butzleri	OTU825	0	0	0	0	0	0	0	0	1	0	0	0	0	0	0	0	0	0	0	0	1	0	0	0	0	0	0	0	0	0	0	0	0	0	0	0	0	0	0	0	0
d__Bacteria	k__norank	p__Firmicutes	c__Bacilli	o__Lactobacillales	f__Streptococcaceae	g__Lactococcus	s__Lactococcus_piscium	OTU184	0	0	0	0	0	0	0	0	3	0	0	0	2	0	0	0	1	0	0	0	0	0	0	0	0	0	0	0	0	0	0	0	0	0	0	0	0	0	0	0	0
d__Bacteria	k__norank	p__Firmicutes	c__Bacilli	o__Lactobacillales	f__unclassified_o__Lactobacillales	g__unclassified_o__Lactobacillales	s__unclassified_o__Lactobacillales	OTU50	0	0	0	5	0	8	0	20	1	245	351	15	0	0	0	4	0	86	664	173	0	0	0	0	0	0	0	0	0	0	0	0	0	0	0	20	0	3	0	1	0
d__Bacteria	k__norank	p__Actinobacteria	c__Actinobacteria	o__Micrococcales	f__Micrococcaceae	g__Rothia	s__unclassified_g__Rothia	OTU19	0	0	8	3	0	628	6	16	0	351	56	64	0	0	0	21	48	219	18	4	0	0	0	0	0	0	0	0	1	0	548	151	21	18	4	765	11	6	0	0	0
d__Bacteria	k__norank	p__Firmicutes	c__Bacilli	o__Lactobacillales	f__Streptococcaceae	g__Lactococcus	s__Lactococcus_plantarum	OTU1041	22	3	120	1	193	0	0	1	78	1	1	0	135	1	1	0	217	0	0	0	169	0	0	0	0	7	0	1	1	2	0	0	0	6	2	0	0	0	211	167	153
d__Bacteria	k__norank	p__Proteobacteria	c__Alphaproteobacteria	o__Caulobacterales	f__Caulobacteraceae	g__Brevundimonas	s__Brevundimonas_diminuta	OTU827	0	1	2	0	2	0	0	0	0	0	0	0	4	0	0	0	0	0	0	0	0	0	0	0	1	0	0	0	0	0	0	0	0	0	0	0	0	0	0	0	0
d__Bacteria	k__norank	p__Proteobacteria	c__Betaproteobacteria	o__Burkholderiales	f__Comamonadaceae	g__unclassified_f__Comamonadaceae	s__unclassified_f__Comamonadaceae	OTU751	0	1	4	0	4	0	0	0	3	0	0	0	7	0	0	0	8	0	0	0	9	0	0	0	0	0	0	0	1	0	0	0	0	0	0	0	0	0	4	7	4
d__Bacteria	k__norank	p__Firmicutes	c__Bacilli	o__Lactobacillales	f__Streptococcaceae	g__Streptococcus	s__unclassified_g__Streptococcus	OTU420	0	0	3	0	0	0	0	0	0	0	0	0	2	0	0	0	0	0	0	0	0	0	0	0	5	0	0	0	0	1	0	1	0	0	1	0	0	0	0	3	2
d__Bacteria	k__norank	p__Proteobacteria	c__Betaproteobacteria	o__Burkholderiales	f__Burkholderiaceae	g__Cupriavidus	s__unclassified_g__Cupriavidus	OTU495	0	1	0	0	0	0	0	0	0	0	0	0	3	0	0	0	0	0	0	0	2	0	0	0	0	0	0	0	0	0	0	1	0	5	0	0	0	0	4	1	1
d__Bacteria	k__norank	p__Proteobacteria	c__Gammaproteobacteria	o__Pseudomonadales	f__Moraxellaceae	g__Psychrobacter	s__Psychrobacter_sanguinis	OTU525	20	7	114	0	146	1	1	0	79	0	0	0	94	0	0	0	185	3	0	0	162	0	0	0	0	11	0	4	0	0	0	0	0	2	0	0	0	0	170	140	145
d__Bacteria	k__norank	p__Firmicutes	c__Bacilli	o__Lactobacillales	f__Aerococcaceae	g__Facklamia	s__uncultured_bacterium_g__Facklamia	OTU772	0	0	4	0	4	0	0	0	3	0	0	0	2	0	0	0	1	0	0	0	3	0	0	0	0	0	0	0	0	0	1	0	0	0	0	0	0	0	3	3	3
d__Bacteria	k__norank	p__Firmicutes	c__Clostridia	o__Clostridiales	f__Ruminococcaceae	g__Ruminococcaceae_UCG-005	s__unclassified_g__Ruminococcaceae_UCG-005	OTU771	0	0	1	0	1	0	0	0	1	0	0	0	1	0	0	0	2	0	0	0	1	0	0	0	0	0	0	0	0	0	0	0	0	0	0	0	0	0	3	2	3
d__Bacteria	k__norank	p__Firmicutes	c__Bacilli	o__Bacillales	f__Staphylococcaceae	g__Staphylococcus	s__unclassified_g__Staphylococcus	OTU487	0	28	0	0	0	0	0	0	0	4	0	0	0	0	0	0	0	0	28	0	0	0	0	0	0	0	2	0	9	0	14	1	0	0	0	11	0	0	0	0	0
d__Bacteria	k__norank	p__Firmicutes	c__Bacilli	o__Lactobacillales	f__Streptococcaceae	g__Lactococcus	s__Lactococcus_piscium	OTU1014	0	2	10	0	78	0	0	0	6	0	0	0	13	0	0	0	1	0	0	0	50	0	0	0	0	1	1	0	0	0	0	0	0	0	0	0	0	0	6	9	31
d__Bacteria	k__norank	p__Firmicutes	c__Bacilli	o__Lactobacillales	f__Streptococcaceae	g__Lactococcus	s__Lactococcus_piscium	OTU204	1	0	5	0	12	0	0	0	3	0	0	0	5	0	0	0	3	0	0	0	1	0	0	0	0	1	0	0	0	0	0	0	0	0	0	0	0	0	2	1	3
d__Bacteria	k__norank	p__Firmicutes	c__Bacilli	o__Bacillales	f__Staphylococcaceae	g__Staphylococcus	s__unclassified_g__Staphylococcus	OTU449	0	2	0	0	0	0	0	0	0	0	0	0	0	0	0	0	0	0	1	0	0	0	0	0	0	0	0	0	0	0	1	0	0	0	0	3	0	0	0	0	0
d__Bacteria	k__norank	p__Firmicutes	c__Bacilli	o__Bacillales	f__Staphylococcaceae	g__Staphylococcus	s__unclassified_g__Staphylococcus	OTU446	0	0	0	0	0	0	0	0	0	0	0	0	0	0	0	0	0	0	0	0	0	0	0	0	0	0	0	0	0	0	0	1	0	0	0	2	0	0	0	0	0
d__Bacteria	k__norank	p__Actinobacteria	c__Actinobacteria	o__Corynebacteriales	f__Corynebacteriaceae	g__Corynebacterium_1	s__Corynebacterium_tuberculostearicum	OTU630	0	1	14	0	0	0	0	0	0	1	0	0	0	0	0	0	0	0	0	0	1	0	0	0	0	0	0	0	0	0	0	0	0	2	1	0	0	0	0	2	1
d__Bacteria	k__norank	p__Proteobacteria	c__Gammaproteobacteria	o__Pseudomonadales	f__Moraxellaceae	g__Psychrobacter	s__unclassified_g__Psychrobacter	OTU1235	16	3	48	0	69	1	0	0	32	1	1	0	50	0	0	0	76	2	0	0	63	0	0	0	0	1	0	0	0	0	0	0	0	0	0	0	0	0	63	55	66
d__Bacteria	k__norank	p__Firmicutes	c__Clostridia	o__Clostridiales	f__Peptostreptococcaceae	g__Peptoclostridium	s__unclassified_g__Peptoclostridium	OTU718	2	1	110	1	2	0	289	1917	3	1	7280	5428	1	1	1	9	1	0	0	7697	14	2	0	0	0	4	0	1	0	0	0	16226	14069	15	0	2000	303	90	1	0	0
d__Bacteria	k__norank	p__Firmicutes	c__Bacilli	o__Lactobacillales	f__Streptococcaceae	g__Lactococcus	s__Lactococcus_piscium	OTU1069	90	24	809	1	2453	11	1	1	420	8	1	8	803	3	0	0	367	3	0	1	2278	3	0	0	10	71	6	5	24	53	6	5	0	118	9	0	1	0	541	881	1515
d__Bacteria	k__norank	p__Proteobacteria	c__Gammaproteobacteria	o__Pseudomonadales	f__Moraxellaceae	g__Psychrobacter	s__unclassified_g__Psychrobacter	OTU870	19	5	67	0	117	0	0	0	43	1	0	0	81	0	0	0	84	2	0	0	80	0	0	0	0	10	0	1	4	2	2	0	0	2	1	0	0	0	91	71	56
d__Bacteria	k__norank	p__Firmicutes	c__Bacilli	o__Lactobacillales	f__Streptococcaceae	g__Lactococcus	s__Lactococcus_raffinolactis	OTU288	4	2	46	0	62	0	0	0	33	0	0	0	41	0	0	0	119	0	0	0	56	0	0	0	0	2	0	0	0	1	0	0	0	0	1	0	0	0	138	59	128
d__Bacteria	k__norank	p__Firmicutes	c__Bacilli	o__Bacillales	f__Staphylococcaceae	g__Staphylococcus	s__unclassified_g__Staphylococcus	OTU444	0	638	10	0	0	0	0	0	0	20	4	0	0	0	0	0	6	0	212	0	0	0	1	1	1	1	1	0	85	8	143	6	0	1	0	439	6	0	1	0	4
d__Bacteria	k__norank	p__Proteobacteria	c__Betaproteobacteria	o__Burkholderiales	f__Oxalobacteraceae	g__Janthinobacterium	s__unclassified_g__Janthinobacterium	OTU84	35	9	148	0	222	2	0	1	76	4	0	0	166	0	0	0	182	6	0	1	205	1	0	0	0	8	0	2	1	1	0	0	0	3	1	1	0	0	249	151	112
d__Bacteria	k__norank	p__Bacteroidetes	c__Flavobacteriia	o__Flavobacteriales	f__Flavobacteriaceae	g__Flavobacterium	s__Flavobacterium_hercynium	OTU821	3	2	15	0	20	0	0	0	7	0	0	0	11	0	0	0	16	0	0	0	27	0	0	0	0	1	0	0	0	0	0	0	0	0	0	0	0	0	16	9	21
d__Bacteria	k__norank	p__Bacteroidetes	c__Bacteroidia	o__Bacteroidales	f__Prevotellaceae	g__Prevotella_9	s__uncultured_bacterium_g__Prevotella_9	OTU396	0	0	0	0	1	0	0	0	1	0	0	1	0	0	0	0	0	0	0	0	0	0	0	0	0	0	0	0	1	13	0	3	0	3	0	0	0	0	0	0	0
d__Bacteria	k__norank	p__Actinobacteria	c__Actinobacteria	o__Micrococcales	f__Micrococcaceae	g__Nesterenkonia	s__Nesterenkonia_sp._MY13	OTU75	1	0	2	0	0	1	0	0	1	0	0	0	1	0	0	0	2	0	0	0	1	0	0	0	0	0	0	0	0	0	0	0	0	0	0	0	0	0	2	2	1
d__Bacteria	k__norank	p__Proteobacteria	c__Alphaproteobacteria	o__Rhizobiales	f__Rhizobiaceae	g__Rhizobium	s__unclassified_g__Rhizobium	OTU329	0	0	0	0	0	0	0	0	0	0	0	0	2	0	0	0	2	1	0	0	0	0	0	0	0	0	0	0	0	0	0	0	0	6	0	0	0	0	1	4	1
d__Bacteria	k__norank	p__Bacteroidetes	c__Flavobacteriia	o__Flavobacteriales	f__Flavobacteriaceae	g__Chryseobacterium	s__uncultured_Bacteroidetes_bacterium_g__Chryseobacterium	OTU346	0	1	1	0	3	0	0	0	0	0	0	0	1	0	0	0	0	0	0	0	2	0	0	0	1	0	0	0	1	0	0	0	0	0	0	0	0	0	3	4	0
d__Bacteria	k__norank	p__Proteobacteria	c__Gammaproteobacteria	o__Pseudomonadales	f__Pseudomonadaceae	g__Pseudomonas	s__Pseudomonas_fragi	OTU978	0	0	0	0	1	0	0	0	0	0	0	0	3	0	0	0	4	0	0	0	2	0	0	0	0	1	0	0	0	0	0	0	0	0	0	0	0	0	0	2	0
d__Bacteria	k__norank	p__Firmicutes	c__Bacilli	o__Lactobacillales	f__Streptococcaceae	g__Streptococcus	s__Streptococcus_salivarius_subsp._salivarius	OTU714	4	3	103	13	58	16	135	268	28	2	1974	3225	32	1	0	0	60	13	8091	3745	55	0	0	1	4	1	2	1	3	4	1	0	0	17	1	1	1	25	68	34	45
d__Bacteria	k__norank	p__Firmicutes	c__Bacilli	o__Lactobacillales	f__Streptococcaceae	g__Lactococcus	s__Lactococcus_piscium	OTU590	0	0	3	0	7	0	0	0	1	0	0	0	8	0	0	0	4	0	0	0	7	0	0	0	0	0	0	0	0	0	0	0	0	0	0	0	0	0	3	7	5
d__Bacteria	k__norank	p__Actinobacteria	c__Actinobacteria	o__Propionibacteriales	f__Propionibacteriaceae	g__Propionibacterium	s__Propionibacterium_acnes_subsp._acnes_g__Propionibacterium	OTU108	0	0	5	0	2	0	0	0	1	0	0	0	4	0	0	0	1	0	0	0	2	0	0	0	0	0	0	0	8	1	0	0	0	5	1	0	0	0	3	2	7
d__Bacteria	k__norank	p__Firmicutes	c__Bacilli	o__Bacillales	f__Bacillaceae	g__Bacillus	s__Bacillus_badius_g__Bacillus	OTU868	0	0	0	0	0	0	0	0	0	0	0	0	0	0	0	0	0	0	0	0	0	0	0	0	0	0	0	0	0	0	0	0	0	0	0	0	0	0	0	0	0
d__Bacteria	k__norank	p__Proteobacteria	c__Betaproteobacteria	o__Burkholderiales	f__Comamonadaceae	g__Delftia	s__unclassified_g__Delftia	OTU45	0	0	5	0	8	0	0	0	3	0	0	0	7	0	0	0	9	0	0	0	3	0	0	0	0	1	0	1	0	0	0	0	0	0	0	0	0	0	7	5	6
d__Bacteria	k__norank	p__Firmicutes	c__Bacilli	o__Lactobacillales	f__Streptococcaceae	g__Lactococcus	s__unclassified_g__Lactococcus	OTU325	150	30	941	2	1346	10	0	5	521	17	2	5	1058	4	1	2	1329	15	1	5	1326	1	0	0	14	55	5	7	61	55	4	3	1	156	18	4	0	0	1330	938	1028
d__Bacteria	k__norank	p__Firmicutes	c__Bacilli	o__Bacillales	f__Staphylococcaceae	g__Staphylococcus	s__unclassified_g__Staphylococcus	OTU415	0	2	0	0	0	0	0	0	0	0	1	0	0	0	0	0	0	0	0	0	0	0	1	0	0	0	0	0	0	0	0	0	0	0	0	49	0	0	0	0	0
d__Bacteria	k__norank	p__Proteobacteria	c__Betaproteobacteria	o__Neisseriales	f__Neisseriaceae	g__norank_f__Neisseriaceae	s__unclassified_g__norank_f__Neisseriaceae	OTU1234	0	0	0	0	0	0	0	0	1	0	0	0	0	0	0	0	0	0	0	0	0	0	0	0	0	0	0	0	0	0	0	0	0	0	0	0	0	0	0	2	0
d__Bacteria	k__norank	p__Firmicutes	c__Clostridia	o__Clostridiales	f__Clostridiaceae_1	g__Clostridium_sensu_stricto_1	s__unclassified_g__Clostridium_sensu_stricto_1	OTU765	0	0	0	0	0	0	0	0	0	0	0	0	0	0	0	0	0	0	0	0	0	0	0	0	0	0	0	0	0	0	0	0	5	0	0	0	32	79	0	0	0
d__Bacteria	k__norank	p__Firmicutes	c__Bacilli	o__Bacillales	f__Bacillaceae	g__Bacillus	s__Bacillus_humi	OTU720	0	0	0	0	1	0	0	0	0	0	0	0	0	0	0	0	0	0	0	0	0	0	0	0	0	0	0	0	1	0	0	0	0	2	0	0	0	0	0	0	0
d__Bacteria	k__norank	p__Saccharibacteria	c__norank_p__Saccharibacteria	o__norank_p__Saccharibacteria	f__norank_p__Saccharibacteria	g__norank_p__Saccharibacteria	s__unclassified_g__norank_p__Saccharibacteria	OTU945	0	0	0	0	0	0	0	0	0	0	0	0	0	0	0	0	2	0	0	0	0	0	0	0	0	0	0	0	0	0	0	0	0	0	0	0	0	0	0	0	0
d__Bacteria	k__norank	p__Proteobacteria	c__Gammaproteobacteria	o__Enterobacteriales	f__Enterobacteriaceae	g__unclassified_f__Enterobacteriaceae	s__unclassified_f__Enterobacteriaceae	OTU51	3	0	4	916	8	0	166	295	3	0	216	92	4	18	21	96	1	0	0	825	2	9	10	14	0	1	0	0	0	2	0	0	1	17	6	6	5	2	2	2	0
d__Bacteria	k__norank	p__Proteobacteria	c__Gammaproteobacteria	o__Pseudomonadales	f__Moraxellaceae	g__Acinetobacter	s__unclassified_g__Acinetobacter	OTU1105	10	4	46	19	61	1	1	0	29	1	138	7	24	0	3	0	73	0	0	0	137	0	0	0	0	2	0	0	0	1	0	0	0	0	0	0	0	0	60	68	14
d__Bacteria	k__norank	p__Firmicutes	c__Bacilli	o__Bacillales	f__Bacillaceae	g__Oceanobacillus	s__Oceanobacillus_profundus_g__Oceanobacillus	OTU734	1	0	2	0	3	0	0	0	1	0	0	0	1	0	0	0	1	0	0	0	1	0	0	0	3	0	1	0	5	10	0	1	1	17	3	4	0	0	2	0	5
d__Bacteria	k__norank	p__Saccharibacteria	c__norank_p__Saccharibacteria	o__norank_p__Saccharibacteria	f__norank_p__Saccharibacteria	g__norank_p__Saccharibacteria	s__unclassified_g__norank_p__Saccharibacteria	OTU270	0	0	0	0	1	0	0	0	0	0	0	0	1	0	0	1	1	0	0	0	0	0	0	0	0	0	0	0	0	0	0	0	0	1	0	0	0	0	0	1	1
d__Bacteria	k__norank	p__Proteobacteria	c__Alphaproteobacteria	o__Rhizobiales	f__Aurantimonadaceae	g__Martelella	s__Martelella_mediterranea	OTU136	0	0	0	0	0	0	0	0	0	0	0	0	0	0	0	0	0	0	0	0	0	0	0	0	0	0	0	0	0	0	0	0	0	0	0	0	0	0	0	0	0
d__Bacteria	k__norank	p__Firmicutes	c__Bacilli	o__Lactobacillales	f__Enterococcaceae	g__Enterococcus	s__unclassified_g__Enterococcus	OTU705	0	0	0	1	0	0	0	0	0	0	0	0	0	2	6	2	0	0	0	8	0	1	16	13	0	0	0	0	0	0	0	0	2	2	9	11	15	2	0	0	0
d__Bacteria	k__norank	p__Actinobacteria	c__Actinobacteria	o__Nitriliruptorales	f__Nitriliruptoraceae	g__unclassified_f__Nitriliruptoraceae	s__unclassified_f__Nitriliruptoraceae	OTU36	4	0	52	0	19	0	0	0	11	0	0	0	60	0	0	0	29	1	0	0	24	0	0	0	0	0	0	1	0	0	0	0	0	0	0	0	0	0	15	28	37
d__Bacteria	k__norank	p__Firmicutes	c__Bacilli	o__Lactobacillales	f__Streptococcaceae	g__Streptococcus	s__unclassified_g__Streptococcus	OTU463	0	0	1	0	0	0	0	0	0	1	0	0	2	0	0	0	0	0	0	0	0	0	0	0	0	0	0	0	0	1	0	0	0	0	0	0	0	0	0	1	2
d__Bacteria	k__norank	p__Proteobacteria	c__Gammaproteobacteria	o__Pseudomonadales	f__Moraxellaceae	g__Acinetobacter	s__unclassified_g__Acinetobacter	OTU750	3	2	20	0	33	0	0	0	8	0	1	0	8	0	0	0	24	2	0	0	71	0	0	0	0	1	0	0	0	3	0	0	0	3	0	0	0	0	32	40	33
d__Bacteria	k__norank	p__Firmicutes	c__Bacilli	o__Bacillales	f__Bacillaceae	g__Bacillus	s__unclassified_g__Bacillus	OTU728	0	0	1	0	0	0	0	0	0	0	0	0	2	0	0	0	0	0	0	0	5	0	0	0	3	0	3	0	15	14	0	0	0	35	6	0	0	0	3	2	2
d__Bacteria	k__norank	p__Bacteroidetes	c__Flavobacteriia	o__Flavobacteriales	f__Flavobacteriaceae	g__Chryseobacterium	s__unclassified_g__Chryseobacterium	OTU379	0	0	2	0	1	0	0	0	1	0	0	0	2	0	0	0	0	0	0	0	4	0	0	0	0	0	0	0	0	0	0	0	0	0	0	0	0	0	5	3	5
d__Bacteria	k__norank	p__Firmicutes	c__Bacilli	o__Bacillales	f__Family_XII_o__Bacillales	g__Exiguobacterium	s__Exiguobacterium_sp._AT1b	OTU731	0	0	0	0	0	0	0	0	0	0	0	0	0	0	0	0	0	0	0	0	0	0	0	0	11	0	0	0	6	12	0	1	0	28	6	0	0	0	3	0	0
d__Bacteria	k__norank	p__Proteobacteria	c__Alphaproteobacteria	o__Sphingomonadales	f__Sphingomonadaceae	g__Sphingomonas	s__unclassified_g__Sphingomonas	OTU833	2	0	1	0	2	0	0	0	1	0	0	0	0	0	0	0	3	0	0	0	1	0	0	0	1	1	0	0	1	1	0	0	0	9	0	0	0	0	1	4	0
d__Bacteria	k__norank	p__Proteobacteria	c__Gammaproteobacteria	o__Pseudomonadales	f__Moraxellaceae	g__Acinetobacter	s__unclassified_g__Acinetobacter	OTU78	32	5	139	0	129	1	0	0	32	1	0	0	33	0	0	0	115	1	0	0	237	0	0	0	0	13	0	0	0	2	3	0	0	2	0	0	0	0	209	184	42
d__Bacteria	k__norank	p__Firmicutes	c__Bacilli	o__Lactobacillales	f__Streptococcaceae	g__Streptococcus	s__unclassified_g__Streptococcus	OTU228	11	2	61	0	91	0	1	0	34	1	0	0	62	0	0	0	92	0	0	0	107	0	0	0	0	5	0	1	0	1	0	0	0	0	0	0	0	0	97	59	70
d__Bacteria	k__norank	p__Firmicutes	c__Bacilli	o__Lactobacillales	f__Streptococcaceae	g__Lactococcus	s__Lactococcus_piscium	OTU616	6	0	60	0	5	0	0	0	1	0	0	0	4	0	0	0	11	0	0	0	43	0	0	0	1	0	0	0	0	0	0	0	0	0	0	0	0	0	6	57	14
d__Bacteria	k__norank	p__Firmicutes	c__Bacilli	o__Bacillales	f__Paenibacillaceae	g__Paenibacillus	s__unclassified_g__Paenibacillus	OTU404	0	0	0	0	0	0	0	0	0	0	0	0	0	0	0	0	0	0	0	0	0	0	0	0	0	0	0	0	0	0	0	0	0	0	0	0	0	0	0	0	0
d__Bacteria	k__norank	p__Proteobacteria	c__Gammaproteobacteria	o__Pseudomonadales	f__Pseudomonadaceae	g__Pseudomonas	s__unclassified_g__Pseudomonas	OTU803	3	1	14	0	12	0	0	0	6	0	0	0	17	0	0	0	9	0	0	0	13	0	0	0	1	1	0	0	0	1	0	0	0	10	0	0	0	0	13	12	15
d__Bacteria	k__norank	p__Proteobacteria	c__Gammaproteobacteria	o__Pseudomonadales	f__Pseudomonadaceae	g__Pseudomonas	s__unclassified_g__Pseudomonas	OTU801	0	0	2	0	11	0	0	0	2	0	1	0	6	0	0	0	1	0	0	0	4	0	0	0	0	0	0	0	0	0	0	0	0	0	0	0	0	0	5	1	2
d__Bacteria	k__norank	p__Actinobacteria	c__Actinobacteria	o__Micrococcales	f__Micrococcaceae	g__Paeniglutamicibacter	s__Paeniglutamicibacter_sulfureus	OTU112	1	0	5	0	1	0	0	0	2	0	0	0	0	0	0	0	2	0	0	0	3	0	0	0	1	0	0	0	0	0	0	0	0	0	0	0	0	0	4	3	0
d__Bacteria	k__norank	p__Firmicutes	c__Bacilli	o__Bacillales	f__Planococcaceae	g__Psychrobacillus	s__uncultured_bacterium_g__Psychrobacillus	OTU246	0	0	0	0	0	0	0	0	0	0	0	0	0	0	0	0	1	0	0	0	0	0	0	0	0	0	0	0	0	1	0	0	0	1	0	0	0	0	0	2	0
d__Bacteria	k__norank	p__Proteobacteria	c__Alphaproteobacteria	o__Caulobacterales	f__Caulobacteraceae	g__Brevundimonas	s__Brevundimonas_bullata	OTU47	1	0	1	0	7	0	0	0	2	0	0	0	7	0	0	0	1	0	0	0	4	0	0	0	0	0	0	0	1	0	0	0	0	0	0	0	0	0	4	4	4
d__Bacteria	k__norank	p__Firmicutes	c__Bacilli	o__Bacillales	f__Planococcaceae	g__Solibacillus	s__Solibacillus_silvestris_StLB046	OTU401	1	0	8	0	6	0	0	0	5	0	0	0	8	0	0	0	10	0	0	0	8	0	0	0	37	0	8	0	105	122	0	9	0	350	28	9	2	0	4	5	6
d__Bacteria	k__norank	p__Firmicutes	c__Bacilli	o__Lactobacillales	f__Enterococcaceae	g__Enterococcus	s__unclassified_g__Enterococcus	OTU724	33	39	37	1479	15	26244	167	461	16301	20441	9790	242	17	2	6	875	7	21294	10598	1303	18	3	1	3	16	18	54	44	47	45	16	10	15	11	21	672	152	224	20	2	4
d__Bacteria	k__norank	p__Firmicutes	c__Bacilli	o__Lactobacillales	f__Streptococcaceae	g__Lactococcus	s__Lactococcus_piscium	OTU878	5	0	2	0	10	0	0	0	1	0	0	0	7	0	0	0	6	0	0	0	11	0	0	0	0	0	0	0	0	0	0	0	0	1	0	0	0	0	9	5	3
d__Bacteria	k__norank	p__Actinobacteria	c__Actinobacteria	o__Corynebacteriales	f__Corynebacteriaceae	g__Corynebacterium_1	s__Corynebacterium_tuberculostearicum	OTU1184	0	8	68	1	0	1	0	0	0	4	1	0	0	0	0	0	0	0	0	0	5	0	0	0	1	0	0	0	0	2	0	0	0	1	1	0	0	0	2	14	3
d__Bacteria	k__norank	p__Firmicutes	c__Bacilli	o__Lactobacillales	f__unclassified_o__Lactobacillales	g__unclassified_o__Lactobacillales	s__unclassified_o__Lactobacillales	OTU691	0	0	0	0	0	0	0	0	0	0	0	0	0	0	0	0	0	0	0	0	0	0	0	0	0	0	0	0	0	0	0	0	0	0	0	0	0	0	0	0	0
d__Bacteria	k__norank	p__Proteobacteria	c__Alphaproteobacteria	o__Rhodobacterales	f__Rhodobacteraceae	g__Paracoccus	s__unclassified_g__Paracoccus	OTU1110	0	0	0	0	2	0	0	0	1	0	0	0	1	0	0	0	1	0	0	0	3	0	0	0	0	0	0	0	0	0	0	0	0	1	0	0	0	0	0	1	1
d__Bacteria	k__norank	p__Proteobacteria	c__Epsilonproteobacteria	o__Campylobacterales	f__Helicobacteraceae	g__Helicobacter	s__Helicobacter_ganmani	OTU836	0	0	0	0	0	0	0	0	0	0	0	0	0	0	0	0	0	0	0	0	0	0	0	0	0	0	0	0	1	3	0	0	0	0	0	0	0	0	0	0	0
d__Bacteria	k__norank	p__Firmicutes	c__Bacilli	o__Lactobacillales	f__Streptococcaceae	g__Lactococcus	s__Lactococcus_piscium	OTU1078	0	0	3	0	10	0	0	0	1	0	0	0	1	0	0	0	2	1	0	0	4	0	0	0	0	0	0	0	0	0	0	0	0	0	0	0	0	0	6	5	5
d__Bacteria	k__norank	p__Actinobacteria	c__Actinobacteria	o__Micrococcales	f__Microbacteriaceae	g__unclassified_f__Microbacteriaceae	s__unclassified_f__Microbacteriaceae	OTU529	2	0	0	0	1	0	0	0	0	0	0	0	0	0	0	0	0	0	0	0	1	0	0	0	0	0	0	0	0	0	0	0	0	0	0	0	0	0	1	0	0
d__Bacteria	k__norank	p__Actinobacteria	c__Actinobacteria	o__Bifidobacteriales	f__Bifidobacteriaceae	g__Bifidobacterium	s__unclassified_g__Bifidobacterium	OTU343	1	0	0	0	0	0	0	0	0	0	0	0	3	0	0	0	0	0	0	0	0	0	0	0	0	0	0	0	0	0	0	0	0	0	0	0	0	0	0	2	2
d__Bacteria	k__norank	p__Bacteroidetes	c__Flavobacteriia	o__Flavobacteriales	f__Flavobacteriaceae	g__Flavobacterium	s__Flavobacterium_frigidarium	OTU1113	15	1	65	0	60	0	0	0	26	2	0	0	61	0	0	1	66	0	0	0	50	0	0	0	2	4	0	2	1	0	0	0	0	9	1	2	0	0	74	69	54
d__Bacteria	k__norank	p__Actinobacteria	c__Actinobacteria	o__Corynebacteriales	f__Corynebacteriaceae	g__Corynebacterium_1	s__Corynebacterium_suicordis	OTU798	0	0	0	0	0	0	0	0	1	0	0	0	0	0	0	0	0	0	0	0	0	0	0	0	0	0	0	0	0	0	0	0	0	0	0	0	0	0	0	0	0
d__Bacteria	k__norank	p__Proteobacteria	c__Betaproteobacteria	o__Burkholderiales	f__Burkholderiaceae	g__Ralstonia	s__Ralstonia_pickettii_g__Ralstonia	OTU1232	0	0	1	0	0	0	0	0	0	0	0	0	0	0	0	0	0	0	0	0	0	0	0	0	0	0	0	0	0	0	0	0	0	0	0	0	0	0	0	0	0
d__Bacteria	k__norank	p__Firmicutes	c__Bacilli	o__Lactobacillales	f__Streptococcaceae	g__Lactococcus	s__Lactococcus_piscium	OTU260	4	2	11	0	40	0	0	0	12	1	0	0	17	0	0	0	18	0	0	0	6	0	0	0	0	2	0	0	0	0	0	0	0	0	0	0	0	0	31	16	19
d__Bacteria	k__norank	p__Firmicutes	c__unclassified_p__Firmicutes	o__unclassified_p__Firmicutes	f__unclassified_p__Firmicutes	g__unclassified_p__Firmicutes	s__unclassified_p__Firmicutes	OTU65	0	0	0	0	0	0	0	5	0	0	31	3	0	0	0	0	0	0	0	32	0	0	0	0	0	0	0	0	0	0	0	299	324	0	0	26	17	1	0	0	0
d__Bacteria	k__norank	p__Firmicutes	c__Clostridia	o__Clostridiales	f__Family_XI_o__Clostridiales	g__Helcococcus	s__Helcococcus_ovis	OTU41	0	0	7	0	4	0	0	0	2	1	0	0	8	0	0	0	5	0	0	0	5	0	0	0	0	0	0	0	0	0	0	0	0	0	0	0	0	0	3	6	7
d__Bacteria	k__norank	p__Firmicutes	c__Negativicutes	o__Selenomonadales	f__Veillonellaceae	g__Veillonella	s__unclassified_g__Veillonella	OTU710	0	0	1	0	1	0	0	0	0	0	0	0	0	1	0	0	0	0	0	0	0	0	0	0	0	0	0	0	0	0	0	0	0	0	0	0	4837	1924	0	0	0
d__Bacteria	k__norank	p__Proteobacteria	c__Alphaproteobacteria	o__Rhodobacterales	f__Rhodobacteraceae	g__Paracoccus	s__unclassified_g__Paracoccus	OTU1074	0	0	0	0	0	0	0	0	0	0	0	0	0	0	0	0	0	0	0	0	0	0	0	0	0	0	0	0	0	0	0	0	0	0	0	0	0	0	0	0	0
d__Bacteria	k__norank	p__Bacteroidetes	c__Bacteroidia	o__Bacteroidales	f__Bacteroidaceae	g__Bacteroides	s__Bacteroides_acidifaciens	OTU146	0	0	0	0	0	0	0	0	0	0	0	0	0	0	0	0	0	0	0	0	0	0	0	0	0	0	0	0	0	2	0	0	0	5	0	0	0	0	0	0	0
d__Bacteria	k__norank	p__Proteobacteria	c__Gammaproteobacteria	o__Pseudomonadales	f__Moraxellaceae	g__Acinetobacter	s__Acinetobacter_baumannii_NIPH_60	OTU21	3	1	26	3	31	0	0	0	9	0	2	0	10	0	0	0	22	0	0	0	53	0	0	0	0	0	0	1	0	0	0	0	0	1	0	0	0	0	43	27	6
d__Bacteria	k__norank	p__Bacteroidetes	c__Flavobacteriia	o__Flavobacteriales	f__Flavobacteriaceae	g__Chryseobacterium	s__unclassified_g__Chryseobacterium	OTU333	8	2	20	0	33	0	0	0	12	1	0	0	32	0	0	0	36	1	0	0	35	0	0	0	0	3	0	0	0	0	0	0	0	0	0	0	0	0	36	22	24
d__Bacteria	k__norank	p__Proteobacteria	c__Gammaproteobacteria	o__Pseudomonadales	f__Moraxellaceae	g__Acinetobacter	s__unclassified_g__Acinetobacter	OTU685	0	0	1	2	0	0	0	0	0	0	11	0	0	0	4	0	0	0	0	0	0	0	0	0	0	0	0	0	0	0	0	0	0	0	0	0	0	0	0	0	0
d__Bacteria	k__norank	p__Actinobacteria	c__Actinobacteria	o__Micrococcales	f__Intrasporangiaceae	g__Janibacter	s__uncultured_organism_g__Janibacter	OTU4	1	0	0	0	0	0	0	0	0	0	0	0	0	0	0	0	0	0	0	0	2	0	0	0	0	1	0	0	0	0	0	0	0	0	0	0	0	0	0	4	0
d__Bacteria	k__norank	p__unclassified_k__norank	c__unclassified_k__norank	o__unclassified_k__norank	f__unclassified_k__norank	g__unclassified_k__norank	s__unclassified_k__norank	OTU709	0	0	0	0	0	0	0	0	0	0	0	0	0	0	0	0	0	0	0	0	0	0	0	0	0	0	0	0	0	0	0	0	0	0	0	0	8	9	0	0	0
d__Bacteria	k__norank	p__Bacteroidetes	c__Bacteroidia	o__Bacteroidales	f__Bacteroidaceae	g__Bacteroides	s__Bacteroides_sartorii	OTU352	0	0	0	0	0	0	0	0	0	0	0	0	0	0	0	0	0	0	0	0	0	0	0	0	0	0	0	0	1	3	0	0	0	0	0	0	0	0	0	0	0
d__Bacteria	k__norank	p__Proteobacteria	c__Gammaproteobacteria	o__Pseudomonadales	f__Moraxellaceae	g__Acinetobacter	s__Acinetobacter_towneri	OTU873	0	0	0	0	0	0	0	0	0	0	0	0	0	0	0	0	0	0	0	0	0	0	0	0	0	0	0	0	0	0	0	0	0	0	0	0	0	0	0	0	0
d__Bacteria	k__norank	p__Firmicutes	c__Bacilli	o__Bacillales	f__Staphylococcaceae	g__Macrococcus	s__Macrococcus_caseolyticus	OTU908	0	0	6	0	10	0	0	0	0	0	0	0	9	0	0	0	6	0	1	0	8	0	0	0	0	0	1	0	0	0	0	0	0	0	0	0	0	0	15	8	7
d__Bacteria	k__norank	p__Firmicutes	c__unclassified_p__Firmicutes	o__unclassified_p__Firmicutes	f__unclassified_p__Firmicutes	g__unclassified_p__Firmicutes	s__unclassified_p__Firmicutes	OTU788	0	0	0	0	0	0	0	16	1	0	104	2	0	0	0	0	0	0	0	38	0	0	0	0	0	0	0	0	0	0	0	4	13	0	0	11	2	0	0	0	0
d__Bacteria	k__norank	p__Firmicutes	c__Bacilli	o__Lactobacillales	f__Streptococcaceae	g__Lactococcus	s__Lactococcus_piscium	OTU297	1	1	6	0	7	0	0	0	2	0	0	0	2	0	0	0	1	0	0	0	10	0	0	0	0	0	0	0	0	0	0	0	0	1	0	0	0	0	3	7	4
d__Bacteria	k__norank	p__Proteobacteria	c__Gammaproteobacteria	o__Enterobacteriales	f__Enterobacteriaceae	g__Serratia	s__unclassified_g__Serratia	OTU1077	0	2	6	0	5	0	0	0	0	0	0	0	0	0	0	0	4	0	0	0	2	0	0	0	0	0	0	0	0	0	0	0	0	0	0	0	0	0	4	4	2
d__Bacteria	k__norank	p__Actinobacteria	c__Actinobacteria	o__Micrococcales	f__Microbacteriaceae	g__Microbacterium	s__Microbacterium_oxydans_g__Microbacterium	OTU815	0	0	0	0	1	0	0	0	0	0	0	0	1	0	0	0	0	0	0	0	0	0	0	0	0	2	0	0	0	0	0	0	0	0	0	0	0	0	0	0	1
d__Bacteria	k__norank	p__Firmicutes	c__Bacilli	o__Lactobacillales	f__Lactobacillaceae	g__Lactobacillus	s__unclassified_g__Lactobacillus	OTU532	2	0	4	0	1	0	0	0	0	0	0	0	0	0	0	0	7	0	0	0	6	0	0	0	0	0	0	0	0	0	0	0	0	0	0	0	0	0	2	5	0
d__Bacteria	k__norank	p__Firmicutes	c__Bacilli	o__Lactobacillales	f__unclassified_o__Lactobacillales	g__unclassified_o__Lactobacillales	s__unclassified_o__Lactobacillales	OTU6	0	0	0	0	0	0	0	0	0	0	0	2	0	11	0	0	0	3	272	51	0	6	2	4	122	0	46	55	11	10	2	18	3	0	0	31	6	8	0	0	0
d__Bacteria	k__norank	p__Proteobacteria	c__Gammaproteobacteria	o__Pseudomonadales	f__Pseudomonadaceae	g__Pseudomonas	s__unclassified_g__Pseudomonas	OTU450	5	0	13	0	23	0	0	0	8	0	0	0	10	0	0	0	21	1	0	0	12	0	0	0	0	0	0	0	0	0	0	0	0	0	0	0	0	0	20	9	12
d__Bacteria	k__norank	p__Proteobacteria	c__Betaproteobacteria	o__Burkholderiales	f__Comamonadaceae	g__Comamonas	s__Comamonas_koreensis	OTU524	2	0	12	0	12	1	0	0	1	0	0	0	10	0	0	0	6	0	0	0	10	0	0	0	0	1	0	0	0	0	0	0	0	0	0	0	0	0	10	14	9
d__Bacteria	k__norank	p__Firmicutes	c__Bacilli	o__Lactobacillales	f__Streptococcaceae	g__Lactococcus	s__unclassified_g__Lactococcus	OTU125	22	5	188	0	316	5	0	0	119	2	0	1	219	0	0	1	283	1	1	0	279	0	0	0	1	15	0	1	5	4	2	0	0	13	0	1	0	0	307	226	244
d__Bacteria	k__norank	p__Proteobacteria	c__Gammaproteobacteria	o__Enterobacteriales	f__Enterobacteriaceae	g__Serratia	s__unclassified_g__Serratia	OTU1021	27	5	101	1	191	3	0	0	68	1	0	0	109	1	0	0	174	2	0	0	211	0	0	0	0	12	1	0	0	1	0	0	0	5	0	0	0	0	172	133	90
d__Bacteria	k__norank	p__Proteobacteria	c__Gammaproteobacteria	o__Pseudomonadales	f__Moraxellaceae	g__Acinetobacter	s__unclassified_g__Acinetobacter	OTU63	5	2	32	0	33	2	0	1	15	0	0	0	9	0	0	0	26	4	0	0	78	0	0	0	0	2	0	1	0	0	1	0	0	0	0	0	0	0	46	43	12
d__Bacteria	k__norank	p__Proteobacteria	c__Betaproteobacteria	o__Burkholderiales	f__Comamonadaceae	g__Comamonas	s__unclassified_g__Comamonas	OTU1229	0	0	0	0	2	0	0	0	1	0	0	0	1	0	0	0	4	1	0	0	2	0	0	0	0	0	0	0	0	0	0	0	0	0	0	0	0	0	4	2	1
d__Bacteria	k__norank	p__Actinobacteria	c__Actinobacteria	o__Micrococcales	f__Microbacteriaceae	g__Pseudoclavibacter	s__Pseudoclavibacter_helvolus	OTU390	0	0	1	0	0	0	0	0	0	0	0	0	1	0	0	0	0	0	0	0	1	0	0	0	0	0	0	0	0	0	0	0	0	0	0	0	0	0	1	2	1
d__Bacteria	k__norank	p__Actinobacteria	c__Actinobacteria	o__Corynebacteriales	f__Corynebacteriaceae	g__Corynebacterium_1	s__Corynebacterium_tuberculostearicum	OTU610	0	0	7	0	0	0	0	0	0	0	0	0	0	0	0	0	0	0	0	0	0	0	0	0	0	0	0	0	0	2	0	0	0	2	1	0	0	0	0	0	0
d__Bacteria	k__norank	p__Firmicutes	c__Bacilli	o__Bacillales	f__Bacillaceae	g__Bacillus	s__unclassified_g__Bacillus	OTU1100	0	0	0	0	0	0	0	0	0	0	0	0	0	0	0	0	0	0	0	0	0	0	0	0	0	0	0	0	0	0	0	0	0	0	0	0	0	0	0	0	0
d__Bacteria	k__norank	p__Firmicutes	c__Negativicutes	o__Selenomonadales	f__Veillonellaceae	g__Veillonella	s__unclassified_g__Veillonella	OTU67	0	0	0	0	0	0	0	0	0	0	0	0	0	0	0	0	0	0	0	0	0	0	0	0	0	0	0	0	0	0	0	0	0	0	0	0	93	22	0	0	0
d__Bacteria	k__norank	p__Proteobacteria	c__Betaproteobacteria	o__Neisseriales	f__Neisseriaceae	g__Uruburuella	s__uncultured_bacterium_g__Uruburuella	OTU319	12	2	27	0	51	1	0	0	25	0	0	0	38	0	0	0	34	0	0	0	58	0	0	0	0	4	1	1	0	3	0	0	0	1	0	0	0	0	55	59	35
d__Bacteria	k__norank	p__Firmicutes	c__Bacilli	o__Lactobacillales	f__Streptococcaceae	g__Lactococcus	s__Lactococcus_piscium	OTU274	2	1	23	0	126	0	0	0	36	0	0	0	60	0	0	0	58	0	0	0	107	0	0	0	1	4	0	0	0	0	0	0	0	4	0	0	0	0	79	37	80
d__Bacteria	k__norank	p__Proteobacteria	c__Gammaproteobacteria	o__Pseudomonadales	f__Moraxellaceae	g__Psychrobacter	s__unclassified_g__Psychrobacter	OTU802	8	5	81	0	119	1	0	0	53	0	0	0	94	1	0	0	127	3	2	0	105	0	0	0	1	3	0	2	1	1	1	0	0	1	0	0	0	0	118	85	93
d__Bacteria	k__norank	p__Firmicutes	c__Bacilli	o__Bacillales	f__Bacillaceae	g__Bacillus	s__unclassified_g__Bacillus	OTU752	0	0	0	0	8	0	0	0	3	0	0	0	1	0	0	0	3	0	0	0	6	0	0	0	30	0	1	0	25	24	0	3	0	53	5	6	0	0	2	5	8
d__Bacteria	k__norank	p__Firmicutes	c__Clostridia	o__Clostridiales	f__Ruminococcaceae	g__Ruminiclostridium_9	s__uncultured_bacterium_g__Ruminiclostridium_9	OTU837	0	0	0	0	0	0	0	0	0	0	0	0	0	0	0	0	0	0	0	0	0	0	0	0	0	0	0	0	0	0	0	0	0	0	0	0	0	0	0	0	0
d__Bacteria	k__norank	p__Firmicutes	c__Bacilli	o__Lactobacillales	f__Streptococcaceae	g__Lactococcus	s__Lactococcus_piscium	OTU225	1	0	18	0	29	0	0	0	8	0	0	0	9	0	0	0	13	0	0	0	24	0	0	0	1	1	0	0	0	0	0	0	0	2	0	0	0	0	8	18	5
d__Bacteria	k__norank	p__Firmicutes	c__Bacilli	o__Bacillales	f__Staphylococcaceae	g__Staphylococcus	s__unclassified_g__Staphylococcus	OTU505	0	4	0	0	0	0	0	0	0	0	0	0	0	0	0	0	0	0	0	0	0	0	0	0	0	0	0	0	1	1	1	0	0	0	0	6	0	0	0	0	0
d__Bacteria	k__norank	p__Firmicutes	c__Bacilli	o__Bacillales	f__Staphylococcaceae	g__Staphylococcus	s__unclassified_g__Staphylococcus	OTU436	0	0	0	0	0	0	0	0	0	0	0	0	0	0	0	0	0	0	0	0	0	0	0	0	0	0	0	0	0	0	0	0	0	0	0	1	0	0	0	0	0
d__Bacteria	k__norank	p__Firmicutes	c__Bacilli	o__Bacillales	f__Staphylococcaceae	g__Staphylococcus	s__unclassified_g__Staphylococcus	OTU437	0	1	0	0	0	0	0	0	0	0	0	0	0	0	0	0	0	0	0	0	0	0	0	0	0	0	0	0	1	0	0	0	0	0	0	0	0	0	0	0	0
d__Bacteria	k__norank	p__Proteobacteria	c__Gammaproteobacteria	o__Enterobacteriales	f__Enterobacteriaceae	g__Klebsiella	s__unclassified_g__Klebsiella	OTU864	0	0	0	1	0	0	0	0	0	0	0	0	0	0	1	1	0	0	0	0	0	2	14	18	0	0	0	0	0	0	0	0	4	0	4	10	17	7	0	0	0
d__Bacteria	k__norank	p__Peregrinibacteria	c__Candidatus_Peribacteria	o__norank_c__Candidatus_Peribacteria	f__norank_c__Candidatus_Peribacteria	g__norank_c__Candidatus_Peribacteria	s__uncultured_organism_g__norank_c__Candidatus_Peribacteria	OTU717	0	0	0	0	0	0	0	0	0	0	0	0	0	0	0	0	0	0	0	0	0	0	0	0	0	0	0	0	0	0	0	0	0	0	0	0	0	0	0	0	0
d__Bacteria	k__norank	p__Proteobacteria	c__Gammaproteobacteria	o__Enterobacteriales	f__Enterobacteriaceae	g__Klebsiella	s__unclassified_g__Klebsiella	OTU862	1	1	27	19	7	1	389	87	1	2	42	321	1	2058	2264	1015	10	0	1	573	14	2231	2540	2380	3	0	1	0	5	1	0	0	103	1759	1445	1931	1386	618	0	1	3
d__Bacteria	k__norank	p__Firmicutes	c__Bacilli	o__Lactobacillales	f__Leuconostocaceae	g__Leuconostoc	s__Leuconostoc_lactis	OTU533	42	13	172	0	235	3	1	1	106	1	0	0	181	0	0	0	254	3	1	1	407	1	0	0	0	22	0	2	1	5	1	0	0	9	0	0	0	0	276	213	236
d__Bacteria	k__norank	p__Firmicutes	c__Bacilli	o__Lactobacillales	f__Enterococcaceae	g__Enterococcus	s__unclassified_g__Enterococcus	OTU389	1	0	0	3	0	0	1	2	0	1	14	3	0	1	3	0	0	2	0	10	0	6	9	13	1	0	1	0	1	2	1	66	91	1	9	10	67	12	0	0	0
d__Bacteria	k__norank	p__Firmicutes	c__Clostridia	o__Clostridiales	f__Peptostreptococcaceae	g__Peptoclostridium	s__unclassified_g__Peptoclostridium	OTU689	0	0	0	0	1	0	0	6	0	0	61	19	0	0	0	0	0	0	0	56	0	0	0	0	0	0	0	0	0	0	0	93	98	0	0	40	1	1	0	0	0
d__Bacteria	k__norank	p__Proteobacteria	c__Gammaproteobacteria	o__Enterobacteriales	f__Enterobacteriaceae	g__Escherichia-Shigella	s__unclassified_g__Escherichia-Shigella	OTU789	2	1	725	7	51	0	13154	20359	50	1	2	1	64	5	6	7	39	1	2	0	395	4	1	0	0	122	0	0	0	0	0	0	1	4	0	0	0	0	8	0	8
d__Bacteria	k__norank	p__unclassified_k__norank	c__unclassified_k__norank	o__unclassified_k__norank	f__unclassified_k__norank	g__unclassified_k__norank	s__unclassified_k__norank	OTU156	0	0	0	0	0	0	0	0	0	0	0	0	0	0	0	0	0	0	0	0	0	0	0	0	1	0	0	0	0	0	0	0	0	2	0	0	0	0	0	0	1
d__Bacteria	k__norank	p__Bacteroidetes	c__Bacteroidia	o__Bacteroidales	f__Prevotellaceae	g__Prevotella	s__Prevotella_timonensis	OTU832	0	0	0	0	0	0	0	0	0	0	0	0	0	0	0	0	0	0	0	0	0	0	0	0	0	0	0	0	0	0	0	0	0	0	0	0	0	0	0	0	0
d__Bacteria	k__norank	p__Bacteroidetes	c__Flavobacteriia	o__Flavobacteriales	f__Flavobacteriaceae	g__Chryseobacterium	s__Chryseobacterium_piscicola	OTU753	0	0	0	0	0	0	0	0	0	0	0	0	1	0	0	0	0	0	0	0	0	0	0	0	0	0	0	0	0	0	0	1	0	0	0	0	0	0	0	0	2
d__Bacteria	k__norank	p__Firmicutes	c__Bacilli	o__Lactobacillales	f__Streptococcaceae	g__Lactococcus	s__Lactococcus_piscium	OTU209	0	0	2	0	2	0	0	0	2	0	0	0	2	0	0	0	2	0	0	0	6	0	0	0	0	0	0	0	0	0	0	0	0	0	0	0	0	0	5	1	1
d__Bacteria	k__norank	p__Firmicutes	c__Clostridia	o__Clostridiales	f__Peptostreptococcaceae	g__Peptoclostridium	s__Peptoclostridium_difficile_g__Peptoclostridium	OTU740	0	0	0	0	0	0	1	24	0	0	75	26	0	0	0	0	0	0	0	65	0	0	0	0	0	0	0	0	0	0	0	780	664	0	0	105	9	4	0	0	0
d__Bacteria	k__norank	p__Firmicutes	c__Negativicutes	o__Selenomonadales	f__Veillonellaceae	g__Veillonella	s__Veillonella_atypica	OTU711	0	0	0	0	0	0	0	0	0	0	0	0	0	0	0	0	0	0	0	0	0	0	0	0	0	0	0	0	0	0	0	0	0	0	0	0	1853	770	0	0	0
d__Bacteria	k__norank	p__Fusobacteria	c__Fusobacteriia	o__Fusobacteriales	f__Leptotrichiaceae	g__Caviibacter	s__uncultured_bacterium_g__Caviibacter	OTU79	0	0	10	0	7	1	0	0	0	0	0	0	1	0	0	0	8	0	0	0	7	0	0	0	0	1	0	0	0	0	0	0	0	0	0	0	0	0	2	16	2
d__Bacteria	k__norank	p__Firmicutes	c__Negativicutes	o__Selenomonadales	f__Acidaminococcaceae	g__Phascolarctobacterium	s__uncultured_Veillonellaceae_bacterium_g__Phascolarctobacterium	OTU1239	0	0	1	0	2	0	0	0	0	0	0	0	0	0	0	0	1	1	0	0	1	0	0	0	0	0	0	0	0	0	0	0	0	0	0	0	0	0	6	0	0
d__Bacteria	k__norank	p__Firmicutes	c__Bacilli	o__Bacillales	f__Bacillaceae	g__Bacillus	s__Bacillus_simplex	OTU202	0	0	0	0	1	0	0	0	0	0	0	0	0	0	0	0	0	0	0	0	0	0	0	0	0	0	0	0	0	1	0	0	0	3	0	0	0	0	0	0	0
d__Bacteria	k__norank	p__Proteobacteria	c__Betaproteobacteria	o__Burkholderiales	f__Comamonadaceae	g__Comamonas	s__Comamonas_testosteroni_g__Comamonas	OTU383	0	0	2	0	0	0	0	0	1	0	0	0	1	0	0	0	0	0	0	0	1	0	0	0	0	0	0	0	0	0	0	0	0	0	0	0	0	0	0	0	0
d__Bacteria	k__norank	p__Firmicutes	c__Bacilli	o__Bacillales	f__Bacillaceae	g__Bacillus	s__unclassified_g__Bacillus	OTU743	0	0	3	0	8	0	0	0	3	0	0	0	8	0	0	0	5	0	0	0	5	0	0	0	10	1	2	0	22	29	0	0	0	77	6	2	0	0	9	5	4
d__Bacteria	k__norank	p__Proteobacteria	c__Gammaproteobacteria	o__Pseudomonadales	f__Pseudomonadaceae	g__Pseudomonas	s__unclassified_g__Pseudomonas	OTU86	364	59	1370	4	2110	22	4	3	903	33	2	1	1805	5	0	4	2298	36	8	2	1851	2	0	0	8	91	0	26	14	11	14	0	1	37	7	3	0	0	2257	1667	1765
d__Bacteria	k__norank	p__Proteobacteria	c__Alphaproteobacteria	o__Sphingomonadales	f__Sphingomonadaceae	g__Sphingomonas	s__Sphingomonas_paucimobilis_g__Sphingomonas	OTU704	0	0	1	0	0	0	0	0	0	0	0	0	0	0	0	0	0	0	0	0	0	0	0	0	0	0	0	1	0	0	0	0	0	0	0	0	0	0	0	0	1
d__Bacteria	k__norank	p__Firmicutes	c__Bacilli	o__Bacillales	f__Planococcaceae	g__Sporosarcina	s__Sporosarcina_luteola	OTU732	0	0	2	0	0	0	0	0	0	0	0	0	1	0	0	0	1	0	0	0	2	0	0	0	0	0	0	0	1	0	0	0	0	0	0	0	0	0	0	0	0
d__Bacteria	k__norank	p__Proteobacteria	c__Betaproteobacteria	o__Burkholderiales	f__Oxalobacteraceae	g__Massilia	s__unclassified_g__Massilia	OTU1237	0	0	0	0	0	0	0	0	0	0	0	0	0	0	0	0	0	0	0	0	5	0	0	0	0	0	0	0	0	0	0	0	0	0	0	0	0	0	0	0	1
d__Bacteria	k__norank	p__Proteobacteria	c__Gammaproteobacteria	o__Pseudomonadales	f__Pseudomonadaceae	g__Pseudomonas	s__unclassified_g__Pseudomonas	OTU956	0	0	0	0	0	0	0	0	0	0	0	0	0	0	0	0	0	0	0	0	0	0	0	0	0	0	0	0	0	0	0	0	0	0	0	0	0	0	0	0	0
d__Bacteria	k__norank	p__Firmicutes	c__Bacilli	o__Lactobacillales	f__Streptococcaceae	g__Lactococcus	s__unclassified_g__Lactococcus	OTU5	1	0	1	0	6	0	0	0	4	0	0	0	9	0	0	0	11	0	0	0	5	0	0	0	0	0	0	0	0	0	0	0	0	0	0	0	0	0	6	5	12
d__Bacteria	k__norank	p__Firmicutes	c__Bacilli	o__Lactobacillales	f__Streptococcaceae	g__Lactococcus	s__Lactococcus_piscium	OTU1139	0	0	0	0	0	0	0	0	2	0	0	0	2	0	0	0	3	0	0	0	0	0	0	0	0	0	0	0	0	0	0	0	0	0	0	0	0	0	1	2	0
d__Bacteria	k__norank	p__Firmicutes	c__Bacilli	o__Lactobacillales	f__Streptococcaceae	g__Streptococcus	s__unclassified_g__Streptococcus	OTU692	1	1	4	12	2	1	2	15	0	50	225	77	2	0	0	30	1	833	816	231	0	0	0	0	0	0	1	0	3	0	0	1	0	0	0	37	1	119	2	1	0
d__Bacteria	k__norank	p__Firmicutes	c__Bacilli	o__Lactobacillales	f__Streptococcaceae	g__Lactococcus	s__Lactococcus_piscium	OTU1135	0	0	2	0	2	0	0	0	0	0	0	0	3	0	0	0	10	0	0	0	6	0	0	0	0	0	0	0	0	0	0	0	0	0	0	0	0	0	11	3	26
d__Bacteria	k__norank	p__Proteobacteria	c__Alphaproteobacteria	o__Rhodospirillales	f__Acetobacteraceae	g__Acetobacter	s__unclassified_g__Acetobacter	OTU723	0	0	0	0	0	0	0	0	1	0	0	0	0	0	0	0	0	0	0	0	0	0	0	0	0	0	0	0	0	0	0	0	0	0	0	0	0	0	0	0	0
d__Bacteria	k__norank	p__Proteobacteria	c__Betaproteobacteria	o__Neisseriales	f__Neisseriaceae	g__norank_f__Neisseriaceae	s__unclassified_g__norank_f__Neisseriaceae	OTU151	0	0	0	0	0	0	0	0	0	0	0	0	0	0	0	0	0	0	0	0	0	0	0	0	0	0	0	0	0	0	0	0	0	0	0	0	0	0	0	0	1
d__Bacteria	k__norank	p__Proteobacteria	c__Gammaproteobacteria	o__Enterobacteriales	f__Enterobacteriaceae	g__unclassified_f__Enterobacteriaceae	s__unclassified_f__Enterobacteriaceae	OTU522	0	0	0	0	0	0	0	1	0	0	0	29	0	0	0	0	0	0	0	0	0	0	0	0	0	0	0	0	0	0	0	0	4	0	0	0	34	126	0	0	0
d__Bacteria	k__norank	p__unclassified_k__norank	c__unclassified_k__norank	o__unclassified_k__norank	f__unclassified_k__norank	g__unclassified_k__norank	s__unclassified_k__norank	OTU768	0	0	0	0	0	0	0	6	0	0	0	0	0	0	0	0	0	0	0	0	0	0	0	0	0	0	0	0	0	0	0	0	0	0	0	1	0	0	0	0	0
d__Bacteria	k__norank	p__Firmicutes	c__Clostridia	o__Clostridiales	f__Clostridiaceae_1	g__Clostridium_sensu_stricto_1	s__Clostridium_tertium	OTU770	0	0	0	0	0	0	0	0	0	0	0	0	0	0	0	0	0	0	0	0	1	1	0	0	0	0	0	2	0	0	0	0	0	0	0	0	0	0	1	0	1
d__Bacteria	k__norank	p__Actinobacteria	c__Actinobacteria	o__Corynebacteriales	f__Corynebacteriaceae	g__Corynebacterium_1	s__Corynebacterium_tuberculostearicum	OTU1192	0	6	35	0	0	0	0	0	0	2	0	0	0	0	0	0	1	0	0	0	0	0	0	0	0	0	0	0	0	1	0	0	0	3	0	0	0	0	1	3	2
d__Bacteria	k__norank	p__Actinobacteria	c__Actinobacteria	o__Corynebacteriales	f__Corynebacteriaceae	g__Lawsonella	s__uncultured_organism_g__Lawsonella	OTU338	0	0	2	0	1	0	0	0	1	0	0	0	0	0	0	0	2	0	0	0	4	0	0	0	1	0	0	0	1	3	0	0	0	0	0	0	0	0	3	2	0
d__Bacteria	k__norank	p__Firmicutes	c__Clostridia	o__Clostridiales	f__Ruminococcaceae	g__Ruminiclostridium	s__uncultured_bacterium_g__Ruminiclostridium	OTU1207	0	0	0	0	0	0	0	0	0	0	0	0	0	0	0	0	0	0	0	0	0	0	0	0	0	0	0	0	0	0	0	0	0	0	0	0	0	0	0	0	0
d__Bacteria	k__norank	p__Proteobacteria	c__Gammaproteobacteria	o__Oceanospirillales	f__Halomonadaceae	g__Halomonas	s__Halomonas_nitritophilus	OTU3	7	0	33	0	49	0	0	0	16	1	0	0	36	0	0	0	50	0	0	0	65	0	0	0	0	1	0	1	0	0	0	0	0	0	0	0	0	0	38	15	44
d__Bacteria	k__norank	p__Proteobacteria	c__Gammaproteobacteria	o__Enterobacteriales	f__Enterobacteriaceae	g__Serratia	s__unclassified_g__Serratia	OTU867	1	0	15	0	24	0	0	0	11	1	0	0	23	0	0	0	12	0	0	1	25	0	0	0	0	0	0	0	0	1	0	0	0	1	0	0	0	0	11	15	13
d__Bacteria	k__norank	p__Proteobacteria	c__Gammaproteobacteria	o__Pseudomonadales	f__Pseudomonadaceae	g__Pseudomonas	s__Pseudomonas_sp._L10.10	OTU885	42	12	176	0	384	5	0	0	125	8	1	0	337	0	0	0	354	9	1	0	334	0	0	0	0	9	0	5	11	9	1	1	0	14	0	1	0	0	317	251	252
d__Bacteria	k__norank	p__Firmicutes	c__Bacilli	o__Lactobacillales	f__Streptococcaceae	g__norank_f__Streptococcaceae	s__uncultured_bacterium_g__norank_f__Streptococcaceae	OTU819	0	0	48	0	0	1	0	3	0	12	1	1	73	17	0	0	1	6	5	1	1	1	0	0	7	0	0	2	0	4	0	0	0	0	1	2	1	0	0	8	48
d__Bacteria	k__norank	p__Proteobacteria	c__Gammaproteobacteria	o__Pseudomonadales	f__Moraxellaceae	g__Acinetobacter	s__unclassified_g__Acinetobacter	OTU55	1	1	3	0	5	0	1	0	2	0	0	0	3	0	0	0	3	0	0	0	3	0	0	0	0	0	0	0	0	0	0	0	0	0	0	0	0	0	6	6	0
d__Bacteria	k__norank	p__Actinobacteria	c__Actinobacteria	o__Micrococcales	f__Micrococcaceae	g__Arthrobacter	s__unclassified_g__Arthrobacter	OTU122	7	2	32	0	34	0	0	0	12	0	0	0	18	0	0	0	34	1	0	0	69	0	0	0	4	3	0	0	7	13	0	0	0	9	2	3	0	0	70	43	12
d__Bacteria	k__norank	p__Proteobacteria	c__Gammaproteobacteria	o__Aeromonadales	f__Aeromonadaceae	g__Aeromonas	s__unclassified_g__Aeromonas	OTU447	1	0	4	0	3	0	0	0	0	0	0	0	6	0	0	0	3	0	0	0	10	0	0	0	0	0	0	0	0	0	0	0	0	0	0	0	0	0	3	4	3
d__Bacteria	k__norank	p__Proteobacteria	c__Alphaproteobacteria	o__Rhizobiales	f__Brucellaceae	g__unclassified_f__Brucellaceae	s__unclassified_f__Brucellaceae	OTU716	0	0	2	0	2	0	0	0	2	0	0	0	2	0	0	0	0	1	0	0	7	0	0	0	0	2	0	1	2	2	0	0	0	4	0	0	0	0	0	9	2
d__Bacteria	k__norank	p__Firmicutes	c__Bacilli	o__Lactobacillales	f__Lactobacillaceae	g__Lactobacillus	s__Lactobacillus_johnsonii	OTU1233	0	0	0	0	0	1	0	0	0	0	0	0	1	0	0	0	0	0	0	0	2	0	0	0	0	0	0	0	0	0	0	0	0	0	0	0	0	0	6	1	0
d__Bacteria	k__norank	p__Proteobacteria	c__Gammaproteobacteria	o__Xanthomonadales	f__Xanthomonadaceae	g__Stenotrophomonas	s__unclassified_g__Stenotrophomonas	OTU698	0	0	3	0	2	0	0	0	1	0	0	0	1	0	11	0	2	0	0	0	3	0	0	0	1	0	0	0	0	0	0	0	0	1	0	0	0	0	2	4	3
d__Bacteria	k__norank	p__Proteobacteria	c__Gammaproteobacteria	o__Pseudomonadales	f__Pseudomonadaceae	g__Pseudomonas	s__unclassified_g__Pseudomonas	OTU34	276	59	1143	0	1562	19	1	1	722	21	9	2	1357	3	1	1	2077	32	8	0	1316	1	0	0	6	86	1	24	10	18	12	2	0	39	3	1	0	0	2008	1415	1284
d__Bacteria	k__norank	p__Firmicutes	c__Bacilli	o__Lactobacillales	f__Streptococcaceae	g__Lactococcus	s__Lactococcus_piscium	OTU1082	0	0	0	0	3	0	0	0	3	0	0	0	1	0	0	0	2	0	0	0	2	0	0	0	0	0	0	0	0	0	0	0	0	0	0	0	0	0	4	1	5
d__Bacteria	k__norank	p__Firmicutes	c__Bacilli	o__Lactobacillales	f__Streptococcaceae	g__Streptococcus	s__unclassified_g__Streptococcus	OTU534	0	0	0	0	0	0	0	0	0	9	0	1	0	0	0	0	0	0	0	0	0	0	0	0	0	0	0	0	0	0	0	1	0	0	0	16	0	0	0	0	0
d__Bacteria	k__norank	p__Firmicutes	c__Clostridia	o__Clostridiales	f__Clostridiaceae_1	g__Clostridium_sensu_stricto_1	s__Clostridium_butyricum	OTU769	0	0	0	0	0	0	0	0	0	0	0	0	0	0	0	0	0	0	0	0	0	0	0	0	0	0	0	0	0	1	0	0	1569	2	0	1	2215	17530	0	0	0
d__Bacteria	k__norank	p__Proteobacteria	c__Gammaproteobacteria	o__Enterobacteriales	f__Enterobacteriaceae	g__Yersinia	s__unclassified_g__Yersinia	OTU387	13	2	65	0	96	1	2	1	21	2	0	0	77	0	0	0	103	0	0	1	60	0	0	0	0	7	0	2	0	0	1	0	0	0	0	0	0	0	91	61	46
d__Bacteria	k__norank	p__Firmicutes	c__Bacilli	o__Bacillales	f__Bacillaceae	g__Bacillus	s__unclassified_g__Bacillus	OTU89	0	0	0	0	2	0	0	0	0	0	0	0	1	0	0	0	0	0	0	0	2	0	0	1	39	0	5	0	92	109	0	8	0	312	21	5	2	0	5	0	1
d__Bacteria	k__norank	p__Proteobacteria	c__Gammaproteobacteria	o__Pseudomonadales	f__Pseudomonadaceae	g__Pseudomonas	s__Pseudomonas_gessardii	OTU889	142	21	507	1	1096	3	1	0	290	9	0	1	599	0	0	0	604	14	2	1	999	0	0	0	2	49	2	12	11	17	2	0	0	37	2	0	0	0	568	596	691
d__Bacteria	k__norank	p__Firmicutes	c__Clostridia	o__Clostridiales	f__Clostridiaceae_1	g__Clostridium_sensu_stricto_1	s__Clostridium_paraputrificum	OTU767	0	0	1	2	0	0	1	0	2	1	0	3747	0	2	0	0	0	0	0	0	0	0	0	0	0	0	0	0	0	0	0	0	0	0	0	0	1	12	0	0	0
d__Bacteria	k__norank	p__Proteobacteria	c__Gammaproteobacteria	o__Pseudomonadales	f__Moraxellaceae	g__Acinetobacter	s__Acinetobacter_junii_NIPH_182	OTU905	0	0	0	0	0	0	0	0	0	0	0	0	0	0	0	0	1	0	0	0	0	0	0	0	0	0	0	0	0	0	0	0	0	0	0	0	0	0	0	0	3
d__Bacteria	k__norank	p__Proteobacteria	c__Gammaproteobacteria	o__Pseudomonadales	f__Pseudomonadaceae	g__Pseudomonas	s__unclassified_g__Pseudomonas	OTU263	0	0	0	0	0	0	0	0	0	0	0	0	0	0	0	0	0	0	0	0	0	0	0	0	0	0	0	0	0	0	0	0	0	0	0	0	0	0	0	0	0
d__Bacteria	k__norank	p__Proteobacteria	c__Gammaproteobacteria	o__Pseudomonadales	f__Pseudomonadaceae	g__Pseudomonas	s__unclassified_g__Pseudomonas	OTU261	35	6	129	1	227	1	0	0	66	4	0	0	186	0	0	1	134	4	0	0	291	0	0	0	0	11	0	2	1	3	1	0	0	3	0	0	0	0	150	132	158
d__Bacteria	k__norank	p__Proteobacteria	c__Gammaproteobacteria	o__Pseudomonadales	f__Moraxellaceae	g__Psychrobacter	s__Psychrobacter_sp._PAMC_21119	OTU1018	1	0	7	0	8	0	0	0	2	0	0	0	5	0	0	0	4	0	0	0	4	0	0	0	0	0	0	0	0	0	0	0	0	0	0	0	0	0	9	5	2
d__Bacteria	k__norank	p__Proteobacteria	c__Alphaproteobacteria	o__Rhizobiales	f__Aurantimonadaceae	g__Martelella	s__Martelella_mediterranea	OTU426	0	0	0	0	0	0	0	0	0	0	0	0	0	0	0	0	0	0	0	0	0	0	0	0	0	0	0	0	0	0	0	0	0	0	0	0	0	0	0	0	0
d__Bacteria	k__norank	p__Proteobacteria	c__Gammaproteobacteria	o__Enterobacteriales	f__Enterobacteriaceae	g__Klebsiella	s__unclassified_g__Klebsiella	OTU29	6	3	871	25087	221	2	12789	2926	49	2	6914	8860	62	24461	24635	13439	140	1	21	12245	437	24711	24356	23535	19	31	0	1	17	3	2	1	682	15556	13009	16966	12699	5601	65	24	29
d__Bacteria	k__norank	p__Firmicutes	c__Bacilli	o__Lactobacillales	f__Aerococcaceae	g__Aerococcus	s__unclassified_g__Aerococcus	OTU786	0	0	1	0	10	0	0	0	1	0	0	0	5	0	0	0	2	0	0	0	6	0	0	0	0	0	0	1	0	0	0	0	0	0	0	0	0	0	2	4	2
d__Bacteria	k__norank	p__Firmicutes	c__Bacilli	o__Lactobacillales	f__Streptococcaceae	g__Streptococcus	s__Streptococcus_parauberis	OTU82	14	2	42	0	75	1	0	0	21	0	0	1	54	1	0	0	69	0	0	1	76	0	0	0	0	2	0	0	1	0	0	0	0	2	0	0	0	0	71	67	62
d__Bacteria	k__norank	p__Bacteroidetes	c__Flavobacteriia	o__Flavobacteriales	f__Flavobacteriaceae	g__Chryseobacterium	s__Chryseobacterium_anthropi	OTU386	5	0	17	0	32	0	0	0	12	0	0	1	28	0	0	0	49	0	0	0	36	0	0	0	0	3	0	0	0	1	0	0	0	0	0	0	0	0	53	32	31
d__Bacteria	k__norank	p__Firmicutes	c__Bacilli	o__Lactobacillales	f__Carnobacteriaceae	g__Atopostipes	s__uncultured_bacterium_g__Atopostipes	OTU376	0	0	1	0	5	0	0	0	0	0	0	0	1	0	0	0	7	0	0	0	3	0	0	0	1	0	0	0	0	0	0	0	0	0	0	0	0	0	3	0	3
d__Bacteria	k__norank	p__Proteobacteria	c__Gammaproteobacteria	o__Pseudomonadales	f__Moraxellaceae	g__Acinetobacter	s__Acinetobacter_gyllenbergii_g__Acinetobacter	OTU943	0	1	0	0	0	0	0	0	0	0	0	0	0	0	0	0	0	0	0	0	0	0	0	0	0	0	0	0	0	0	0	0	0	0	0	0	0	0	0	0	0
d__Bacteria	k__norank	p__Proteobacteria	c__Gammaproteobacteria	o__Pseudomonadales	f__Moraxellaceae	g__Acinetobacter	s__unclassified_g__Acinetobacter	OTU179	0	1	0	0	0	0	0	0	0	0	0	0	0	0	0	0	4	0	0	0	6	0	0	0	0	0	0	0	0	0	0	0	0	0	0	0	0	0	3	3	0
d__Bacteria	k__norank	p__Actinobacteria	c__Actinobacteria	o__Nitriliruptorales	f__Nitriliruptoraceae	g__unclassified_f__Nitriliruptoraceae	s__unclassified_f__Nitriliruptoraceae	OTU7	1	0	6	0	2	0	0	0	2	0	0	0	2	0	0	0	6	1	0	0	1	0	0	0	0	0	0	0	0	0	0	0	0	0	0	0	0	0	6	5	5
d__Bacteria	k__norank	p__Proteobacteria	c__Gammaproteobacteria	o__Pseudomonadales	f__Pseudomonadaceae	g__Pseudomonas	s__Pseudomonas_anguilliseptica	OTU312	1	0	1	0	5	0	0	0	0	0	0	0	1	0	0	0	3	0	0	0	4	0	0	0	0	0	0	0	0	0	0	0	0	0	0	0	0	0	1	1	2
d__Bacteria	k__norank	p__Firmicutes	c__Bacilli	o__Lactobacillales	f__Streptococcaceae	g__Streptococcus	s__unclassified_g__Streptococcus	OTU481	0	0	8	0	0	1	0	0	0	2	0	0	4	1	0	0	1	0	0	0	0	0	0	0	11	0	0	1	0	2	0	0	0	1	0	0	0	0	0	5	1
d__Bacteria	k__norank	p__Firmicutes	c__Bacilli	o__Bacillales	f__Bacillaceae	g__Oceanobacillus	s__unclassified_g__Oceanobacillus	OTU737	0	0	0	0	0	0	0	0	0	0	0	0	0	0	0	0	0	0	0	0	0	0	0	0	0	0	0	0	0	2	0	0	0	2	0	0	0	0	0	0	0
d__Bacteria	k__norank	p__Proteobacteria	c__Gammaproteobacteria	o__Pseudomonadales	f__Moraxellaceae	g__Acinetobacter	s__Acinetobacter_nosocomialis	OTU20	0	0	4	0	8	0	0	0	3	0	7	0	3	0	0	0	11	0	0	0	16	0	0	0	0	0	0	0	0	1	0	0	0	0	0	0	0	0	10	10	3
d__Bacteria	k__norank	p__Bacteroidetes	c__unclassified_p__Bacteroidetes	o__unclassified_p__Bacteroidetes	f__unclassified_p__Bacteroidetes	g__unclassified_p__Bacteroidetes	s__unclassified_p__Bacteroidetes	OTU320	0	0	0	0	0	0	0	0	0	0	0	0	0	0	0	0	0	0	0	0	0	0	0	0	1	0	0	0	1	0	0	0	0	1	0	0	0	0	0	0	0
d__Bacteria	k__norank	p__Proteobacteria	c__Alphaproteobacteria	o__Rhizobiales	f__Hyphomicrobiaceae	g__Pedomicrobium	s__unclassified_g__Pedomicrobium	OTU774	0	0	0	0	0	0	0	0	0	0	0	0	0	0	0	0	0	0	0	0	0	0	0	0	9	0	0	0	3	1	0	0	0	5	2	0	0	0	0	0	0
d__Bacteria	k__norank	p__Proteobacteria	c__Gammaproteobacteria	o__Enterobacteriales	f__Enterobacteriaceae	g__unclassified_f__Enterobacteriaceae	s__unclassified_f__Enterobacteriaceae	OTU626	0	0	0	4	1	0	0	0	0	0	0	147	0	0	0	37	0	0	0	0	1	0	0	0	0	0	0	0	1	0	0	0	0	0	0	0	0	0	0	0	0
d__Bacteria	k__norank	p__Firmicutes	c__Bacilli	o__Lactobacillales	f__Streptococcaceae	g__Streptococcus	s__unclassified_g__Streptococcus	OTU434	0	0	22	0	0	1	0	0	0	13	0	0	28	3	0	0	0	0	0	0	0	0	0	0	41	0	0	1	0	10	1	2	1	3	0	0	0	0	0	10	6
d__Bacteria	k__norank	p__Actinobacteria	c__Actinobacteria	o__Corynebacteriales	f__Corynebacteriaceae	g__Corynebacterium_1	s__Corynebacterium_tuberculostearicum	OTU605	0	2	16	0	0	0	0	0	0	0	0	0	0	0	0	0	0	0	0	0	0	0	0	0	1	0	0	0	0	0	0	0	0	0	0	0	0	0	0	0	1
d__Bacteria	k__norank	p__Firmicutes	c__Bacilli	o__Lactobacillales	f__Streptococcaceae	g__Lactococcus	s__Lactococcus_piscium	OTU456	0	0	0	0	1	0	0	0	0	0	0	0	1	0	0	0	0	0	0	0	2	0	0	0	0	0	0	0	0	0	0	0	0	0	0	0	0	0	1	0	1
d__Bacteria	k__norank	p__Firmicutes	c__Bacilli	o__Lactobacillales	f__Enterococcaceae	g__Enterococcus	s__unclassified_g__Enterococcus	OTU863	0	0	0	0	0	0	0	0	0	0	1	0	0	0	0	0	0	0	1	0	0	0	0	1	0	0	0	0	0	0	0	0	2	0	4	1	4	0	0	0	0
d__Bacteria	k__norank	p__Firmicutes	c__Bacilli	o__Lactobacillales	f__Streptococcaceae	g__Lactococcus	s__Lactococcus_piscium	OTU893	0	0	1	0	1	0	0	0	1	0	0	0	2	0	0	0	1	0	0	0	1	0	0	0	0	0	0	0	0	1	0	0	0	0	0	0	0	0	2	0	0
d__Bacteria	k__norank	p__Firmicutes	c__Negativicutes	o__Selenomonadales	f__Veillonellaceae	g__Veillonella	s__unclassified_g__Veillonella	OTU70	0	0	0	0	0	0	0	0	0	0	0	0	0	0	0	0	0	0	0	0	0	0	0	0	0	0	0	0	0	0	0	0	0	0	0	0	21	21	0	0	0
d__Bacteria	k__norank	p__Cyanobacteria	c__Cyanobacteria	o__norank_c__Cyanobacteria	f__norank_c__Cyanobacteria	g__norank_c__Cyanobacteria	s__unclassified_g__norank_c__Cyanobacteria	OTU1236	0	0	0	0	0	0	0	0	0	0	0	0	0	0	0	0	2	0	0	0	0	0	0	0	0	0	0	0	5	2	0	0	0	2	0	0	0	0	0	0	0
d__Bacteria	k__norank	p__Proteobacteria	c__Gammaproteobacteria	o__Enterobacteriales	f__Enterobacteriaceae	g__Hafnia-Obesumbacterium	s__unclassified_g__Hafnia-Obesumbacterium	OTU1090	0	0	10	0	6	0	0	0	2	0	0	0	11	0	0	0	7	1	0	0	14	0	0	0	0	1	0	0	0	1	0	0	0	0	0	0	0	0	12	7	7
d__Bacteria	k__norank	p__Firmicutes	c__Bacilli	o__Lactobacillales	f__Streptococcaceae	g__Lactococcus	s__Lactococcus_piscium	OTU952	1	0	0	0	1	0	0	0	0	0	0	0	0	0	0	0	0	0	0	0	1	0	0	0	0	0	0	0	0	0	0	0	0	0	0	0	0	0	1	1	0
d__Bacteria	k__norank	p__Firmicutes	c__Negativicutes	o__Selenomonadales	f__Veillonellaceae	g__Veillonella	s__unclassified_g__Veillonella	OTU69	0	0	0	0	0	0	0	0	0	0	0	0	0	0	0	0	0	0	0	0	0	0	0	0	0	0	0	0	0	0	0	0	0	0	0	0	28	156	0	0	0
d__Bacteria	k__norank	p__Bacteroidetes	c__Flavobacteriia	o__Flavobacteriales	f__Flavobacteriaceae	g__Myroides	s__Myroides_profundi	OTU37	90	14	382	0	550	0	1	2	224	7	2	0	423	0	2	0	604	7	1	0	473	0	0	0	0	25	0	6	3	3	3	0	1	1	0	0	0	0	615	447	508
d__Bacteria	k__norank	p__Firmicutes	c__Bacilli	o__Lactobacillales	f__Streptococcaceae	g__Lactococcus	s__Lactococcus_raffinolactis	OTU999	90	23	441	0	684	7	1	3	300	3	1	3	512	4	1	0	646	5	1	0	650	1	0	0	8	27	2	4	16	19	2	3	0	53	4	6	0	0	606	503	554
d__Bacteria	k__norank	p__Proteobacteria	c__Gammaproteobacteria	o__Pseudomonadales	f__Moraxellaceae	g__Acinetobacter	s__unclassified_g__Acinetobacter	OTU872	0	2	17	0	22	0	1	0	8	0	0	0	6	1	0	0	23	0	1	0	31	0	0	0	0	1	0	0	0	0	0	0	0	0	0	0	0	0	36	29	7
d__Bacteria	k__norank	p__Firmicutes	c__Bacilli	o__Lactobacillales	f__Carnobacteriaceae	g__Carnobacterium	s__Carnobacterium_maltaromaticum	OTU810	20	1	85	0	156	2	0	0	65	2	1	0	99	1	0	0	150	2	1	0	174	0	0	0	11	2	1	1	6	2	0	1	0	18	2	2	0	0	210	148	137
d__Bacteria	k__norank	p__Firmicutes	c__Bacilli	o__Bacillales	f__Staphylococcaceae	g__Staphylococcus	s__unclassified_g__Staphylococcus	OTU496	0	0	0	0	0	0	0	0	0	0	0	0	0	0	0	0	0	0	0	0	0	0	0	0	0	0	0	0	0	0	0	0	0	0	0	1	0	0	0	0	0
d__Bacteria	k__norank	p__Firmicutes	c__Bacilli	o__Lactobacillales	f__Streptococcaceae	g__Streptococcus	s__unclassified_g__Streptococcus	OTU1104	0	0	6	0	0	1	0	0	0	1	0	0	3	9	0	0	0	7	0	0	0	3	3	0	0	0	0	0	0	0	0	4	0	0	0	14	2	0	0	5	2
d__Bacteria	k__norank	p__Proteobacteria	c__Gammaproteobacteria	o__Enterobacteriales	f__Enterobacteriaceae	g__unclassified_f__Enterobacteriaceae	s__unclassified_f__Enterobacteriaceae	OTU707	2	0	19	320	10	0	51	8	4	0	67	4288	10	5	9	12012	14	0	0	8	10	3	0	0	0	0	0	0	0	0	0	0	0	1	0	0	1	5	15	2	5
d__Bacteria	k__norank	p__Proteobacteria	c__Gammaproteobacteria	o__Pseudomonadales	f__Pseudomonadaceae	g__Pseudomonas	s__Pseudomonas_fragi	OTU1001	186	17	583	1	935	16	0	1	383	6	2	1	812	0	1	2	866	12	4	2	942	0	0	0	0	54	1	8	7	13	6	0	0	26	3	0	1	0	752	643	641
d__Bacteria	k__norank	p__Firmicutes	c__Bacilli	o__Lactobacillales	f__Lactobacillaceae	g__Lactobacillus	s__Lactobacillus_oligofermentans	OTU1031	0	0	0	0	0	0	0	0	0	0	0	0	0	0	0	0	0	0	0	0	0	0	0	0	0	0	0	0	0	0	0	0	0	0	0	0	0	0	0	0	0
d__Bacteria	k__norank	p__Proteobacteria	c__Gammaproteobacteria	o__Pseudomonadales	f__Moraxellaceae	g__Enhydrobacter	s__Moraxella_osloensis_g__Enhydrobacter	OTU795	124	21	528	1	787	9	1	1	331	6	0	1	633	2	0	0	866	11	5	0	819	1	0	0	2	43	1	5	5	3	6	0	0	18	2	1	0	0	875	659	642
d__Bacteria	k__norank	p__Firmicutes	c__Bacilli	o__Bacillales	f__Staphylococcaceae	g__Staphylococcus	s__unclassified_g__Staphylococcus	OTU466	0	0	0	0	0	0	0	0	0	0	0	0	0	0	0	0	0	0	1	0	0	0	0	0	0	0	0	0	0	0	0	0	0	0	0	0	0	0	0	0	0
d__Bacteria	k__norank	p__Tenericutes	c__Mollicutes	o__Mycoplasmatales	f__Mycoplasmataceae	g__Ureaplasma	s__unclassified_g__Ureaplasma	OTU866	0	0	0	0	0	0	0	0	0	0	0	0	0	0	0	0	0	0	0	0	0	0	0	0	0	0	0	0	0	1269	117	66	2	1014	172	0	0	0	0	0	0
d__Bacteria	k__norank	p__Firmicutes	c__Bacilli	o__Bacillales	f__Listeriaceae	g__Brochothrix	s__Brochothrix_thermosphacta	OTU427	71	14	316	0	649	2	0	2	258	10	4	2	421	1	0	0	611	7	3	1	554	0	0	0	2	21	2	0	4	3	3	0	0	15	3	1	0	0	603	523	387
d__Bacteria	k__norank	p__Firmicutes	c__Bacilli	o__Lactobacillales	f__Streptococcaceae	g__Lactococcus	s__Lactococcus_piscium	OTU279	10	0	14	0	7	2	0	1	11	1	0	0	17	1	0	0	9	1	0	0	5	0	0	0	1	0	0	0	2	1	1	0	0	1	0	0	0	0	12	6	15
d__Bacteria	k__norank	p__Firmicutes	c__Bacilli	o__Bacillales	f__Staphylococcaceae	g__Staphylococcus	s__unclassified_g__Staphylococcus	OTU469	0	0	0	0	0	0	0	0	0	0	0	0	0	0	0	0	0	0	1	0	0	0	0	0	0	0	0	0	0	0	1	0	0	0	0	1	0	0	0	0	0
d__Bacteria	k__norank	p__Bacteroidetes	c__Flavobacteriia	o__Flavobacteriales	f__Flavobacteriaceae	g__Empedobacter	s__Empedobacter_brevis_g__Empedobacter	OTU792	1	2	5	0	8	0	0	0	6	0	0	0	9	0	0	0	11	0	0	0	10	0	0	0	0	1	0	0	0	0	0	0	0	0	0	0	0	0	8	8	11
d__Bacteria	k__norank	p__Firmicutes	c__Bacilli	o__Lactobacillales	f__unclassified_o__Lactobacillales	g__unclassified_o__Lactobacillales	s__unclassified_o__Lactobacillales	OTU49	1	3	0	3	0	4	0	18	0	102	287	17	0	2	0	2	0	100	900	202	0	5	3	3	92	0	15	15	7	10	2	6	0	0	0	23	1	6	0	0	0
d__Bacteria	k__norank	p__Firmicutes	c__Bacilli	o__Lactobacillales	f__Lactobacillaceae	g__Lactobacillus	s__Lactobacillus_plantarum_subsp._plantarum	OTU712	0	0	0	0	0	0	0	0	0	0	0	0	0	0	0	0	1	0	0	0	0	0	0	0	0	0	0	0	0	0	0	0	0	0	0	0	0	1	0	0	0
d__Bacteria	k__norank	p__Firmicutes	c__Bacilli	o__Bacillales	f__Bacillaceae	g__Bacillus	s__Bacillus_pseudofirmus_g__Bacillus	OTU1093	0	0	0	0	0	0	0	0	0	0	0	0	0	0	0	0	0	0	0	0	0	0	0	0	0	0	0	0	0	1	0	0	0	0	0	0	0	0	0	0	0
d__Bacteria	k__norank	p__Firmicutes	c__Bacilli	o__Bacillales	f__Staphylococcaceae	g__Staphylococcus	s__unclassified_g__Staphylococcus	OTU460	0	10	0	0	0	0	0	0	0	0	0	0	0	0	0	0	0	0	0	0	0	0	0	0	0	0	0	0	0	1	6	0	0	0	0	1	0	0	0	0	0
d__Bacteria	k__norank	p__Cyanobacteria	c__Cyanobacteria	o__norank_c__Cyanobacteria	f__norank_c__Cyanobacteria	g__norank_c__Cyanobacteria	s__unclassified_g__norank_c__Cyanobacteria	OTU272	0	0	0	0	0	0	0	0	0	0	0	0	0	0	0	0	0	0	0	0	0	0	0	0	0	0	0	0	0	0	0	0	0	0	0	0	0	0	1	0	0
d__Bacteria	k__norank	p__Firmicutes	c__Clostridia	o__Clostridiales	f__Peptostreptococcaceae	g__Romboutsia	s__uncultured_bacterium_g__Romboutsia	OTU874	2	0	2	0	0	1	0	0	0	1	0	0	3	0	0	0	1	0	0	0	3	0	0	0	0	0	0	0	0	0	0	0	0	0	0	0	0	0	1	1	3
d__Bacteria	k__norank	p__Actinobacteria	c__Actinobacteria	o__Micrococcales	f__Micrococcaceae	g__Nesterenkonia	s__unclassified_g__Nesterenkonia	OTU375	1	1	20	0	5	0	0	0	1	0	0	0	4	0	0	0	9	0	0	0	17	0	0	0	0	0	0	1	0	0	0	0	0	0	0	0	0	0	3	3	5
d__Bacteria	k__norank	p__Nitrospirae	c__Nitrospira	o__norank_c__Nitrospira	f__norank_c__Nitrospira	g__Nitrospira	s__Nitrospira_defluvii	OTU345	0	0	0	0	0	0	0	0	0	0	0	0	0	0	0	0	0	0	0	0	0	0	0	0	0	0	0	0	2	2	0	0	1	0	1	0	0	0	0	0	0
d__Bacteria	k__norank	p__Proteobacteria	c__Gammaproteobacteria	o__unclassified_c__Gammaproteobacteria	f__unclassified_c__Gammaproteobacteria	g__unclassified_c__Gammaproteobacteria	s__unclassified_c__Gammaproteobacteria	OTU869	0	0	2	0	0	0	0	0	0	0	1	0	0	5	0	0	1	0	0	6	0	1	0	1	0	0	0	0	0	0	0	0	0	0	5	2	0	0	0	0	0
d__Bacteria	k__norank	p__Saccharibacteria	c__norank_p__Saccharibacteria	o__norank_p__Saccharibacteria	f__norank_p__Saccharibacteria	g__norank_p__Saccharibacteria	s__uncultured_bacterium_g__norank_p__Saccharibacteria	OTU797	3	0	3	0	0	0	0	0	2	0	0	0	4	0	0	0	4	0	0	0	2	0	0	0	1	0	0	0	0	0	0	0	0	0	0	0	0	0	3	3	5
d__Bacteria	k__norank	p__Firmicutes	c__Bacilli	o__Bacillales	f__Staphylococcaceae	g__Staphylococcus	s__unclassified_g__Staphylococcus	OTU509	0	0	0	0	0	0	0	0	0	0	0	0	0	0	0	0	0	0	1	0	0	0	0	0	0	0	0	0	1	0	0	0	0	0	0	1	0	0	0	0	0
[truncated: 155 more columns]
