# Supplementary material for: Patterned progression of gut microbiota associated with necrotizing enterocolitis and late onset sepsis in preterm infants: a prospective study in a Chinese neonatal intensive care unit
Source: PeerJ. 2019 Jul 22;7:e7310. doi: 10.7717/peerj.7310 (PMC6657676; doi:10.7717/peerj.7310)
Supplement: Table S3 — NEC patient #2 died of NEC totals at the 23rd day of life. LOS patient #3 presented with constant fever, tachypnea, poor feeding and white blood cells >20 cells/microL; she didn’t react well with empirical antibiotics usage for more than 7 days. Thus, according to the principles of beneficence, she was given vancomycin before the result of hemoculture could be available. After receiving vancomycin, the symptoms alleviated, CBC parameters went normal so that her diagnosis was traced back as “Late-onset Sepsis”. [file peerj-07-7310-s003.xlsx]

## Sheet: Table S3. 
Group	Patient ID	Gender	Gestational Age (weeks)	Birth Weight(g)	NEC Stage	Site/type of Infection	Pathogen	Age when diagnosed(days)	Duration of Antibiotic usage(days)	Length of Stay(days)	Number of Samples
NEC	NEC1	Male	29	1690	IIB	/	/	11	/	63	18
NEC	NEC2	Female	29	1025	IIB	/	/	19	/	221	8
NEC	NEC3	Female	30	1950	IIA	/	/	16	/	49	13
NEC	NEC4	Female	29	1180	IIA	/	/	18	/	83	6
LOS	LOS1	Male	29	1080	/	Bacteremia	Klebsiella Pneumoniae	22	21	65	15
LOS	LOS2	Female	30	975	/	Bacteremia	Acinetobacter baumannii, Klebsiella Pneumoniae, Pseudomonas aeruginosa	10	37	71	16
LOS	LOS3	Female	31	1370	/	Pneumonia	N/A2	17	13	44	13
control	control1	Male	28	1090	/	/	/	/	/	58	9
control	control2	Female	28	1350	/	/	/	/	/	56	5
control	control3	Male	29	1230	/	/	/	/	/	23	6
control	control4	Female	30	1445	/	/	/	/	/	46	7
control	control5	Female	30	1090	/	/	/	/	/	22	5
control	control6	Female	31	1550	/	/	/	/	/	36	10
control	control7	Female	31	1560	/	/	/	/	/	30	10
control	control8	Female	31	1350	/	/	/	/	/	53	5
control	control9	Male	31	1700	/	/	/	/	/	37	4
control	control10	Male	31	1520	/	/	/	/	/	29	4
control	control11	Male	31	1480	/	/	/	/	/	29	4
control	control12	Female	32	1860	/	/	/	/	/	23	5
control	control13	Male	32	1940	/	/	/	/	/	23	6
control	control14	Female	32	1990	/	/	/	/	/	19	4
control	control15	Female	33	1610	/	/	/	/	/	26	7
control	control16	Male	33	1480	/	/	/	/	/	27	9
control	control17	Male	33	1720	/	/	/	/	/	22	4
