# Supplementary material for: Patterned progression of gut microbiota associated with necrotizing enterocolitis and late onset sepsis in preterm infants: a prospective study in a Chinese neonatal intensive care unit
Source: PeerJ. 2019 Jul 22;7:e7310. doi: 10.7717/peerj.7310 (PMC6657676; doi:10.7717/peerj.7310)
Supplement: Table S4 — Each row represents one patient and column represents day of life. A cell named ”TRUE” means that the fecal sample was collected. Each color represents one time interval for analysis. [file peerj-07-7310-s004.xlsx]

## Sheet: metaData_reform
patient	day of life 1	2	3	4	5	6	7	8	9	10	11	12	13	14	15	16	17	18	19	20	21	22	23	24	25	26	27	28	29	30	31	32	33	34	35	36	37	38	39	40	41	42	43	44	45	46	47	48	49
NEC1		TRUE						TRUE		TRUE	TRUE		TRUE		TRUE					TRUE	TRUE		TRUE		TRUE			TRUE		TRUE	TRUE					TRUE						TRUE
NEC2			TRUE	TRUE	TRUE		TRUE			TRUE				TRUE					TRUE	mean19&22		TRUE
NEC3		TRUE		TRUE			TRUE			TRUE			TRUE		TRUE			mean15&21			TRUE							TRUE							TRUE				TRUE			TRUE							TRUE
NEC4		TRUE		TRUE			TRUE							TRUE							TRUE				mean21&28			TRUE
LOS1	TRUE		TRUE	TRUE											TRUE						TRUE	TRUE		TRUE				TRUE							TRUE							TRUE			TRUE
LOS2	TRUE			TRUE			TRUE			TRUE	TRUE		TRUE				TRUE				TRUE							TRUE						TRUE							TRUE								TRUE
LOS3	TRUE		TRUE	TRUE			TRUE			TRUE				TRUE				TRUE			TRUE			TRUE				TRUE						TRUE				TRUE				TRUE
control1	TRUE	TRUE		TRUE			TRUE			TRUE				TRUE							TRUE				TRUE				TRUE
control2	TRUE							TRUE						TRUE							TRUE							TRUE
control3	TRUE	TRUE			TRUE		TRUE						TRUE								TRUE
control4			TRUE	TRUE			TRUE							TRUE			TRUE				TRUE							TRUE	TRUE
control5			TRUE	TRUE			TRUE							TRUE							TRUE
control6	TRUE		TRUE	TRUE			TRUE			TRUE				TRUE				TRUE			TRUE			TRUE				TRUE
control7	TRUE		TRUE	TRUE			TRUE			TRUE				TRUE			TRUE				TRUE			TRUE				TRUE
control8	TRUE					TRUE								TRUE							TRUE					TRUE
control9		TRUE					TRUE						TRUE								TRUE
control10	TRUE							TRUE					TRUE							TRUE
control11	TRUE				TRUE							TRUE								TRUE
control12	TRUE			TRUE				TRUE							TRUE						TRUE
control13	TRUE		TRUE	TRUE			TRUE								TRUE						TRUE
control14	TRUE						TRUE							TRUE		TRUE
control15	TRUE								TRUE						TRUE		TRUE	TRUE			TRUE					TRUE
control16	TRUE	TRUE		TRUE			TRUE			TRUE				TRUE			TRUE				TRUE						TRUE
control17		TRUE						TRUE						TRUE							TRUE
	early post partum
	early pre-onset
	late pre-onset
	early disease
	middle disease
	late disease
	post disease
[truncated: 20 more columns]
